# Supplementary material for: Aberrant methylation and expression of TNXB promote chondrocyte apoptosis and extracullar matrix degradation in hemophilic arthropathy via AKT signaling
Source: bioRxiv preprint, doi:10.1101/2023.12.11.570472, version 5 (2024-05-16)
Supplement: Supplement file 2 [file 570472_file20.docx]

**Supplement file 2.** Primer sequences for qPCR

| **Primer name** | **Primer sequence (5’→3’)** |
| --- | --- |
| *Col2a1* Forward | GGGAATGTCCTCTGCGATGAC |
| *Col2a1* Reverse | GAAGGGGATCTCGGGGTTG |
| *Mmp13* Forward | CTTCTTCTTGTTGAGCTGGACTC |
| *Mmp13* Reverse | CTGTGGAGGTCACTGTAGACT |
| *Tnxb* Forward | TCCGTGTAGACTCAGCAAAGG |
| *Tnxb* Reverse | CCCCACGATAAGAGACAGCG |
| *Actb* Forward | GGCTGTATTCCCCTCCATCG |
| *Actb* Reverse | CCAGTTGGTAACAATGCCATGT |
