# Supplementary material for: Aberrant methylation and expression of TNXB promote chondrocyte apoptosis and extracullar matrix degradation in hemophilic arthropathy via AKT signaling
Source: bioRxiv preprint, doi:10.1101/2023.12.11.570472, version 5 (2024-05-16)
Supplement: Supplement file 3 [file 570472_file21.xlsx]

## Sheet: Supplement file 3a
Supplement file 3a. DMRs between HA and OA cartilages
Region	chr	start	end	width	probe_count	probe_list	UCSC_RefGene_Name	UCSC_RefGene_Group	Relation_to_UCSC_CpG_Island	GO_BP	GO_MF	GO_CC	KEGG_Pathway	OA1	OA2	OA3	OA4	OA5	HA1	HA3	HA4	HA5	HA2	minFoldChange	maxFoldChange	meanFoldChange	p.value	BH.adjust	BY.adjust
DMR_1	7	27183133	27185732	2599	40	cg04863892,cg03368099,cg19759481,cg09207400,cg05774699,cg25506432,cg25390165,cg02106682,cg20817131,cg08070327,cg26023912,cg06465806,cg14882265,cg09549073,cg00969405,cg23936031,cg17432857,cg14013695,cg01323381,cg23454797,cg21641458,cg02916332,cg07049592,cg03207666,cg20517050,cg27151303,cg02005600,cg16997642,cg05579037,cg19643053,cg17569124,cg14014955,cg02646423,cg09343092,cg24040595,cg01748892,cg1…	HOXA5,HOXA6,	TSS1500	Island=39,S_Shore=1	GO:0003016,respiratory system process|GO:0006366,transcription from RNA polymerase II promoter|GO:0009952,anterior/posterior pattern specification|GO:0010870,positive regulation of receptor biosynthetic process|GO:0016477,cell migration|GO:0016525,negative regulation of angiogenesis|GO:0030878,thyroid gland development|GO:0033599,regulation of mammary gland epithelial cell proliferation|GO:003526…	GO:0000978,RNA polymerase II proximal promoter sequence-specific DNA binding|GO:0001077,transcriptional activator activity, RNA polymerase II proximal promoter sequence-specific DNA binding|GO:0003677,DNA binding|GO:0003700,DNA binding transcription factor activity|GO:0005515,protein binding,GO:0003700,DNA binding transcription factor activity|GO:0043565,sequence-specific DNA binding,	GO:0005634,nucleus,		0.568928	0.613228	0.588163	0.55637	0.485291	0.826715	0.844692	0.836186	0.783186	0.73404	0.482335	0.90377	0.695317	0	0	0
DMR_2	6	32063394	32065211	1817	42	cg14196170,cg02989255,cg01337207,cg17662683,cg16834823,cg00872984,cg27387193,cg01569346,cg01992382,cg10923662,cg13698691,cg00525277,cg03421270,cg10365886,cg12694372,cg13400512,cg15793329,cg21342636,cg21337909,cg24475062,cg18330047,cg15196197,cg07518714,cg07524919,cg21642103,cg10890302,cg03556669,cg21289669,cg27081346,cg00355613,cg15745284,cg04753078,cg15014577,cg00779476,cg04037640,cg04286337,cg1…	TNXB	Body	Island=37,N_Shore=4,S_Shore=1	GO:0007155,cell adhesion|GO:0030036,actin cytoskeleton organization|GO:0030199,collagen fibril organization|GO:0032963,collagen metabolic process|GO:0048251,elastic fiber assembly	GO:0005178,integrin binding|GO:0005515,protein binding|GO:0008201,heparin binding	GO:0005576,extracellular region|GO:0005578,proteinaceous extracellular matrix|GO:0005583,fibrillar collagen trimer|GO:0005615,extracellular space|GO:0005622,intracellular|GO:0031012,extracellular matrix|GO:0031012,extracellular matrix|GO:0031012,extracellular matrix|GO:0070062,extracellular exosome	hsa04151 PI3K-Akt signaling pathway - Homo sapiens (human)|hsa04510 Focal adhesion - Homo sapiens (human)|hsa04512 ECM-receptor interaction - Homo sapiens (human)|hsa05206 MicroRNAs in cancer - Homo sapiens (human)	0.490245	0.499595	0.509815	0.511193	0.497679	0.764558	0.726034	0.748232	0.707804	0.669665	0.472316	0.991894	0.690172	0	0	0
DMR_3	6	30652202	30653799	1597	23	cg01413582,cg18586886,cg03953626,cg15768443,cg12036303,cg20690667,cg25659902,cg11414821,cg12247101,cg08887400,cg05098566,cg08253704,cg00010853,cg24967096,cg00278359,cg12105190,cg18335326,cg25980484,cg03052182,cg12197421,cg10098021,cg11554650,cg06644669	KIAA1949	5'UTR	N_Shelf=6,N_Shore=17					0.418324	0.510757	0.458489	0.513931	0.56707	0.146279	0.160256	0.123357	0.188672	0.259127	1.05298	9.03506	3.58555	0	0	0
DMR_4	10	123353298	123354194	896	13	cg00730832,cg14856220,cg02412684,cg13175830,cg10314760,cg10788901,cg10362842,cg17337672,cg15049101,cg17997363,cg20277356,cg23444251,cg11836372	FGFR2	TSS200	N_Shelf=13	GO:0000122,negative regulation of transcription from RNA polymerase II promoter|GO:0000165,MAPK cascade|GO:0001525,angiogenesis|GO:0001657,ureteric bud development|GO:0001701,in utero embryonic development|GO:0001837,epithelial to mesenchymal transition|GO:0002053,positive regulation of mesenchymal cell proliferation|GO:0003148,outflow tract septum morphogenesis|GO:0003149,membranous septum morph…	GO:0004713,protein tyrosine kinase activity|GO:0004713,protein tyrosine kinase activity|GO:0005007,fibroblast growth factor-activated receptor activity|GO:0005007,fibroblast growth factor-activated receptor activity|GO:0005007,fibroblast growth factor-activated receptor activity|GO:0005088,Ras guanyl-nucleotide exchange factor activity|GO:0005515,protein binding|GO:0005524,ATP binding|GO:0008201,…	GO:0005634,nucleus|GO:0005654,nucleoplasm|GO:0005737,cytoplasm|GO:0005794,Golgi apparatus|GO:0005886,plasma membrane|GO:0005887,integral component of plasma membrane|GO:0005938,cell cortex|GO:0009986,cell surface|GO:0016020,membrane|GO:0016021,integral component of membrane|GO:0031012,extracellular matrix|GO:0031410,cytoplasmic vesicle|GO:0043231,intracellular membrane-bounded organelle|GO:006007…	hsa01521 EGFR tyrosine kinase inhibitor resistance - Homo sapiens (human)|hsa04010 MAPK signaling pathway - Homo sapiens (human)|hsa04014 Ras signaling pathway - Homo sapiens (human)|hsa04015 Rap1 signaling pathway - Homo sapiens (human)|hsa04144 Endocytosis - Homo sapiens (human)|hsa04151 PI3K-Akt signaling pathway - Homo sapiens (human)|hsa04550 Signaling pathways regulating pluripotency of ste…	0.363101	0.249653	0.385627	0.241133	0.278402	0.837978	0.767834	0.855811	0.821573	0.764939	0.195819	0.569996	0.370949	0	0	0
DMR_5	12	115134148	115135906	1758	34	cg23754320,cg11841771,cg19536929,cg10767192,cg08162222,cg05574357,cg08618204,cg17428559,cg08086720,cg16856049,cg13934308,cg27125044,cg01614102,cg23342718,cg18197377,cg26385172,cg08286181,cg18949192,cg19175386,cg08175609,cg00661970,cg25616547,cg18761549,cg17029354,cg10831607,cg05398903,cg21045464,cg25106645,cg15402529,cg03723247,cg00737571,cg18788932,cg17173663,cg14793406		IGR	N_Shore=34					0.0956035	0.145005	0.133575	0.0998126	0.151118	0.342449	0.258669	0.300528	0.218352	0.210322	0.206065	1.176	0.517258	0	0	0
DMR_6	6	33130696	33134325	3629	40	cg15081128,cg01828813,cg02304614,cg17790159,cg07703081,cg00324223,cg17931986,cg04249605,cg03500646,cg08077736,cg23945333,cg01701055,cg26867987,cg15047502,cg06924878,cg01533585,cg23332813,cg12881453,cg09510921,cg14095303,cg22370716,cg24483785,cg02667414,cg20506659,cg06049932,cg24213189,cg07570257,cg14147420,cg18754388,cg01881428,cg12084925,cg17578548,cg02890435,cg04464727,cg04820679,cg12945707,cg1…	COL11A2	3'UTR	opensea=5,S_Shelf=26,S_Shore=9	GO:0001501,skeletal system development|GO:0001501,skeletal system development|GO:0007605,sensory perception of sound|GO:0030199,collagen fibril organization|GO:0030574,collagen catabolic process|GO:0051216,cartilage development|GO:0060021,palate development|GO:0060023,soft palate development	GO:0005515,protein binding|GO:0030020,extracellular matrix structural constituent conferring tensile strength|GO:0030674,protein binding, bridging|GO:0046872,metal ion binding	GO:0005576,extracellular region|GO:0005592,collagen type XI trimer|GO:0005788,endoplasmic reticulum lumen	hsa04974 Protein digestion and absorption - Homo sapiens (human)	0.401587	0.337157	0.436107	0.375946	0.418064	0.563145	0.516664	0.532068	0.571255	0.592041	0.431544	0.95279	0.68883	0	0	0
DMR_7	6	32054771	32055738	967	22	cg20471413,cg15697476,cg26997880,cg06892049,cg02740950,cg24055029,cg05483184,cg18178010,cg11823230,cg17001689,cg21460606,cg19807376,cg07810190,cg10812186,cg07345515,cg09996288,cg23724858,cg26346796,cg02352370,cg22547540,cg14161269,cg06580770	TNXB	Body	Island=12,N_Shore=7,S_Shore=3	GO:0007155,cell adhesion|GO:0030036,actin cytoskeleton organization|GO:0030199,collagen fibril organization|GO:0032963,collagen metabolic process|GO:0048251,elastic fiber assembly	GO:0005178,integrin binding|GO:0005515,protein binding|GO:0008201,heparin binding	GO:0005576,extracellular region|GO:0005578,proteinaceous extracellular matrix|GO:0005583,fibrillar collagen trimer|GO:0005615,extracellular space|GO:0005622,intracellular|GO:0031012,extracellular matrix|GO:0031012,extracellular matrix|GO:0031012,extracellular matrix|GO:0070062,extracellular exosome	hsa04151 PI3K-Akt signaling pathway - Homo sapiens (human)|hsa04510 Focal adhesion - Homo sapiens (human)|hsa04512 ECM-receptor interaction - Homo sapiens (human)|hsa05206 MicroRNAs in cancer - Homo sapiens (human)	0.103	0.0975239	0.120093	0.100377	0.171324	0.33465	0.218455	0.280503	0.225319	0.276311	0.123312	1.49439	0.421999	0	0	0
DMR_8	6	32119639	32121433	1794	35	cg19048176,cg02429905,cg17161421,cg21037008,cg04749507,cg13035743,cg23359665,cg06814287,cg17113856,cg06108383,cg08045906,cg12883279,cg18235088,cg25426302,cg01111041,cg16481280,cg13102294,cg10551329,cg12626589,cg20328456,cg06264679,cg12585943,cg06025456,cg00552704,cg11386011,cg00403498,cg13934406,cg00110832,cg04105091,cg12738718,cg14130039,cg18049167,cg03570994,cg12387154,cg12602633	PPT2,PRRT1	TSS1500	N_Shore=32,S_Shore=3	GO:0046949,fatty-acyl-CoA biosynthetic process|GO:0098734,macromolecule depalmitoylation,GO:0009607,response to biotic stimulus	GO:0008474,palmitoyl-(protein) hydrolase activity|GO:0016790,thiolester hydrolase activity|GO:0098599,palmitoyl hydrolase activity|GO:0098599,palmitoyl hydrolase activity,	GO:0005764,lysosome|GO:0043202,lysosomal lumen|GO:0043231,intracellular membrane-bounded organelle|GO:0070062,extracellular exosome,GO:0005886,plasma membrane|GO:0016020,membrane|GO:0016021,integral component of membrane|GO:0030054,cell junction|GO:0045202,synapse	hsa00062 Fatty acid elongation - Homo sapiens (human)|hsa01100 Metabolic pathways - Homo sapiens (human)|hsa01212 Fatty acid metabolism - Homo sapiens (human)|hsa04142 Lysosome - Homo sapiens (human),	0.0603562	0.0487097	0.0741606	0.0638216	0.0809192	0.126756	0.119658	0.0811493	0.1614	0.181763	0.213401	1.02646	0.496695	0	0	0
DMR_9	7	134832131	134833335	1204	13	cg17738733,cg08016257,cg07972322,cg27641628,cg07522970,cg10014112,cg06456031,cg05034242,cg11065438,cg21363348,cg12577010,cg09414827,cg13120814	C7orf49,TMEM140	TSS1500	opensea=13	GO:0006303,double-strand break repair via nonhomologous end joining,	GO:0005515,protein binding	GO:0005634,nucleus|GO:0005737,cytoplasm,GO:0016021,integral component of membrane		0.377223	0.295567	0.3178	0.358416	0.382769	0.0966822	0.110817	0.0699407	0.105382	0.119629	1.90407	5.75999	4.23764	0	0	0
DMR_10	7	27207996	27209828	1832	24	cg21310745,cg22858277,cg23854860,cg10224937,cg11114504,cg20261859,cg11097541,cg18181034,cg09973548,cg15912800,cg20884887,cg02886033,cg01819512,cg16447012,cg08362210,cg24884519,cg25644556,cg05250768,cg26259537,cg18311537,cg08964780,cg01024168,cg04298953,cg05027336	HOXA10-AS,,MIR196B	TSS1500	Island=11,N_Shore=11,S_Shore=2					0.0387281	0.0327894	0.0456956	0.0348319	0.0431121	0.131906	0.0812033	0.0785031	0.114948	0.0860805	0.250061	0.69213	0.406536	0	0	0
DMR_11	6	31650735	31651676	941	19	cg25769566,cg01297670,cg07455790,cg24520975,cg02389040,cg25417675,cg05857999,cg04386400,cg18264486,cg13740929,cg03570253,cg02304584,cg11991824,cg22318514,cg18576957,cg08624648,cg20435535,cg06460587,cg03141756		IGR	Island=16,S_Shore=3					0.135407	0.121337	0.140356	0.129717	0.153299	0.316497	0.277665	0.3027	0.301862	0.321481	0.215331	0.713525	0.404264	0	0	0
DMR_12	11	2321770	2323459	1689	31	cg03494648,cg15924868,cg00502099,cg05403469,cg00041575,cg19766471,cg22210337,cg05608541,cg01612681,cg21201830,cg13186130,cg11525052,cg25961099,cg14510967,cg09358071,cg07489413,cg26598899,cg19505827,cg15579389,cg05509777,cg13731761,cg23929682,cg21027517,cg05572370,cg02537342,cg00833795,cg01211906,cg10782575,cg09114153,cg04026926,cg13592872	C11orf21,TSPAN32	TSS200	opensea=31	,GO:0007010,cytoskeleton organization|GO:0007166,cell surface receptor signaling pathway|GO:0007229,integrin-mediated signaling pathway|GO:0007267,cell-cell signaling|GO:0008285,negative regulation of cell proliferation|GO:0030886,negative regulation of myeloid dendritic cell activation|GO:0042832,defense response to protozoan|GO:0050688,regulation of defense response to virus|GO:0070527,platelet…	,GO:0003674,molecular_function	GO:0005737,cytoplasm,GO:0005622,intracellular|GO:0005887,integral component of plasma membrane|GO:0009986,cell surface|GO:0070442,integrin alphaIIb-beta3 complex		0.651541	0.701994	0.658604	0.68995	0.704168	0.596045	0.564156	0.557536	0.536424	0.515842	1.03105	2.1273	1.3049	0	0	0
DMR_13	11	128812804	128813836	1032	19	cg19889666,cg22837015,cg21033709,cg13962286,cg04817300,cg24908198,cg09615719,cg19275133,cg09682051,cg23811942,cg09847882,cg09015676,cg17636033,cg08432383,cg10116840,cg03996398,cg01302245,cg25010612,cg27002237	TP53AIP1	TSS1500	opensea=19	GO:0006915,apoptotic process|GO:0042981,regulation of apoptotic process	GO:0003674,molecular_function	GO:0005739,mitochondrion|GO:0005759,mitochondrial matrix	hsa04115 p53 signaling pathway - Homo sapiens (human)|hsa04210 Apoptosis - Homo sapiens (human)	0.181802	0.154709	0.210151	0.159872	0.198504	0.340413	0.343875	0.292738	0.399415	0.442945	0.224758	0.826656	0.422461	0	0	0
DMR_14	8	49532875	49533682	807	10	cg15014678,cg24593488,cg24159559,cg17675263,cg12869305,cg19913626,cg25859835,cg23402467,cg04893634,cg09405635	LOC101929217,	TSS200	opensea=10					0.7959	0.818903	0.854185	0.795434	0.859334	0.381174	0.404289	0.301903	0.421684	0.553475	1.57873	2.63075	2.09845	0	0	0
DMR_15	7	30950813	30951801	988	12	cg00516678,cg04372674,cg11827925,cg09676669,cg18080604,cg25230363,cg25075794,cg26923410,cg00622010,cg10132917,cg15039806,cg07135629	AQP1	TSS1500	opensea=12	GO:0003091,renal water homeostasis|GO:0003094,glomerular filtration|GO:0003097,renal water transport|GO:0006182,cGMP biosynthetic process|GO:0006813,potassium ion transport|GO:0006833,water transport|GO:0006833,water transport|GO:0006833,water transport|GO:0006884,cell volume homeostasis|GO:0010592,positive regulation of lamellipodium assembly|GO:0010634,positive regulation of epithelial cell mig…	GO:0005223,intracellular cGMP activated cation channel activity|GO:0005267,potassium channel activity|GO:0005372,water transmembrane transporter activity|GO:0005515,protein binding|GO:0008519,ammonium transmembrane transporter activity|GO:0015079,potassium ion transmembrane transporter activity|GO:0015168,glycerol transmembrane transporter activity|GO:0015250,water channel activity|GO:0015250,wat…	GO:0005634,nucleus|GO:0005737,cytoplasm|GO:0005886,plasma membrane|GO:0005886,plasma membrane|GO:0005886,plasma membrane|GO:0005887,integral component of plasma membrane|GO:0005903,brush border|GO:0009925,basal plasma membrane|GO:0016323,basolateral plasma membrane|GO:0016324,apical plasma membrane|GO:0020003,symbiont-containing vacuole|GO:0020005,symbiont-containing vacuole membrane|GO:0030424,a…	hsa04924 Renin secretion - Homo sapiens (human)|hsa04964 Proximal tubule bicarbonate reclamation - Homo sapiens (human)|hsa04976 Bile secretion - Homo sapiens (human)	0.488956	0.625518	0.51567	0.534185	0.563017	0.153493	0.249631	0.156441	0.19373	0.241575	1.30818	7.41562	4.25301	0	0	0
DMR_16	4	4863678	4864902	1224	16	cg17814781,cg24840099,cg14769943,cg20891301,cg11078084,cg22609784,cg03843978,cg21538208,cg19596468,cg09748975,cg25144207,cg01785568,cg15848031,cg27597123,cg09573795,cg27038439	MSX1	3'UTR	Island=5,N_Shore=11	GO:0000122,negative regulation of transcription from RNA polymerase II promoter|GO:0000902,cell morphogenesis|GO:0001701,in utero embryonic development|GO:0003198,epithelial to mesenchymal transition involved in endocardial cushion formation|GO:0006366,transcription from RNA polymerase II promoter|GO:0007517,muscle organ development|GO:0008285,negative regulation of cell proliferation|GO:0009952,…	GO:0000977,RNA polymerase II regulatory region sequence-specific DNA binding|GO:0000982,transcription factor activity, RNA polymerase II proximal promoter sequence-specific DNA binding|GO:0001227,transcriptional repressor activity, RNA polymerase II transcription regulatory region sequence-specific DNA binding|GO:0001228,transcriptional activator activity, RNA polymerase II transcription regulato…	GO:0005634,nucleus|GO:0005654,nucleoplasm	hsa05166 HTLV-I infection - Homo sapiens (human)	0.497419	0.454724	0.527098	0.393816	0.464559	0.819028	0.780213	0.786247	0.74074	0.664946	0.471143	0.816327	0.608823	0	0	0
DMR_17	1	25257505	25258332	827	18	cg26256263,cg24006721,cg03171924,cg15014975,cg07996594,cg21406271,cg24019564,cg13106389,cg25882256,cg04250451,cg04221877,cg18087266,cg25470148,cg13305657,cg24842859,cg20695936,cg10993442,cg04907595	RUNX3	TSS1500	Island=18	GO:0000122,negative regulation of transcription from RNA polymerase II promoter|GO:0001503,ossification|GO:0002062,chondrocyte differentiation|GO:0006355,regulation of transcription, DNA-templated|GO:0006357,regulation of transcription from RNA polymerase II promoter|GO:0006366,transcription from RNA polymerase II promoter|GO:0006468,protein phosphorylation|GO:0030097,hemopoiesis|GO:0045595,regul…	GO:0000977,RNA polymerase II regulatory region sequence-specific DNA binding|GO:0000981,RNA polymerase II transcription factor activity, sequence-specific DNA binding|GO:0000981,RNA polymerase II transcription factor activity, sequence-specific DNA binding|GO:0003700,DNA binding transcription factor activity|GO:0005515,protein binding|GO:0005524,ATP binding	GO:0000790,nuclear chromatin|GO:0005634,nucleus|GO:0005654,nucleoplasm|GO:0005730,nucleolus|GO:0005737,cytoplasm|GO:0005829,cytosol|GO:0005829,cytosol|GO:0043231,intracellular membrane-bounded organelle	hsa04658 Th1 and Th2 cell differentiation - Homo sapiens (human)	0.165715	0.152446	0.215141	0.118809	0.234846	0.374647	0.370765	0.378363	0.338572	0.475152	0.31094	0.647007	0.441829	0	0	0
DMR_18	5	138210550	138211703	1153	16	cg17750096,cg16688303,cg01156295,cg06605984,cg16822914,cg08771171,cg17865528,cg17315014,cg16777413,cg23184518,cg11677683,cg14902598,cg20515447,cg16577593,cg06606949,cg18712348	LRRTM2,CTNNA1	TSS1500	opensea=16	GO:0002091,negative regulation of receptor internalization|GO:0050808,synapse organization|GO:0051965,positive regulation of synapse assembly|GO:0060291,long-term synaptic potentiation,GO:0001541,ovarian follicle development|GO:0007015,actin filament organization|GO:0007155,cell adhesion|GO:0007163,establishment or maintenance of cell polarity|GO:0007406,negative regulation of neuroblast prolifer…	GO:0042043,neurexin family protein binding,GO:0003723,RNA binding|GO:0005198,structural molecule activity|GO:0005515,protein binding|GO:0008013,beta-catenin binding|GO:0017166,vinculin binding|GO:0042802,identical protein binding|GO:0045295,gamma-catenin binding|GO:0045296,cadherin binding|GO:0045296,cadherin binding|GO:0046982,protein heterodimerization activity|GO:0051015,actin filament binding	GO:0016021,integral component of membrane|GO:0030054,cell junction|GO:0045211,postsynaptic membrane|GO:0060076,excitatory synapse,GO:0001669,acrosomal vesicle|GO:0005794,Golgi apparatus|GO:0005829,cytosol|GO:0005886,plasma membrane|GO:0005886,plasma membrane|GO:0005911,cell-cell junction|GO:0005915,zonula adherens|GO:0005925,focal adhesion|GO:0014704,intercalated disc|GO:0015629,actin cytoskeleto…	,hsa04390 Hippo signaling pathway - Homo sapiens (human)|hsa04520 Adherens junction - Homo sapiens (human)|hsa04670 Leukocyte transendothelial migration - Homo sapiens (human)|hsa05100 Bacterial invasion of epithelial cells - Homo sapiens (human)|hsa05200 Pathways in cancer - Homo sapiens (human)|hsa05213 Endometrial cancer - Homo sapiens (human)|hsa05412 Arrhythmogenic right ventricular cardiomy…	0.218639	0.179723	0.247138	0.215217	0.274046	0.443635	0.326345	0.372188	0.496861	0.505233	0.236624	0.990774	0.433738	0	0	0
DMR_19	5	142065539	142066989	1450	16	cg05926771,cg20684197,cg06778567,cg07247133,cg00564426,cg06399118,cg10476085,cg05198969,cg07666840,cg19954000,cg11839863,cg06381031,cg17593472,cg07206630,cg15371881,cg08816023	FGF1	TSS1500	opensea=16	GO:0000165,MAPK cascade|GO:0000187,activation of MAPK activity|GO:0001525,angiogenesis|GO:0001759,organ induction|GO:0007165,signal transduction|GO:0007275,multicellular organism development|GO:0008283,cell proliferation|GO:0008284,positive regulation of cell proliferation|GO:0008284,positive regulation of cell proliferation|GO:0008543,fibroblast growth factor receptor signaling pathway|GO:000854…	GO:0004713,protein tyrosine kinase activity|GO:0005088,Ras guanyl-nucleotide exchange factor activity|GO:0005104,fibroblast growth factor receptor binding|GO:0005104,fibroblast growth factor receptor binding|GO:0005178,integrin binding|GO:0005515,protein binding|GO:0008083,growth factor activity|GO:0008201,heparin binding|GO:0008201,heparin binding|GO:0016303,1-phosphatidylinositol-3-kinase activ…	GO:0005576,extracellular region|GO:0005576,extracellular region|GO:0005578,proteinaceous extracellular matrix|GO:0005615,extracellular space|GO:0005654,nucleoplasm|GO:0005730,nucleolus|GO:0005829,cytosol|GO:0005938,cell cortex	hsa04010 MAPK signaling pathway - Homo sapiens (human)|hsa04014 Ras signaling pathway - Homo sapiens (human)|hsa04015 Rap1 signaling pathway - Homo sapiens (human)|hsa04151 PI3K-Akt signaling pathway - Homo sapiens (human)|hsa04390 Hippo signaling pathway - Homo sapiens (human)|hsa04810 Regulation of actin cytoskeleton - Homo sapiens (human)|hsa05200 Pathways in cancer - Homo sapiens (human)|hsa0…	0.155017	0.133317	0.187692	0.164995	0.192155	0.337493	0.287389	0.259058	0.364766	0.382059	0.200797	0.844962	0.397733	0	0	0
DMR_20	1	201708419	201709675	1256	13	cg01828733,cg18539461,cg14377596,cg01411786,cg16023122,cg13877974,cg14168733,cg05091570,cg21552734,cg22488259,cg04919516,cg07139329,cg27441486	NAV1	TSS1500	Island=6,N_Shore=6,S_Shore=1	GO:0001578,microtubule bundle formation|GO:0001764,neuron migration		GO:0005737,cytoplasm|GO:0005874,microtubule|GO:0043194,axon initial segment		0.0542403	0.0416732	0.0763096	0.0348289	0.0528474	0.190579	0.145822	0.144963	0.209728	0.163039	0.123431	0.58509	0.301338	0	0	0
DMR_21	11	8832111	8833095	984	13	cg15234168,cg12865939,cg17213154,cg13736131,cg00249584,cg02640005,cg26942121,cg17046776,cg17638841,cg22989033,cg26695291,cg19113668,cg25363151	ST5	TSS1500	opensea=13	GO:0065009,regulation of molecular function	GO:0017112,Rab guanyl-nucleotide exchange factor activity			0.0860016	0.0568524	0.121525	0.0823156	0.113003	0.31479	0.255811	0.213638	0.32043	0.342839	0.180754	0.369904	0.313482	0	0	0
DMR_22	6	30094960	30095570	610	20	cg21376799,cg14645861,cg05994850,cg06938705,cg18628732,cg12860635,cg20167366,cg04768479,cg26719062,cg19059495,cg17034390,cg06893296,cg21334513,cg05068206,cg01964152,cg02049405,cg27282900,cg23079252,cg18055610,cg12534216		IGR	Island=15,N_Shore=5					0.0837786	0.0702651	0.0885144	0.0780161	0.0803693	0.155406	0.177299	0.143998	0.208468	0.220622	0.284382	1.0383	0.492371	0	0	0
DMR_23	10	123355239	123356514	1275	12	cg25052156,cg13437682,cg06791446,cg02210151,cg10379346,cg11430259,cg18566515,cg22633036,cg01385327,cg17681491,cg07877847,cg17710779	FGFR2	TSS1500	N_Shore=12	GO:0000122,negative regulation of transcription from RNA polymerase II promoter|GO:0000165,MAPK cascade|GO:0001525,angiogenesis|GO:0001657,ureteric bud development|GO:0001701,in utero embryonic development|GO:0001837,epithelial to mesenchymal transition|GO:0002053,positive regulation of mesenchymal cell proliferation|GO:0003148,outflow tract septum morphogenesis|GO:0003149,membranous septum morph…	GO:0004713,protein tyrosine kinase activity|GO:0004713,protein tyrosine kinase activity|GO:0005007,fibroblast growth factor-activated receptor activity|GO:0005007,fibroblast growth factor-activated receptor activity|GO:0005007,fibroblast growth factor-activated receptor activity|GO:0005088,Ras guanyl-nucleotide exchange factor activity|GO:0005515,protein binding|GO:0005524,ATP binding|GO:0008201,…	GO:0005634,nucleus|GO:0005654,nucleoplasm|GO:0005737,cytoplasm|GO:0005794,Golgi apparatus|GO:0005886,plasma membrane|GO:0005887,integral component of plasma membrane|GO:0005938,cell cortex|GO:0009986,cell surface|GO:0016020,membrane|GO:0016021,integral component of membrane|GO:0031012,extracellular matrix|GO:0031410,cytoplasmic vesicle|GO:0043231,intracellular membrane-bounded organelle|GO:006007…	hsa01521 EGFR tyrosine kinase inhibitor resistance - Homo sapiens (human)|hsa04010 MAPK signaling pathway - Homo sapiens (human)|hsa04014 Ras signaling pathway - Homo sapiens (human)|hsa04015 Rap1 signaling pathway - Homo sapiens (human)|hsa04144 Endocytosis - Homo sapiens (human)|hsa04151 PI3K-Akt signaling pathway - Homo sapiens (human)|hsa04550 Signaling pathways regulating pluripotency of ste…	0.0777857	0.0587135	0.0968871	0.0701461	0.0935605	0.254657	0.207991	0.296628	0.277439	0.333764	0.241433	0.4995	0.316243	0	0	0
DMR_24	4	186732837	186733590	753	11	cg01933073,cg12309668,cg13921444,cg18342119,cg02790305,cg12066473,cg04348265,cg26785346,cg18566313,cg04392082,cg27262015	SORBS2	TSS1500	opensea=11	GO:0007015,actin filament organization|GO:0008150,biological_process|GO:0061049,cell growth involved in cardiac muscle cell development	GO:0003723,RNA binding|GO:0005200,structural constituent of cytoskeleton|GO:0005515,protein binding|GO:0008093,cytoskeletal adaptor activity|GO:0008307,structural constituent of muscle	GO:0005634,nucleus|GO:0005925,focal adhesion|GO:0015629,actin cytoskeleton|GO:0016324,apical plasma membrane|GO:0030018,Z disc|GO:0030027,lamellipodium|GO:0048471,perinuclear region of cytoplasm		0.154765	0.105077	0.17448	0.14298	0.199616	0.519155	0.281147	0.399176	0.49485	0.437378	0.178403	0.770208	0.328111	0	0	0
DMR_25	6	48036212	48036676	464	11	cg09816507,cg23618440,cg27250236,cg21292008,cg24035447,cg00457913,cg03709091,cg20116804,cg08345713,cg20584831,cg01612730	C6orf138,PTCHD4	TSS1500	Island=4,S_Shore=7	,GO:0008150,biological_process	,GO:0003674,molecular_function	,GO:0005575,cellular_component|GO:0016021,integral component of membrane		0.0370902	0.0314584	0.0404788	0.0276094	0.0317599	0.145263	0.162331	0.136733	0.134763	0.131191	0.10546	0.402265	0.23928	0	0	0
DMR_26	7	27186554	27188020	1466	15	cg00297048,cg23129930,cg25316484,cg05928186,cg19183743,cg12110087,cg09936824,cg04265576,cg27313941,cg24362796,cg03529432,cg14044640,cg12810523,cg22469274,cg24719020	HOXA-AS3,HOXA6	TSS1500	Island=11,N_Shore=2,S_Shore=2	,GO:0006351,transcription, DNA-templated|GO:0006355,regulation of transcription, DNA-templated|GO:0009952,anterior/posterior pattern specification|GO:0048704,embryonic skeletal system morphogenesis	,GO:0003700,DNA binding transcription factor activity|GO:0043565,sequence-specific DNA binding	,GO:0005634,nucleus		0.187251	0.198417	0.23173	0.212262	0.219141	0.496731	0.37166	0.391726	0.371186	0.335171	0.251005	0.852591	0.456376	0	0	0
DMR_27	7	94023308	94023988	680	10	cg23348014,cg08695855,cg10368049,cg06299997,cg26942275,cg18511007,cg24406898,cg10258721,cg09146903,cg25300386	COL1A2	TSS1500	opensea=10	GO:0001501,skeletal system development|GO:0001568,blood vessel development|GO:0007179,transforming growth factor beta receptor signaling pathway|GO:0007266,Rho protein signal transduction|GO:0007596,blood coagulation|GO:0008217,regulation of blood pressure|GO:0030168,platelet activation|GO:0030198,extracellular matrix organization|GO:0030199,collagen fibril organization|GO:0030574,collagen catabo…	GO:0002020,protease binding|GO:0005201,extracellular matrix structural constituent|GO:0005515,protein binding|GO:0030674,protein binding, bridging|GO:0042802,identical protein binding|GO:0046332,SMAD binding|GO:0046872,metal ion binding|GO:0048407,platelet-derived growth factor binding	GO:0005576,extracellular region|GO:0005576,extracellular region|GO:0005584,collagen type I trimer|GO:0005584,collagen type I trimer|GO:0005584,collagen type I trimer|GO:0005615,extracellular space|GO:0005783,endoplasmic reticulum|GO:0005788,endoplasmic reticulum lumen|GO:0031012,extracellular matrix|GO:0031012,extracellular matrix|GO:0070062,extracellular exosome	hsa04151 PI3K-Akt signaling pathway - Homo sapiens (human)|hsa04510 Focal adhesion - Homo sapiens (human)|hsa04512 ECM-receptor interaction - Homo sapiens (human)|hsa04611 Platelet activation - Homo sapiens (human)|hsa04933 AGE-RAGE signaling pathway in diabetic complications - Homo sapiens (human)|hsa04974 Protein digestion and absorption - Homo sapiens (human)|hsa05146 Amoebiasis - Homo sapiens…	0.393893	0.481477	0.419387	0.415217	0.440291	0.125041	0.176777	0.112904	0.138848	0.172689	1.30818	7.19919	4.08866	0	0	0
DMR_28	1	25291385	25292225	840	12	cg09993145,cg27058497,cg07801894,cg05714960,cg06640822,cg04554131,cg12459932,cg14425908,cg13461622,cg16529592,cg11585280,cg19774846	RUNX3	TSS1500	opensea=12	GO:0000122,negative regulation of transcription from RNA polymerase II promoter|GO:0001503,ossification|GO:0002062,chondrocyte differentiation|GO:0006355,regulation of transcription, DNA-templated|GO:0006357,regulation of transcription from RNA polymerase II promoter|GO:0006366,transcription from RNA polymerase II promoter|GO:0006468,protein phosphorylation|GO:0030097,hemopoiesis|GO:0045595,regul…	GO:0000977,RNA polymerase II regulatory region sequence-specific DNA binding|GO:0000981,RNA polymerase II transcription factor activity, sequence-specific DNA binding|GO:0000981,RNA polymerase II transcription factor activity, sequence-specific DNA binding|GO:0003700,DNA binding transcription factor activity|GO:0005515,protein binding|GO:0005524,ATP binding	GO:0000790,nuclear chromatin|GO:0005634,nucleus|GO:0005654,nucleoplasm|GO:0005730,nucleolus|GO:0005737,cytoplasm|GO:0005829,cytosol|GO:0005829,cytosol|GO:0043231,intracellular membrane-bounded organelle	hsa04658 Th1 and Th2 cell differentiation - Homo sapiens (human)	0.785171	0.83068	0.840211	0.853029	0.888201	0.552233	0.484569	0.457127	0.643074	0.68529	1.14262	2.14278	1.55984	0	0	0
DMR_29	20	43936663	43937975	1312	17	cg21745307,cg06041278,cg03695613,cg20256260,cg16667508,cg09206268,cg19655577,cg26495953,cg22669717,cg06407657,cg04305670,cg17918288,cg14608505,cg27176129,cg23168456,cg10535411,cg16137772	MATN4,RBPJL	TSS1500	N_Shelf=2,S_Shore=15	GO:0030198,extracellular matrix organization,GO:0006366,transcription from RNA polymerase II promoter|GO:0007165,signal transduction|GO:0045944,positive regulation of transcription from RNA polymerase II promoter	GO:0005509,calcium ion binding|GO:0005515,protein binding,GO:0000978,RNA polymerase II proximal promoter sequence-specific DNA binding|GO:0000982,transcription factor activity, RNA polymerase II proximal promoter sequence-specific DNA binding|GO:0001228,transcriptional activator activity, RNA polymerase II transcription regulatory region sequence-specific DNA binding|GO:0003682,chromatin binding|…	GO:0005576,extracellular region,GO:0005634,nucleus|GO:0005667,transcription factor complex	,hsa04330 Notch signaling pathway - Homo sapiens (human)|hsa04658 Th1 and Th2 cell differentiation - Homo sapiens (human)|hsa05169 Epstein-Barr virus infection - Homo sapiens (human)|hsa05203 Viral carcinogenesis - Homo sapiens (human)	0.18593	0.16384	0.206224	0.17157	0.185864	0.287714	0.283977	0.242329	0.344555	0.346703	0.269143	1.01803	0.489311	0	0	0
DMR_30	5	178986131	178986906	775	14	cg19626725,cg26516362,cg25658438,cg06118287,cg00080972,cg09060608,cg21226059,cg14820908,cg05457628,cg02136620,cg20199595,cg08058472,cg22764044,cg01955137	RUFY1	TSS1500	Island=9,N_Shore=5	GO:0006661,phosphatidylinositol biosynthetic process|GO:0006897,endocytosis|GO:0015031,protein transport|GO:0030100,regulation of endocytosis	GO:0005515,protein binding|GO:0008289,lipid binding|GO:0008565,protein transporter activity|GO:0017124,SH3 domain binding|GO:0042169,SH2 domain binding|GO:0046872,metal ion binding	GO:0005768,endosome|GO:0005829,cytosol|GO:0005829,cytosol|GO:0016607,nuclear speck|GO:0031901,early endosome membrane|GO:0043231,intracellular membrane-bounded organelle	hsa04144 Endocytosis - Homo sapiens (human)	0.0272304	0.0269837	0.0368675	0.0297399	0.0432416	0.069072	0.0795436	0.0536844	0.111643	0.164949	0.164724	0.725505	0.337185	0	0	0
DMR_31	19	46998786	46999535	749	13	cg04211632,cg25837277,cg11410682,cg18709349,cg24718465,cg06618097,cg04255201,cg16617301,cg03969996,cg04689048,cg25806524,cg23716779,cg22928599	PNMAL2	TSS1500	Island=6,S_Shore=7					0.247635	0.226852	0.246216	0.260443	0.265441	0.508709	0.444155	0.453186	0.451181	0.436313	0.307233	0.732937	0.511156	0	0	0
DMR_32	16	54404353	54404959	606	10	cg03467555,cg01638741,cg01991625,cg00253379,cg03997105,cg13605024,cg26656987,cg13555283,cg02469838,cg10766285		IGR	opensea=10					0.257997	0.297817	0.214767	0.247242	0.194295	0.55725	0.570616	0.598391	0.512642	0.409712	0.185988	0.711022	0.405483	0	0	0
DMR_33	17	6898315	6899888	1573	19	cg12908125,cg05284666,cg15422419,cg05215748,cg19536664,cg05657792,cg13168555,cg08946332,cg25987502,cg05215272,cg14375499,cg03760483,cg03762994,cg03404566,cg21237687,cg09737314,cg12262378,cg03407747,cg02493798	ALOX12	TSS1500	Island=15,N_Shore=4	GO:0006928,movement of cell or subcellular component|GO:0007568,aging|GO:0008284,positive regulation of cell proliferation|GO:0008284,positive regulation of cell proliferation|GO:0010595,positive regulation of endothelial cell migration|GO:0010628,positive regulation of gene expression|GO:0010656,negative regulation of muscle cell apoptotic process|GO:0019369,arachidonic acid metabolic process|GO…	GO:0004052,arachidonate 12-lipoxygenase activity|GO:0004052,arachidonate 12-lipoxygenase activity|GO:0005506,iron ion binding|GO:0005515,protein binding|GO:0016165,linoleate 13S-lipoxygenase activity|GO:0016702,oxidoreductase activity, acting on single donors with incorporation of molecular oxygen, incorporation of two atoms of oxygen|GO:0047977,hepoxilin-epoxide hydrolase activity|GO:0051120,hep…	GO:0005737,cytoplasm|GO:0005829,cytosol|GO:0005829,cytosol|GO:0016020,membrane|GO:0042383,sarcolemma|GO:0070062,extracellular exosome	hsa00590 Arachidonic acid metabolism - Homo sapiens (human)|hsa01100 Metabolic pathways - Homo sapiens (human)|hsa01523 Antifolate resistance - Homo sapiens (human)|hsa04726 Serotonergic synapse - Homo sapiens (human)|hsa04750 Inflammatory mediator regulation of TRP channels - Homo sapiens (human)	0.26003	0.206319	0.272416	0.219014	0.2328	0.336289	0.337439	0.299329	0.429797	0.381075	0.335793	0.955484	0.558188	0	0	0
DMR_34	2	128403133	128403710	577	11	cg23015614,cg25279605,cg27298008,cg20074593,cg19604027,cg08666092,cg12979562,cg25740301,cg23528975,cg12662563,cg27522311	GPR17,LIMS2	TSS1500	opensea=11	GO:0002376,immune system process|GO:0002862,negative regulation of inflammatory response to antigenic stimulus|GO:0007186,G-protein coupled receptor signaling pathway|GO:0035025,positive regulation of Rho protein signal transduction|GO:0051482,positive regulation of cytosolic calcium ion concentration involved in phospholipase C-activating G-protein coupled signaling pathway|GO:0070098,chemokine-…	GO:0004950,chemokine receptor activity,GO:0046872,metal ion binding	GO:0005886,plasma membrane|GO:0005887,integral component of plasma membrane,GO:0005634,nucleus|GO:0005829,cytosol|GO:0005886,plasma membrane|GO:0005925,focal adhesion		0.598531	0.526716	0.560561	0.574961	0.564597	0.822294	0.768934	0.812542	0.818276	0.778797	0.497291	0.866024	0.691144	0	0	0
DMR_35	15	41061384	41062273	889	11	cg05638787,cg16764778,cg17113968,cg22079077,cg25700533,cg26705724,cg13065206,cg07306253,cg19909997,cg16022206,cg19095568	DNAJC17,C15orf62	TSS1500	opensea=11	GO:0000122,negative regulation of transcription from RNA polymerase II promoter|GO:0006351,transcription, DNA-templated|GO:1901998,toxin transport,GO:0007266,Rho protein signal transduction|GO:0008360,regulation of cell shape|GO:0030838,positive regulation of actin filament polymerization|GO:0031274,positive regulation of pseudopodium assembly|GO:0043547,positive regulation of GTPase activity	GO:0003723,RNA binding,GO:0005096,GTPase activator activity|GO:0017049,GTP-Rho binding	GO:0005634,nucleus|GO:0005737,cytoplasm,GO:0005737,cytoplasm|GO:0005739,mitochondrion|GO:0005886,plasma membrane		0.0807784	0.0740174	0.0741718	0.0846819	0.073388	0.255495	0.222406	0.20158	0.235435	0.188952	0.20306	0.601033	0.303135	0	0	0
DMR_36	10	530635	531584	949	12	cg20472384,cg14429526,cg26116937,cg25712088,cg27568360,cg09955645,cg27421267,cg23978242,cg16977735,cg06439603,cg00590260,cg00219169	DIP2C	Body	Island=5,N_Shore=1,S_Shore=6	GO:0008150,biological_process|GO:0008152,metabolic process	GO:0003674,molecular_function|GO:0003824,catalytic activity	GO:0005575,cellular_component		0.169706	0.131365	0.170251	0.145883	0.177999	0.352654	0.257673	0.33678	0.423824	0.389984	0.190177	0.759976	0.397615	0	0	0
DMR_37	2	27664658	27665711	1053	11	cg26350635,cg21071148,cg04845466,cg17158414,cg26034919,cg20102877,cg12000995,cg21248554,cg12648201,cg11618577,cg24768116	KRTCAP3	TSS1500	Island=8,N_Shore=2,S_Shore=1			GO:0016021,integral component of membrane		0.269374	0.212426	0.288754	0.23229	0.285806	0.523912	0.486025	0.474608	0.535931	0.573504	0.237311	0.890592	0.438865	0	0	0
DMR_38	6	30039010	30039801	791	17	cg13185413,cg09279736,cg24103044,cg26730543,cg06249604,cg10930308,cg13401893,cg12633154,cg16078649,cg03343571,cg07382347,cg23712018,cg00947782,cg13918754,cg02188185,cg01286685,cg12736877	RNF39	Body	Island=14,S_Shore=3	GO:0008150,biological_process	GO:0046872,metal ion binding	GO:0005575,cellular_component|GO:0005737,cytoplasm		0.209438	0.349933	0.330604	0.339611	0.265406	0.16587	0.132681	0.17986	0.153026	0.144928	1.10334	5.21439	2.64148	0	0	0
DMR_39	6	168785320	168785970	650	8	cg25394782,cg20566286,cg08406698,cg06132803,cg22782017,cg21002542,cg01601658,cg12758485		IGR	opensea=8					0.612736	0.676415	0.638559	0.697668	0.794521	0.239578	0.224179	0.151248	0.341328	0.45334	2.05707	3.2476	2.49215	0	0	0
DMR_40	12	2800055	2801158	1103	11	cg19200285,cg13647052,cg00848945,cg05166022,cg12350325,cg15279308,cg03731464,cg15442907,cg02794451,cg14395444,cg18816701	CACNA1C	3'UTR	Island=9,N_Shore=1,S_Shore=1	GO:0002520,immune system development|GO:0007204,positive regulation of cytosolic calcium ion concentration|GO:0007507,heart development|GO:0010881,regulation of cardiac muscle contraction by regulation of the release of sequestered calcium ion|GO:0035115,embryonic forelimb morphogenesis|GO:0035585,calcium-mediated signaling using extracellular calcium source|GO:0043010,camera-type eye development…	GO:0005245,voltage-gated calcium channel activity|GO:0005245,voltage-gated calcium channel activity|GO:0005245,voltage-gated calcium channel activity|GO:0005515,protein binding|GO:0008331,high voltage-gated calcium channel activity|GO:0008331,high voltage-gated calcium channel activity|GO:0046872,metal ion binding|GO:0051393,alpha-actinin binding|GO:0086007,voltage-gated calcium channel activity …	GO:0005737,cytoplasm|GO:0005886,plasma membrane|GO:0005886,plasma membrane|GO:0005891,voltage-gated calcium channel complex|GO:0014069,postsynaptic density|GO:0016021,integral component of membrane|GO:0030018,Z disc|GO:1990454,L-type voltage-gated calcium channel complex	hsa04010 MAPK signaling pathway - Homo sapiens (human)|hsa04020 Calcium signaling pathway - Homo sapiens (human)|hsa04022 cGMP-PKG signaling pathway - Homo sapiens (human)|hsa04024 cAMP signaling pathway - Homo sapiens (human)|hsa04260 Cardiac muscle contraction - Homo sapiens (human)|hsa04261 Adrenergic signaling in cardiomyocytes - Homo sapiens (human)|hsa04270 Vascular smooth muscle contractio…	0.174883	0.174254	0.161738	0.179182	0.183698	0.491171	0.431739	0.509385	0.356995	0.352417	0.1683	0.802066	0.359208	0	0	0
DMR_41	6	32025909	32026797	888	10	cg20113726,cg14713231,cg13036593,cg21951797,cg06365270,cg19071976,cg16225663,cg25596754,cg26249135,cg14642392	TNXB	Body	opensea=10	GO:0007155,cell adhesion|GO:0030036,actin cytoskeleton organization|GO:0030199,collagen fibril organization|GO:0032963,collagen metabolic process|GO:0048251,elastic fiber assembly	GO:0005178,integrin binding|GO:0005515,protein binding|GO:0008201,heparin binding	GO:0005576,extracellular region|GO:0005578,proteinaceous extracellular matrix|GO:0005583,fibrillar collagen trimer|GO:0005615,extracellular space|GO:0005622,intracellular|GO:0031012,extracellular matrix|GO:0031012,extracellular matrix|GO:0031012,extracellular matrix|GO:0070062,extracellular exosome	hsa04151 PI3K-Akt signaling pathway - Homo sapiens (human)|hsa04510 Focal adhesion - Homo sapiens (human)|hsa04512 ECM-receptor interaction - Homo sapiens (human)|hsa05206 MicroRNAs in cancer - Homo sapiens (human)	0.120158	0.103174	0.14247	0.111834	0.145759	0.28237	0.259367	0.20532	0.349236	0.372945	0.155732	0.719401	0.34159	0	0	0
DMR_42	4	151502935	151504138	1203	10	cg08219218,cg20334738,cg25718696,cg02075410,cg22265605,cg21977434,cg18080558,cg26218269,cg05878390,cg16385330	LRBA,MAB21L2	TSS200	Island=1,N_Shore=9	GO:0008150,biological_process,GO:0001654,eye development|GO:0007399,nervous system development|GO:0008284,positive regulation of cell proliferation|GO:0010172,embryonic body morphogenesis|GO:0043010,camera-type eye development	GO:0003674,molecular_function,GO:0005515,protein binding	GO:0005764,lysosome|GO:0005783,endoplasmic reticulum|GO:0005794,Golgi apparatus|GO:0005886,plasma membrane|GO:0016020,membrane|GO:0016021,integral component of membrane,GO:0005634,nucleus|GO:0005737,cytoplasm		0.111897	0.0521257	0.164019	0.0570112	0.115256	0.265988	0.382734	0.25282	0.266197	0.450064	0.250203	0.371043	0.307726	0	0	0
DMR_43	8	145728138	145728630	492	11	cg00280345,cg07658280,cg09265054,cg25600446,cg09957864,cg05241828,cg16582889,cg26572973,cg14476479,cg19352605,cg16587265	GPT	TSS1500	N_Shore=7,S_Shore=4	GO:0008652,cellular amino acid biosynthetic process|GO:0042853,L-alanine catabolic process	GO:0004021,L-alanine:2-oxoglutarate aminotransferase activity|GO:0004021,L-alanine:2-oxoglutarate aminotransferase activity|GO:0030170,pyridoxal phosphate binding	GO:0005829,cytosol|GO:0070062,extracellular exosome	hsa00220 Arginine biosynthesis - Homo sapiens (human)|hsa00250 Alanine, aspartate and glutamate metabolism - Homo sapiens (human)|hsa01100 Metabolic pathways - Homo sapiens (human)|hsa01200 Carbon metabolism - Homo sapiens (human)|hsa01210 2-Oxocarboxylic acid metabolism - Homo sapiens (human)|hsa01230 Biosynthesis of amino acids - Homo sapiens (human)	0.173629	0.102078	0.193875	0.123069	0.145055	0.378508	0.384685	0.345916	0.406326	0.425912	0.230836	0.453494	0.367331	0	0	0
DMR_44	16	67918001	67918965	964	12	cg01756421,cg19413291,cg09756419,cg01068601,cg02308079,cg10574499,cg10630578,cg03294833,cg02215611,cg00511334,cg09395969,cg00925722	NRN1L,EDC4	TSS1500	Island=7,N_Shore=4,S_Shore=1	GO:0006501,C-terminal protein lipidation|GO:1990138,neuron projection extension,GO:0008150,biological_process|GO:0031087,deadenylation-independent decapping of nuclear-transcribed mRNA|GO:0043928,exonucleolytic nuclear-transcribed mRNA catabolic process involved in deadenylation-dependent decay	GO:0042803,protein homodimerization activity|GO:0046982,protein heterodimerization activity,GO:0005515,protein binding	GO:0005576,extracellular region|GO:0005615,extracellular space|GO:0005886,plasma membrane|GO:0030424,axon|GO:0046658,anchored component of plasma membrane,GO:0000932,P-body|GO:0005634,nucleus|GO:0005654,nucleoplasm|GO:0005737,cytoplasm|GO:0005829,cytosol|GO:0016020,membrane|GO:0036464,cytoplasmic ribonucleoprotein granule	,hsa03018 RNA degradation - Homo sapiens (human)	0.278991	0.215671	0.305686	0.232251	0.270898	0.453286	0.438958	0.390443	0.494951	0.506348	0.187805	0.954363	0.474764	0	0	0
DMR_45	6	33156779	33157222	443	9	cg22501449,cg11835806,cg23704085,cg00505762,cg03783258,cg01680268,cg04137133,cg24936204,cg00669594	COL11A2	Body	N_Shelf=9	GO:0001501,skeletal system development|GO:0001501,skeletal system development|GO:0007605,sensory perception of sound|GO:0030199,collagen fibril organization|GO:0030574,collagen catabolic process|GO:0051216,cartilage development|GO:0060021,palate development|GO:0060023,soft palate development	GO:0005515,protein binding|GO:0030020,extracellular matrix structural constituent conferring tensile strength|GO:0030674,protein binding, bridging|GO:0046872,metal ion binding	GO:0005576,extracellular region|GO:0005592,collagen type XI trimer|GO:0005788,endoplasmic reticulum lumen	hsa04974 Protein digestion and absorption - Homo sapiens (human)	0.293333	0.15376	0.346539	0.252037	0.340612	0.681239	0.518679	0.58756	0.658242	0.675079	0.366774	0.515395	0.444432	0	0	0
DMR_46	6	149805995	149806659	664	11	cg03982376,cg13136655,cg06762457,cg07481398,cg09678939,cg00073460,cg04275695,cg18951352,cg15132169,cg17501395,cg18082788	ZC3H12D	TSS1500	opensea=11	GO:0061158,3'-UTR-mediated mRNA destabilization|GO:0090305,nucleic acid phosphodiester bond hydrolysis	GO:0004519,endonuclease activity|GO:0005515,protein binding|GO:0046872,metal ion binding	GO:0000932,P-body|GO:0005654,nucleoplasm|GO:0036464,cytoplasmic ribonucleoprotein granule		0.235	0.272356	0.288937	0.264728	0.367373	0.0973183	0.0866793	0.0595094	0.132777	0.171607	1.9982	3.68094	2.68728	0	0	0
DMR_47	4	24796514	24797176	662	10	cg10783026,cg16216407,cg03063309,cg11372436,cg21411366,cg17923553,cg16037589,cg03577139,cg23639734,cg08180187	SOD3	TSS1500	N_Shelf=2,opensea=8	GO:0001666,response to hypoxia|GO:0019430,removal of superoxide radicals|GO:0034599,cellular response to oxidative stress|GO:0046688,response to copper ion|GO:0055114,oxidation-reduction process	GO:0004784,superoxide dismutase activity|GO:0004784,superoxide dismutase activity|GO:0005507,copper ion binding|GO:0005515,protein binding|GO:0008201,heparin binding|GO:0008270,zinc ion binding	GO:0005576,extracellular region|GO:0005576,extracellular region|GO:0005615,extracellular space|GO:0005634,nucleus|GO:0005737,cytoplasm|GO:0005796,Golgi lumen|GO:0031012,extracellular matrix|GO:0031012,extracellular matrix|GO:0070062,extracellular exosome		0.0499859	0.0343116	0.0693945	0.0418723	0.0560449	0.131861	0.143293	0.0769236	0.214497	0.22975	0.146263	0.593484	0.293417	0	0	0
DMR_48	5	68710808	68711640	832	10	cg02505827,cg06998965,cg06418871,cg05901765,cg16419724,cg04091702,cg18663063,cg12687157,cg17019292,cg23220083	MARVELD2	TSS200	Island=9,S_Shore=1	GO:0007605,sensory perception of sound|GO:0045216,cell-cell junction organization|GO:0061028,establishment of endothelial barrier|GO:0070830,bicellular tight junction assembly	GO:0005515,protein binding	GO:0005737,cytoplasm|GO:0005923,bicellular tight junction|GO:0016021,integral component of membrane|GO:0016323,basolateral plasma membrane|GO:0016324,apical plasma membrane|GO:0030054,cell junction|GO:0031410,cytoplasmic vesicle|GO:0061689,tricellular tight junction	hsa04530 Tight junction - Homo sapiens (human)	0.0917656	0.060673	0.0738353	0.0799293	0.0873711	0.266704	0.220143	0.312241	0.280689	0.270502	0.202857	0.462446	0.282451	0	0	0
DMR_49	12	120241287	120242513	1226	10	cg03339668,cg18881778,cg26097051,cg02764093,cg04948014,cg21879102,cg20840795,cg24973993,cg14132388,cg10923838	CIT	Body	Island=2,N_Shore=4,S_Shore=4	GO:0000086,G2/M transition of mitotic cell cycle|GO:0000278,mitotic cell cycle|GO:0000281,mitotic cytokinesis|GO:0006468,protein phosphorylation|GO:0007030,Golgi organization|GO:0008064,regulation of actin polymerization or depolymerization|GO:0032467,positive regulation of cytokinesis|GO:0035556,intracellular signal transduction|GO:0048699,generation of neurons|GO:0051402,neuron apoptotic process	GO:0004674,protein serine/threonine kinase activity|GO:0005515,protein binding|GO:0005524,ATP binding|GO:0017048,Rho GTPase binding|GO:0017124,SH3 domain binding|GO:0030165,PDZ domain binding|GO:0046872,metal ion binding|GO:0097110,scaffold protein binding	GO:0005829,cytosol|GO:0005886,plasma membrane|GO:0016020,membrane|GO:0031985,Golgi cisterna|GO:0032154,cleavage furrow|GO:0043025,neuronal cell body		0.0645791	0.0343474	0.0865214	0.0376582	0.0532258	0.153433	0.16594	0.115395	0.23718	0.244404	0.146728	0.473339	0.298254	0	0	0
DMR_50	8	145047469	145048363	894	10	cg05141333,cg26549595,cg19733867,cg08455275,cg15183991,cg00886954,cg00575153,cg09649046,cg13527203,cg16720947	PLEC1,PLEC	TSS200	Island=10	,GO:0031581,hemidesmosome assembly|GO:0031581,hemidesmosome assembly	,GO:0003723,RNA binding|GO:0003779,actin binding|GO:0005515,protein binding|GO:0008307,structural constituent of muscle|GO:0030506,ankyrin binding|GO:0045296,cadherin binding	,GO:0005829,cytosol|GO:0005829,cytosol|GO:0005886,plasma membrane|GO:0005903,brush border|GO:0005925,focal adhesion|GO:0016528,sarcoplasm|GO:0030056,hemidesmosome|GO:0031012,extracellular matrix|GO:0042383,sarcolemma|GO:0043034,costamere|GO:0045111,intermediate filament cytoskeleton|GO:0070062,extracellular exosome		0.243089	0.208038	0.256695	0.249123	0.279192	0.51401	0.404884	0.436371	0.470606	0.443753	0.0970543	0.746918	0.424324	0	0	0
DMR_51	7	2802374	2803065	691	10	cg21143896,cg00947599,cg03459839,cg12444411,cg23285459,cg19524238,cg05793240,cg23333125,cg12102607,cg20884522	GNA12	TSS1500	Island=3,N_Shore=1,S_Shore=6	GO:0001701,in utero embryonic development|GO:0007186,G-protein coupled receptor signaling pathway|GO:0007188,adenylate cyclase-modulating G-protein coupled receptor signaling pathway|GO:0007266,Rho protein signal transduction|GO:0007596,blood coagulation|GO:0008360,regulation of cell shape|GO:0010762,regulation of fibroblast migration|GO:0030154,cell differentiation|GO:0030168,platelet activation…	GO:0003924,GTPase activity|GO:0003924,GTPase activity|GO:0004871,signal transducer activity|GO:0005515,protein binding|GO:0005525,GTP binding|GO:0031683,G-protein beta/gamma-subunit complex binding|GO:0031752,D5 dopamine receptor binding|GO:0046872,metal ion binding	GO:0005737,cytoplasm|GO:0005834,heterotrimeric G-protein complex|GO:0005886,plasma membrane|GO:0005925,focal adhesion|GO:0016328,lateral plasma membrane|GO:0031526,brush border membrane	hsa04010 MAPK signaling pathway - Homo sapiens (human)|hsa04022 cGMP-PKG signaling pathway - Homo sapiens (human)|hsa04071 Sphingolipid signaling pathway - Homo sapiens (human)|hsa04072 Phospholipase D signaling pathway - Homo sapiens (human)|hsa04270 Vascular smooth muscle contraction - Homo sapiens (human)|hsa04730 Long-term depression - Homo sapiens (human)|hsa04810 Regulation of actin cytoske…	0.486428	0.369919	0.497402	0.565849	0.596854	0.19582	0.193873	0.112496	0.263481	0.340903	1.63489	8.16097	2.96356	0	0	0
DMR_52	9	124989052	124990276	1224	11	cg13571460,cg11479503,cg05037505,cg21469772,cg15124400,cg00142257,cg21213617,cg13862711,cg05136264,cg03363289,cg04622888	LHX6	TSS200	Island=11	GO:0006351,transcription, DNA-templated|GO:0006355,regulation of transcription, DNA-templated|GO:0021799,cerebral cortex radially oriented cell migration|GO:0021800,cerebral cortex tangential migration|GO:0021853,cerebral cortex GABAergic interneuron migration|GO:0048469,cell maturation	GO:0003700,DNA binding transcription factor activity|GO:0005515,protein binding|GO:0043565,sequence-specific DNA binding|GO:0046872,metal ion binding	GO:0005634,nucleus		0.100232	0.0778268	0.119601	0.0826441	0.110146	0.23545	0.243528	0.169604	0.313734	0.332845	0.21374	0.681201	0.356866	0	0	0
DMR_53	11	1891699	1892307	608	10	cg26868156,cg22043296,cg24552015,cg15079934,cg08276062,cg21529477,cg27261733,cg20331155,cg09989681,cg17501754	LSP1	5'UTR	Island=7,N_Shore=3	GO:0006928,movement of cell or subcellular component|GO:0006935,chemotaxis|GO:0006968,cellular defense response|GO:0007165,signal transduction	GO:0003779,actin binding|GO:0004871,signal transducer activity	GO:0005886,plasma membrane|GO:0015629,actin cytoskeleton|GO:0016020,membrane|GO:0070062,extracellular exosome	hsa05152 Tuberculosis - Homo sapiens (human)	0.109796	0.0546309	0.129316	0.0596156	0.0763819	0.213376	0.248682	0.148034	0.325217	0.300291	0.216942	0.487403	0.323533	0	0	0
DMR_54	7	47694443	47694857	414	8	cg15978778,cg14825872,cg13447933,cg13164238,cg24941195,cg06203307,cg10519543,cg21289191	C7orf65	TSS1500	opensea=8					0.895635	0.912267	0.929147	0.912324	0.948365	0.65187	0.694978	0.581091	0.660841	0.787549	1.19338	1.66797	1.38033	0	0	0
DMR_55	2	223916417	223916912	495	10	cg16624485,cg02831419,cg26624703,cg09835085,cg21561492,cg14592092,cg00694520,cg08510940,cg08586500,cg12336457	KCNE4	TSS1500	N_Shore=10	GO:0034765,regulation of ion transmembrane transport|GO:0071805,potassium ion transmembrane transport	GO:0005249,voltage-gated potassium channel activity|GO:0005515,protein binding|GO:0044325,ion channel binding	GO:0016021,integral component of membrane|GO:0016324,apical plasma membrane		0.0504141	0.0311294	0.0669254	0.0385169	0.0669878	0.168992	0.16457	0.0923117	0.240598	0.277888	0.168309	0.38713	0.277501	0	0	0
DMR_56	1	149908085	149909124	1039	11	cg00339782,cg03659817,cg05750047,cg13476072,cg24620905,cg26645700,cg17353890,cg02086349,cg01331754,cg05576235,cg00777271	MTMR11	TSS1500	opensea=11			GO:0070062,extracellular exosome		0.0390747	0.0246256	0.0515925	0.0313507	0.0493412	0.0963129	0.101423	0.0536898	0.172538	0.190855	0.178773	0.487989	0.305009	0	0	0
DMR_57	17	77951408	77952463	1055	9	cg12314682,cg07506081,cg01303141,cg14787267,cg11209878,cg06856735,cg03582371,cg18658151,cg09780394	TBC1D16	Body	Island=4,N_Shore=2,S_Shore=3	GO:0001919,regulation of receptor recycling|GO:0006886,intracellular protein transport|GO:0031338,regulation of vesicle fusion|GO:0090630,activation of GTPase activity|GO:1902017,regulation of cilium assembly	GO:0005096,GTPase activator activity|GO:0005515,protein binding|GO:0017137,Rab GTPase binding	GO:0005769,early endosome|GO:0005829,cytosol		0.227115	0.219783	0.236644	0.197616	0.213197	0.456315	0.480781	0.475767	0.479124	0.515766	0.160251	0.831744	0.408197	0	0	0
DMR_58	17	27898757	27899966	1209	10	cg19991365,cg01580890,cg18330409,cg18618017,cg10972574,cg13381498,cg05877788,cg22141459,cg04498198,cg06772580	TP53I13	3'UTR	Island=3,N_Shore=7	GO:0009411,response to UV|GO:0014070,response to organic cyclic compound|GO:0042493,response to drug|GO:0045786,negative regulation of cell cycle	GO:0003674,molecular_function	GO:0005737,cytoplasm|GO:0005886,plasma membrane|GO:0016021,integral component of membrane		0.22496	0.164092	0.231399	0.172537	0.200852	0.379977	0.354316	0.336273	0.444506	0.44167	0.284509	0.748774	0.417267	0	0	0
DMR_59	11	121986736	121987265	529	8	cg13125488,cg22813542,cg11795976,cg17196933,cg27262870,cg15598802,cg03225882,cg16189093	LOC399959,BLID	TSS1500	opensea=8	,GO:0006915,apoptotic process|GO:0043280,positive regulation of cysteine-type endopeptidase activity involved in apoptotic process	,GO:0003674,molecular_function	,GO:0005739,mitochondrion|GO:0005829,cytosol		0.864982	0.868987	0.915458	0.874537	0.934642	0.626112	0.643799	0.579692	0.658256	0.809664	1.00562	1.60026	1.37941	0	0	0
DMR_60	13	36944294	36944649	355	8	cg21056788,cg21484515,cg00084432,cg09410612,cg15754752,cg13486491,cg05635923,cg09190748	SPG20	TSS1500	opensea=8					0.361503	0.281653	0.386911	0.262526	0.252533	0.698393	0.717003	0.734514	0.678087	0.653764	0.375133	0.523401	0.438854	0	0	0
DMR_61	12	7054989	7056008	1019	11	cg15975802,cg03457776,cg25719851,cg19287103,cg23974819,cg22335340,cg12690127,cg04956511,cg23193870,cg25196701,cg19022876	PTPN6,C12orf57	TSS1500	S_Shelf=1,S_Shore=10	GO:0002244,hematopoietic progenitor cell differentiation|GO:0002924,negative regulation of humoral immune response mediated by circulating immunoglobulin|GO:0006470,protein dephosphorylation|GO:0006915,apoptotic process|GO:0007186,G-protein coupled receptor signaling pathway|GO:0008283,cell proliferation|GO:0008284,positive regulation of cell proliferation|GO:0008285,negative regulation of cell p…	GO:0001784,phosphotyrosine residue binding|GO:0004725,protein tyrosine phosphatase activity|GO:0004725,protein tyrosine phosphatase activity|GO:0005001,transmembrane receptor protein tyrosine phosphatase activity|GO:0005515,protein binding|GO:0017124,SH3 domain binding|GO:0019901,protein kinase binding|GO:0042169,SH2 domain binding|GO:0050839,cell adhesion molecule binding,GO:0003674,molecular_fu…	GO:0005576,extracellular region|GO:0005634,nucleus|GO:0005730,nucleolus|GO:0005737,cytoplasm|GO:0005829,cytosol|GO:0005911,cell-cell junction|GO:0016020,membrane|GO:0035580,specific granule lumen|GO:0042105,alpha-beta T cell receptor complex|GO:0043234,protein complex|GO:0070062,extracellular exosome|GO:1904724,tertiary granule lumen,GO:0005737,cytoplasm	hsa04520 Adherens junction - Homo sapiens (human)|hsa04630 Jak-STAT signaling pathway - Homo sapiens (human)|hsa04650 Natural killer cell mediated cytotoxicity - Homo sapiens (human)|hsa04660 T cell receptor signaling pathway - Homo sapiens (human)|hsa04662 B cell receptor signaling pathway - Homo sapiens (human)|hsa05140 Leishmaniasis - Homo sapiens (human)|hsa05205 Proteoglycans in cancer - Hom…	0.345284	0.285217	0.322139	0.338626	0.338026	0.591837	0.51968	0.576547	0.522154	0.5045	0.319478	0.98965	0.518607	0	0	0
DMR_62	1	118727658	118728212	554	8	cg02623200,cg03850057,cg01105494,cg00830087,cg16240368,cg00310968,cg26100099,cg09497789	SPAG17	TSS1500	Island=6,N_Shore=1,S_Shore=1	GO:0003351,epithelial cilium movement|GO:1904158,axonemal central apparatus assembly		GO:0005654,nucleoplasm|GO:0005829,cytosol|GO:0005874,microtubule|GO:0031514,motile cilium|GO:1990716,axonemal central apparatus		0.0834187	0.0868425	0.10017	0.110575	0.14829	0.475586	0.244888	0.312452	0.329842	0.278087	0.188621	0.595476	0.282195	0	0	0
DMR_63	4	41614123	41614958	835	10	cg02951847,cg03128241,cg06348490,cg26799306,cg23966736,cg25349276,cg04605299,cg12848831,cg00957901,cg07696516	LIMCH1	TSS1500	opensea=10	GO:0031032,actomyosin structure organization	GO:0003779,actin binding|GO:0046872,metal ion binding			0.0371187	0.0277108	0.058302	0.0355798	0.0503073	0.116082	0.121174	0.0586038	0.189896	0.216318	0.174135	0.408556	0.296292	0	0	0
DMR_64	17	77997198	77997997	799	8	cg01835485,cg21048763,cg13615590,cg08940505,cg11864201,cg25532627,cg04615639,cg09675820	TBC1D16	5'UTR	Island=3,N_Shore=4,S_Shore=1	GO:0001919,regulation of receptor recycling|GO:0006886,intracellular protein transport|GO:0031338,regulation of vesicle fusion|GO:0090630,activation of GTPase activity|GO:1902017,regulation of cilium assembly	GO:0005096,GTPase activator activity|GO:0005515,protein binding|GO:0017137,Rab GTPase binding	GO:0005769,early endosome|GO:0005829,cytosol		0.221624	0.125919	0.254342	0.141797	0.182464	0.449108	0.442652	0.428746	0.487943	0.506546	0.179083	0.56144	0.365047	0	0	0
DMR_65	1	156211415	156212005	590	9	cg09996284,cg23729443,cg11519176,cg12036877,cg17419597,cg13282594,cg24843609,cg04356968,cg11580676	BGLAP	TSS1500	N_Shelf=9	GO:0001501,skeletal system development|GO:0001649,osteoblast differentiation|GO:0002076,osteoblast development|GO:0006465,signal peptide processing|GO:0006888,ER to Golgi vesicle-mediated transport|GO:0007155,cell adhesion|GO:0007569,cell aging|GO:0009612,response to mechanical stimulus|GO:0009629,response to gravity|GO:0010043,response to zinc ion|GO:0014823,response to activity|GO:0017187,pepti…	GO:0005198,structural molecule activity|GO:0005509,calcium ion binding|GO:0008147,structural constituent of bone|GO:0046848,hydroxyapatite binding	GO:0005615,extracellular space|GO:0005737,cytoplasm|GO:0005788,endoplasmic reticulum lumen|GO:0005791,rough endoplasmic reticulum|GO:0005796,Golgi lumen|GO:0030425,dendrite|GO:0031982,vesicle|GO:0043204,perikaryon		0.628488	0.618954	0.645747	0.690506	0.741801	0.369726	0.312606	0.272898	0.442564	0.474549	1.23233	3.25998	2.10998	0	0	0
DMR_66	17	72619556	72620274	718	9	cg18133309,cg13018120,cg14438208,cg17947198,cg03533256,cg05743220,cg09648424,cg04995095,cg10131481	CD300E	TSS1500	opensea=9	GO:0045087,innate immune response|GO:0050776,regulation of immune response		GO:0005886,plasma membrane|GO:0016021,integral component of membrane|GO:0070062,extracellular exosome		0.617975	0.665598	0.614148	0.725821	0.710584	0.347574	0.317647	0.270863	0.408882	0.377077	1.13704	11.3421	3.47547	0	0	0
DMR_67	3	196065189	196065688	499	10	cg22496559,cg21090033,cg01883662,cg21845080,cg13605674,cg05445326,cg13314965,cg23250593,cg15044270,cg02322879	TM4SF19	TSS1500	opensea=10			GO:0016021,integral component of membrane		0.655257	0.703867	0.691446	0.716055	0.768728	0.403465	0.365174	0.316178	0.483986	0.522951	1.1768	2.19054	1.79239	0	0	0
DMR_68	15	67457584	67458665	1081	10	cg06432320,cg17092065,cg07110488,cg26913446,cg01710852,cg22589511,cg19880823,cg13331691,cg13042808,cg26876701	SMAD3	TSS1500	opensea=10	GO:0000122,negative regulation of transcription from RNA polymerase II promoter|GO:0000122,negative regulation of transcription from RNA polymerase II promoter|GO:0000122,negative regulation of transcription from RNA polymerase II promoter|GO:0001657,ureteric bud development|GO:0001666,response to hypoxia|GO:0001701,in utero embryonic development|GO:0001707,mesoderm formation|GO:0001756,somitogen…	GO:0000978,RNA polymerase II proximal promoter sequence-specific DNA binding|GO:0000983,transcription factor activity, RNA polymerase II core promoter sequence-specific DNA binding|GO:0000983,transcription factor activity, RNA polymerase II core promoter sequence-specific DNA binding|GO:0000987,proximal promoter sequence-specific DNA binding|GO:0000988,transcription factor activity, protein bindi…	GO:0000790,nuclear chromatin|GO:0005634,nucleus|GO:0005637,nuclear inner membrane|GO:0005654,nucleoplasm|GO:0005654,nucleoplasm|GO:0005667,transcription factor complex|GO:0005737,cytoplasm|GO:0005829,cytosol|GO:0005829,cytosol|GO:0005886,plasma membrane|GO:0043235,receptor complex|GO:0071141,SMAD protein complex|GO:0071144,SMAD2-SMAD3 protein complex	hsa04068 FoxO signaling pathway - Homo sapiens (human)|hsa04110 Cell cycle - Homo sapiens (human)|hsa04144 Endocytosis - Homo sapiens (human)|hsa04310 Wnt signaling pathway - Homo sapiens (human)|hsa04350 TGF-beta signaling pathway - Homo sapiens (human)|hsa04371 Apelin signaling pathway - Homo sapiens (human)|hsa04390 Hippo signaling pathway - Homo sapiens (human)|hsa04520 Adherens junction - Ho…	0.14452	0.0948963	0.153614	0.104872	0.151905	0.267103	0.260204	0.197229	0.318067	0.352189	0.167189	0.964633	0.39196	0	0	0
DMR_69	2	102802929	102803787	858	10	cg23173746,cg24394667,cg19888792,cg13779009,cg08023416,cg18392357,cg22797169,cg21181713,cg14837955,cg15077070	IL1RL2	TSS1500	Island=3,N_Shore=7	GO:0006954,inflammatory response|GO:0006968,cellular defense response|GO:0007165,signal transduction|GO:0032755,positive regulation of interleukin-6 production|GO:0045087,innate immune response|GO:0045582,positive regulation of T cell differentiation|GO:0050727,regulation of inflammatory response|GO:0070498,interleukin-1-mediated signaling pathway	GO:0004908,interleukin-1 receptor activity|GO:0004909,interleukin-1, Type I, activating receptor activity	GO:0005886,plasma membrane|GO:0005887,integral component of plasma membrane		0.203721	0.19099	0.222005	0.205669	0.216341	0.329673	0.315712	0.28436	0.403733	0.407845	0.229546	0.962483	0.434442	0	0	0
DMR_70	16	86714536	86715554	1018	9	cg01063579,cg00622128,cg00962707,cg02974204,cg05626644,cg02464866,cg01627212,cg02128086,cg09310733		IGR	Island=3,N_Shore=4,S_Shore=2					0.525508	0.610143	0.516179	0.631187	0.670353	0.243895	0.256614	0.17166	0.347823	0.406194	1.65641	2.58927	2.1143	0	0	0
DMR_71	12	110252596	110253166	570	10	cg15422585,cg19698870,cg18587922,cg12765716,cg17132854,cg26358374,cg17228497,cg12265929,cg24706115,cg26603798	TRPV4	TSS1500	opensea=10	GO:0000122,negative regulation of transcription from RNA polymerase II promoter|GO:0002024,diet induced thermogenesis|GO:0006816,calcium ion transport|GO:0006816,calcium ion transport|GO:0006874,cellular calcium ion homeostasis|GO:0006884,cell volume homeostasis|GO:0007015,actin filament organization|GO:0007015,actin filament organization|GO:0007043,cell-cell junction assembly|GO:0007204,positive…	GO:0003779,actin binding|GO:0005034,osmosensor activity|GO:0005080,protein kinase C binding|GO:0005261,cation channel activity|GO:0005262,calcium channel activity|GO:0005262,calcium channel activity|GO:0005515,protein binding|GO:0005516,calmodulin binding|GO:0005524,ATP binding|GO:0008017,microtubule binding|GO:0015275,stretch-activated, cation-selective, calcium channel activity|GO:0019901,prote…	GO:0005881,cytoplasmic microtubule|GO:0005886,plasma membrane|GO:0005886,plasma membrane|GO:0005886,plasma membrane|GO:0005887,integral component of plasma membrane|GO:0005912,adherens junction|GO:0005925,focal adhesion|GO:0005929,cilium|GO:0009986,cell surface|GO:0016021,integral component of membrane|GO:0016324,apical plasma membrane|GO:0030027,lamellipodium|GO:0030175,filopodium|GO:0030426,gro…	hsa04750 Inflammatory mediator regulation of TRP channels - Homo sapiens (human)|hsa05418 Fluid shear stress and atherosclerosis - Homo sapiens (human)	0.170701	0.101725	0.223717	0.153845	0.201622	0.415129	0.337378	0.316171	0.383241	0.42406	0.327873	0.892097	0.474067	0	0	0
DMR_72	2	238322274	238323400	1126	10	cg04869122,cg01409709,cg12167879,cg05688616,cg00573606,cg26278699,cg11388437,cg24075591,cg25591469,cg08950375	COL6A3	TSS1500	opensea=10	GO:0007155,cell adhesion|GO:0007517,muscle organ development|GO:0010951,negative regulation of endopeptidase activity|GO:0030198,extracellular matrix organization|GO:0030574,collagen catabolic process	GO:0004867,serine-type endopeptidase inhibitor activity	GO:0005576,extracellular region|GO:0005576,extracellular region|GO:0005578,proteinaceous extracellular matrix|GO:0005589,collagen type VI trimer|GO:0005615,extracellular space|GO:0005788,endoplasmic reticulum lumen|GO:0031012,extracellular matrix|GO:0031012,extracellular matrix|GO:0031012,extracellular matrix|GO:0042383,sarcolemma|GO:0070062,extracellular exosome|GO:1903561,extracellular vesicle	hsa04151 PI3K-Akt signaling pathway - Homo sapiens (human)|hsa04510 Focal adhesion - Homo sapiens (human)|hsa04512 ECM-receptor interaction - Homo sapiens (human)|hsa04974 Protein digestion and absorption - Homo sapiens (human)	0.101713	0.0862912	0.121635	0.0983787	0.124275	0.188038	0.178141	0.139699	0.267139	0.291757	0.231289	1.1158	0.380032	0	0	0
DMR_73	19	10928172	10928696	524	9	cg23068797,cg23047544,cg06754197,cg02660440,cg18544365,cg02907064,cg13965612,cg03216043,cg27648270	DNM2,MIR199A1	TSS200	opensea=9	GO:0000086,G2/M transition of mitotic cell cycle|GO:0000266,mitochondrial fission|GO:0002031,G-protein coupled receptor internalization|GO:0003281,ventricular septum development|GO:0003374,dynamin family protein polymerization involved in mitochondrial fission|GO:0006355,regulation of transcription, DNA-templated|GO:0006893,Golgi to plasma membrane transport|GO:0006897,endocytosis|GO:0006898,rece…	GO:0003924,GTPase activity|GO:0003924,GTPase activity|GO:0003924,GTPase activity|GO:0005515,protein binding|GO:0005525,GTP binding|GO:0008017,microtubule binding|GO:0008017,microtubule binding|GO:0017124,SH3 domain binding|GO:0019899,enzyme binding|GO:0019901,protein kinase binding|GO:0031749,D2 dopamine receptor binding|GO:0032403,protein complex binding|GO:0036312,phosphatidylinositol 3-kinase …	GO:0000139,Golgi membrane|GO:0001891,phagocytic cup|GO:0001917,photoreceptor inner segment|GO:0005634,nucleus|GO:0005768,endosome|GO:0005794,Golgi apparatus|GO:0005802,trans-Golgi network|GO:0005813,centrosome|GO:0005829,cytosol|GO:0005829,cytosol|GO:0005874,microtubule|GO:0005886,plasma membrane|GO:0005905,clathrin-coated pit|GO:0005925,focal adhesion|GO:0014069,postsynaptic density|GO:0030027,l…	hsa04072 Phospholipase D signaling pathway - Homo sapiens (human)|hsa04144 Endocytosis - Homo sapiens (human)|hsa04666 Fc gamma R-mediated phagocytosis - Homo sapiens (human)|hsa04721 Synaptic vesicle cycle - Homo sapiens (human)|hsa04961 Endocrine and other factor-regulated calcium reabsorption - Homo sapiens (human)|hsa05100 Bacterial invasion of epithelial cells - Homo sapiens (human),hsa05206…	0.0880982	0.0521032	0.114726	0.063055	0.0940524	0.217767	0.219122	0.137188	0.299607	0.325034	0.226962	0.485878	0.328652	0	0	0
DMR_74	12	133424221	133424943	722	8	cg21232015,cg18451156,cg20066677,cg02519218,cg09120938,cg24532476,cg17445453,cg11989218	CHFR	Body	opensea=8	GO:0000209,protein polyubiquitination|GO:0006511,ubiquitin-dependent protein catabolic process|GO:0007093,mitotic cell cycle checkpoint|GO:0007093,mitotic cell cycle checkpoint|GO:0019941,modification-dependent protein catabolic process|GO:0031398,positive regulation of protein ubiquitination|GO:0031648,protein destabilization|GO:0032436,positive regulation of proteasomal ubiquitin-dependent prot…	GO:0000166,nucleotide binding|GO:0004842,ubiquitin-protein transferase activity|GO:0005515,protein binding|GO:0046872,metal ion binding|GO:0061630,ubiquitin protein ligase activity	GO:0005634,nucleus|GO:0016605,PML body		0.55249	0.398614	0.561178	0.467617	0.523506	0.810285	0.724202	0.77701	0.807329	0.789229	0.387957	0.984492	0.607049	0	0	0
DMR_75	12	113415883	113416518	635	8	cg12560128,cg03996150,cg00085448,cg20870559,cg19371652,cg04880620,cg11318133,cg11601443	OAS2	TSS1500	opensea=8	GO:0006139,nucleobase-containing compound metabolic process|GO:0006401,RNA catabolic process|GO:0006486,protein glycosylation|GO:0009615,response to virus|GO:0018377,protein myristoylation|GO:0051607,defense response to virus|GO:0060333,interferon-gamma-mediated signaling pathway|GO:0060337,type I interferon signaling pathway	GO:0001730,2'-5'-oligoadenylate synthetase activity|GO:0001730,2'-5'-oligoadenylate synthetase activity|GO:0003725,double-stranded RNA binding|GO:0003725,double-stranded RNA binding|GO:0005515,protein binding|GO:0005524,ATP binding|GO:0046872,metal ion binding	GO:0005654,nucleoplasm|GO:0005739,mitochondrion|GO:0005783,endoplasmic reticulum|GO:0005829,cytosol|GO:0005829,cytosol|GO:0016020,membrane|GO:0043231,intracellular membrane-bounded organelle|GO:0048471,perinuclear region of cytoplasm	hsa04621 NOD-like receptor signaling pathway - Homo sapiens (human)|hsa05160 Hepatitis C - Homo sapiens (human)|hsa05162 Measles - Homo sapiens (human)|hsa05164 Influenza A - Homo sapiens (human)|hsa05168 Herpes simplex infection - Homo sapiens (human)	0.502513	0.505721	0.532476	0.493831	0.570393	0.254456	0.248046	0.221118	0.298424	0.319321	1.13806	6.28155	3.40849	0	0	0
DMR_76	8	134114892	134115653	761	9	cg02951514,cg11621211,cg13396967,cg11155356,cg17055993,cg08048527,cg22226832,cg01333535,cg01064758	TG,SLA	TSS1500	opensea=9	GO:0007165,signal transduction|GO:0010469,regulation of receptor activity|GO:0015705,iodide transport|GO:0030878,thyroid gland development|GO:0031641,regulation of myelination|GO:0042403,thyroid hormone metabolic process|GO:0042446,hormone biosynthetic process,GO:0007169,transmembrane receptor protein tyrosine kinase signaling pathway|GO:0009967,positive regulation of signal transduction|GO:00164…	GO:0005179,hormone activity,GO:0004715,non-membrane spanning protein tyrosine kinase activity|GO:0005070,SH3/SH2 adaptor activity|GO:0005102,receptor binding|GO:0005515,protein binding	GO:0005576,extracellular region|GO:0005615,extracellular space,GO:0005768,endosome|GO:0031234,extrinsic component of cytoplasmic side of plasma membrane	hsa04918 Thyroid hormone synthesis - Homo sapiens (human)|hsa05320 Autoimmune thyroid disease - Homo sapiens (human),	0.327266	0.280049	0.324178	0.313188	0.30012	0.533291	0.530978	0.492848	0.530807	0.52362	0.251429	0.860921	0.490491	0	0	0
DMR_77	16	67197084	67197640	556	9	cg05436064,cg07816687,cg20291548,cg18705279,cg26870771,cg03456938,cg09030672,cg25146597,cg23414876	HSF4,FBXL8	TSS1500	Island=9	GO:0000122,negative regulation of transcription from RNA polymerase II promoter|GO:0006351,transcription, DNA-templated|GO:0006355,regulation of transcription, DNA-templated|GO:0007601,visual perception|GO:0008284,positive regulation of cell proliferation|GO:0033169,histone H3-K9 demethylation|GO:0043010,camera-type eye development|GO:0045597,positive regulation of cell differentiation|GO:0045944…	GO:0003700,DNA binding transcription factor activity|GO:0003714,transcription corepressor activity|GO:0043565,sequence-specific DNA binding,GO:0004842,ubiquitin-protein transferase activity|GO:0004842,ubiquitin-protein transferase activity|GO:0005515,protein binding	GO:0016607,nuclear speck,GO:0005829,cytosol		0.126301	0.0946858	0.125423	0.171453	0.185042	0.441186	0.307279	0.330854	0.341757	0.333693	0.277839	0.523529	0.394907	0	0	0
DMR_78	5	140864020	140864834	814	8	cg12145907,cg19759129,cg23445461,cg02022733,cg15949044,cg12648074,cg06428620,cg26890354	PCDHGA4,PCDHGC4	TSS1500	Island=3,N_Shore=4,S_Shore=1	GO:0007155,cell adhesion|GO:0007156,homophilic cell adhesion via plasma membrane adhesion molecules|GO:0007267,cell-cell signaling|GO:0007399,nervous system development,GO:0007155,cell adhesion|GO:0007156,homophilic cell adhesion via plasma membrane adhesion molecules|GO:0007267,cell-cell signaling|GO:0007399,nervous system development|GO:0050808,synapse organization	GO:0005509,calcium ion binding	GO:0005887,integral component of plasma membrane		0.110238	0.116998	0.123687	0.118013	0.136779	0.411607	0.351415	0.396162	0.295607	0.297066	0.258074	0.523783	0.347564	0	0	0
DMR_79	2	74779799	74780617	818	9	cg00831247,cg08940570,cg19148731,cg11067786,cg15989091,cg13004765,cg25142466,cg23674882,cg25792271	LOXL3	5'UTR	N_Shore=9	GO:0001837,epithelial to mesenchymal transition|GO:0006898,receptor-mediated endocytosis|GO:0006954,inflammatory response|GO:0018057,peptidyl-lysine oxidation|GO:0021510,spinal cord development|GO:0030324,lung development|GO:0045892,negative regulation of transcription, DNA-templated|GO:0060021,palate development|GO:0061053,somite development|GO:1905590,fibronectin fibril organization|GO:2000329,…	GO:0001968,fibronectin binding|GO:0004720,protein-lysine 6-oxidase activity|GO:0004720,protein-lysine 6-oxidase activity|GO:0005044,scavenger receptor activity|GO:0005507,copper ion binding|GO:0005515,protein binding	GO:0005576,extracellular region|GO:0005615,extracellular space|GO:0005634,nucleus|GO:0005634,nucleus|GO:0005737,cytoplasm|GO:0016020,membrane		0.0833286	0.0799247	0.151708	0.0889769	0.151955	0.269436	0.20171	0.171853	0.332822	0.377052	0.206263	0.60157	0.37622	0	0	0
DMR_80	10	3146205	3147056	851	7	cg15228268,cg19416623,cg26693553,cg12124955,cg24250653,cg22233648,cg11250692	PFKP	Body	Island=1,N_Shore=6	GO:0006002,fructose 6-phosphate metabolic process|GO:0061621,canonical glycolysis|GO:1990830,cellular response to leukemia inhibitory factor	GO:0003872,6-phosphofructokinase activity|GO:0003872,6-phosphofructokinase activity|GO:0003872,6-phosphofructokinase activity|GO:0005524,ATP binding|GO:0032403,protein complex binding|GO:0045296,cadherin binding|GO:0046872,metal ion binding	GO:0005634,nucleus|GO:0005737,cytoplasm|GO:0005829,cytosol|GO:0016020,membrane|GO:0031012,extracellular matrix|GO:0070062,extracellular exosome	hsa00010 Glycolysis / Gluconeogenesis - Homo sapiens (human)|hsa00030 Pentose phosphate pathway - Homo sapiens (human)|hsa00051 Fructose and mannose metabolism - Homo sapiens (human)|hsa00052 Galactose metabolism - Homo sapiens (human)|hsa01100 Metabolic pathways - Homo sapiens (human)|hsa01200 Carbon metabolism - Homo sapiens (human)|hsa01230 Biosynthesis of amino acids - Homo sapiens (human)|hs…	0.13251	0.10288	0.161824	0.113924	0.166095	0.355987	0.288949	0.272884	0.367478	0.395332	0.168476	0.746465	0.310705	0	0	0
DMR_81	17	2169272	2169989	717	8	cg09409898,cg25154055,cg01036611,cg03700670,cg23218897,cg23362937,cg02976056,cg07350732	SMG6	TSS1500	opensea=8	GO:0000184,nuclear-transcribed mRNA catabolic process, nonsense-mediated decay|GO:0000184,nuclear-transcribed mRNA catabolic process, nonsense-mediated decay|GO:0006406,mRNA export from nucleus|GO:0032204,regulation of telomere maintenance|GO:0032210,regulation of telomere maintenance via telomerase|GO:0032210,regulation of telomere maintenance via telomerase|GO:0035303,regulation of dephosphoryl…	GO:0003723,RNA binding|GO:0004521,endoribonuclease activity|GO:0004521,endoribonuclease activity|GO:0004521,endoribonuclease activity|GO:0005515,protein binding|GO:0042162,telomeric DNA binding|GO:0046872,metal ion binding|GO:0070034,telomerase RNA binding|GO:0070182,DNA polymerase binding	GO:0000333,telomerase catalytic core complex|GO:0000781,chromosome, telomeric region|GO:0005634,nucleus|GO:0005697,telomerase holoenzyme complex|GO:0005730,nucleolus|GO:0005737,cytoplasm|GO:0005829,cytosol|GO:0005829,cytosol|GO:0035145,exon-exon junction complex	hsa03015 mRNA surveillance pathway - Homo sapiens (human)	0.660937	0.716049	0.706587	0.815017	0.873829	0.481629	0.318092	0.271577	0.599405	0.616375	1.04568	2.35973	1.78072	0	0	0
DMR_82	7	22233159	22233634	475	8	cg12593515,cg24092655,cg00713400,cg24903094,cg15965643,cg20583679,cg17251781,cg06000564	RAPGEF5	Body	opensea=8	GO:0007264,small GTPase mediated signal transduction|GO:0007399,nervous system development|GO:0065009,regulation of molecular function	GO:0005088,Ras guanyl-nucleotide exchange factor activity|GO:0017034,Rap guanyl-nucleotide exchange factor activity|GO:0030742,GTP-dependent protein binding	GO:0005634,nucleus|GO:0005654,nucleoplasm|GO:0016604,nuclear body	hsa04014 Ras signaling pathway - Homo sapiens (human)|hsa04015 Rap1 signaling pathway - Homo sapiens (human)	0.0760727	0.0651039	0.0985439	0.0710697	0.0903409	0.201545	0.207331	0.13307	0.264681	0.288686	0.20842	0.735632	0.325152	0	0	0
DMR_83	5	72595322	72596188	866	8	cg21082400,cg06159353,cg03638905,cg08893692,cg22120063,cg09884076,cg12505170,cg18750738		IGR	Island=6,S_Shore=2					0.705443	0.706664	0.699731	0.706406	0.728868	0.400476	0.492758	0.448229	0.47624	0.535837	1.13094	2.15098	1.52106	0	0	0
DMR_84	1	172113506	172114068	562	8	cg02633729,cg25214966,cg01006503,cg21450888,cg24002149,cg19219378,cg17178220,cg09281118	DNM3,MIR199A2,DNM3OS	TSS200	opensea=8	GO:0000266,mitochondrial fission|GO:0003374,dynamin family protein polymerization involved in mitochondrial fission|GO:0006897,endocytosis|GO:0007416,synapse assembly|GO:0016185,synaptic vesicle budding from presynaptic endocytic zone membrane|GO:0046847,filopodium assembly|GO:0051491,positive regulation of filopodium assembly|GO:0061002,negative regulation of dendritic spine morphogenesis|GO:006…	GO:0003924,GTPase activity|GO:0003924,GTPase activity|GO:0005515,protein binding|GO:0005525,GTP binding|GO:0008017,microtubule binding|GO:0031798,type 1 metabotropic glutamate receptor binding|GO:0031802,type 5 metabotropic glutamate receptor binding|GO:0050998,nitric-oxide synthase binding,GO:1903231,mRNA binding involved in posttranscriptional gene silencing,	GO:0001917,photoreceptor inner segment|GO:0005794,Golgi apparatus|GO:0005874,microtubule|GO:0014069,postsynaptic density|GO:0030424,axon|GO:0031966,mitochondrial membrane|GO:0043083,synaptic cleft|GO:0043197,dendritic spine|GO:0044327,dendritic spine head|GO:0048471,perinuclear region of cytoplasm|GO:0070062,extracellular exosome|GO:0098844,postsynaptic endocytic zone membrane,GO:0005615,extracel…	hsa04072 Phospholipase D signaling pathway - Homo sapiens (human)|hsa04144 Endocytosis - Homo sapiens (human)|hsa04721 Synaptic vesicle cycle - Homo sapiens (human)|hsa04961 Endocrine and other factor-regulated calcium reabsorption - Homo sapiens (human)|hsa05100 Bacterial invasion of epithelial cells - Homo sapiens (human),hsa05206 MicroRNAs in cancer - Homo sapiens (human),	0.0545116	0.0284086	0.0710725	0.0371629	0.0556205	0.132722	0.138852	0.0760714	0.237978	0.249928	0.225825	0.377008	0.29551	0	0	0
DMR_85	15	74466704	74467432	728	7	cg11335960,cg10666013,cg12719753,cg24779381,cg03778780,cg14268839,cg26800986	ISLR	TSS200	N_Shore=7	GO:0002576,platelet degranulation|GO:0007155,cell adhesion		GO:0005576,extracellular region|GO:0031093,platelet alpha granule lumen|GO:0070062,extracellular exosome		0.0878816	0.058036	0.104271	0.0699577	0.0867747	0.201095	0.204588	0.13091	0.28413	0.296932	0.190542	0.722812	0.307894	0	0	0
DMR_86	10	77871618	77872458	840	8	cg21056220,cg25830307,cg08481464,cg10658779,cg24280832,cg04850999,cg05496768,cg26575622	C10orf11	Body	Island=2,N_Shore=5,S_Shore=1					0.313591	0.348949	0.327929	0.323545	0.356661	0.640605	0.631895	0.578822	0.561286	0.559969	0.256661	0.923588	0.490139	0	0	0
DMR_87	19	18761132	18761792	660	8	cg18499339,cg27652490,cg24233679,cg17126026,cg25129523,cg25102449,cg18404706,cg19839325	KLHL26	Body	Island=6,N_Shore=1,S_Shore=1	GO:0007286,spermatid development|GO:0008584,male gonad development|GO:0009566,fertilization|GO:0016567,protein ubiquitination	GO:0004842,ubiquitin-protein transferase activity	GO:0005737,cytoplasm|GO:0031463,Cul3-RING ubiquitin ligase complex		0.0600706	0.0327443	0.0833516	0.0410072	0.0763022	0.159395	0.163416	0.0852092	0.242735	0.273846	0.186673	0.490078	0.318949	0	0	0
DMR_88	7	135433540	135434050	510	8	cg05618401,cg09197672,cg19238824,cg10725344,cg22621652,cg01548463,cg19689368,cg11015893	FAM180A	TSS1500	opensea=8			GO:0005576,extracellular region		0.0715677	0.0543935	0.095871	0.0586779	0.0806265	0.184843	0.182186	0.131048	0.268545	0.289069	0.167051	0.673058	0.291552	0	0	0
DMR_89	1	161171116	161171632	516	6	cg24049880,cg08850169,cg01643203,cg00797801,cg05656486,cg23274951	NDUFS2	TSS1500	N_Shore=6	GO:0006120,mitochondrial electron transport, NADH to ubiquinone|GO:0006120,mitochondrial electron transport, NADH to ubiquinone|GO:0006979,response to oxidative stress|GO:0032981,mitochondrial respiratory chain complex I assembly|GO:0042775,mitochondrial ATP synthesis coupled electron transport	GO:0003954,NADH dehydrogenase activity|GO:0005515,protein binding|GO:0008137,NADH dehydrogenase (ubiquinone) activity|GO:0009055,electron transfer activity|GO:0031625,ubiquitin protein ligase binding|GO:0046872,metal ion binding|GO:0048038,quinone binding|GO:0051287,NAD binding|GO:0051539,4 iron, 4 sulfur cluster binding	GO:0005654,nucleoplasm|GO:0005739,mitochondrion|GO:0005739,mitochondrion|GO:0005747,mitochondrial respiratory chain complex I|GO:0005747,mitochondrial respiratory chain complex I|GO:0005747,mitochondrial respiratory chain complex I|GO:0005759,mitochondrial matrix	hsa00190 Oxidative phosphorylation - Homo sapiens (human)|hsa01100 Metabolic pathways - Homo sapiens (human)|hsa04723 Retrograde endocannabinoid signaling - Homo sapiens (human)|hsa04932 Non-alcoholic fatty liver disease (NAFLD) - Homo sapiens (human)|hsa05010 Alzheimer's disease - Homo sapiens (human)|hsa05012 Parkinson's disease - Homo sapiens (human)|hsa05016 Huntington's disease - Homo sapien…	0.440583	0.492126	0.441166	0.510181	0.54004	0.105699	0.193728	0.0847985	0.169713	0.261378	1.68944	5.58391	3.55471	0	0	0
DMR_90	3	191048308	191048840	532	8	cg06694446,cg07647691,cg14855367,cg13506158,cg00591949,cg11032095,cg27269488,cg21578720	CCDC50,UTS2B,UTS2D	TSS1500	S_Shore=8	GO:0007605,sensory perception of sound,GO:0007186,G-protein coupled receptor signaling pathway|GO:0008217,regulation of blood pressure|GO:0010469,regulation of receptor activity|GO:0097746,regulation of blood vessel diameter,	GO:0005515,protein binding|GO:0031625,ubiquitin protein ligase binding,GO:0001664,G-protein coupled receptor binding|GO:0005179,hormone activity,	GO:0005829,cytosol,GO:0005576,extracellular region,		0.147497	0.145986	0.175275	0.130036	0.156813	0.228597	0.236333	0.224699	0.311762	0.343594	0.138294	0.927357	0.39716	0	0	0
DMR_91	10	695844	696063	219	6	cg11722581,cg17198320,cg01263942,cg05585149,cg07469445,cg01573089	DIP2C	Body	opensea=6	GO:0008150,biological_process|GO:0008152,metabolic process	GO:0003674,molecular_function|GO:0003824,catalytic activity	GO:0005575,cellular_component		0.250996	0.162513	0.245882	0.213728	0.258102	0.585264	0.453114	0.59445	0.591323	0.580107	0.300896	0.551297	0.386875	0	0	0
DMR_92	4	123747447	123747750	303	7	cg24683623,cg03941587,cg11327857,cg21550024,cg17214107,cg15128226,cg04332818	FGF2	TSS1500	Island=1,N_Shore=6	GO:0000165,MAPK cascade|GO:0000187,activation of MAPK activity|GO:0001658,branching involved in ureteric bud morphogenesis|GO:0001938,positive regulation of endothelial cell proliferation|GO:0001938,positive regulation of endothelial cell proliferation|GO:0002042,cell migration involved in sprouting angiogenesis|GO:0002042,cell migration involved in sprouting angiogenesis|GO:0006661,phosphatidyli…	GO:0004713,protein tyrosine kinase activity|GO:0005088,Ras guanyl-nucleotide exchange factor activity|GO:0005104,fibroblast growth factor receptor binding|GO:0005125,cytokine activity|GO:0005515,protein binding|GO:0008083,growth factor activity|GO:0008201,heparin binding|GO:0016303,1-phosphatidylinositol-3-kinase activity|GO:0030374,ligand-dependent nuclear receptor transcription coactivator acti…	GO:0005576,extracellular region|GO:0005615,extracellular space|GO:0005634,nucleus	hsa01521 EGFR tyrosine kinase inhibitor resistance - Homo sapiens (human)|hsa04010 MAPK signaling pathway - Homo sapiens (human)|hsa04014 Ras signaling pathway - Homo sapiens (human)|hsa04015 Rap1 signaling pathway - Homo sapiens (human)|hsa04151 PI3K-Akt signaling pathway - Homo sapiens (human)|hsa04550 Signaling pathways regulating pluripotency of stem cells - Homo sapiens (human)|hsa04810 Regu…	0.0356578	0.029449	0.0408378	0.0309049	0.0394479	0.111418	0.101505	0.0683466	0.156574	0.144036	0.146651	0.766311	0.324639	0	0	0
DMR_93	16	58328846	58329456	610	7	cg16781880,cg11751848,cg13222634,cg05102425,cg09462089,cg25958850,cg20352022	KLKBL4,PRSS54	TSS1500	opensea=7	,GO:0006508,proteolysis	,GO:0004252,serine-type endopeptidase activity	,GO:0005576,extracellular region		0.0610898	0.0359355	0.0786402	0.0470439	0.0553377	0.155015	0.156842	0.0995101	0.263806	0.258756	0.23028	0.416425	0.29143	0	0	0
DMR_94	15	86338692	86338884	192	4	cg13400365,cg00664106,cg15529542,cg13900350	KLHL25	TSS1500	S_Shore=4	GO:0006446,regulation of translational initiation|GO:0016567,protein ubiquitination|GO:0042787,protein ubiquitination involved in ubiquitin-dependent protein catabolic process|GO:0043687,post-translational protein modification		GO:0005737,cytoplasm|GO:0005829,cytosol|GO:0031463,Cul3-RING ubiquitin ligase complex		0.210085	0.178947	0.206389	0.205279	0.221686	0.192764	0.208916	0.153295	0.27677	0.31018	0.186006	1.23399	0.464414	0	0	0
DMR_95	13	107029123	107029443	320	4	cg01027209,cg13822911,cg02205193,cg19205281	,LINC00460	Body	opensea=4					0.824398	0.836014	0.847269	0.861376	0.907724	0.723619	0.661679	0.64962	0.713388	0.81869	1.06612	1.25136	1.19026	0	0	0
DMR_96	2	145276986	145278152	1166	15	cg05322294,cg03625547,cg14022841,cg26522240,cg01497214,cg04836221,cg07246225,cg23639412,cg19101754,cg09670616,cg19123296,cg03424727,cg24488281,cg15377518,cg14421309	ZEB2-AS1,ZEB2	TSS200	N_Shelf=5,S_Shelf=7,S_Shore=3	,GO:0000122,negative regulation of transcription from RNA polymerase II promoter|GO:0000122,negative regulation of transcription from RNA polymerase II promoter|GO:0001755,neural crest cell migration|GO:0001756,somitogenesis|GO:0001843,neural tube closure|GO:0006366,transcription from RNA polymerase II promoter|GO:0007399,nervous system development|GO:0021540,corpus callosum morphogenesis|GO:0021…	,GO:0001205,transcriptional activator activity, RNA polymerase II distal enhancer sequence-specific DNA binding|GO:0001227,transcriptional repressor activity, RNA polymerase II transcription regulatory region sequence-specific DNA binding|GO:0005515,protein binding|GO:0019208,phosphatase regulator activity|GO:0043565,sequence-specific DNA binding|GO:0046872,metal ion binding|GO:0070412,R-SMAD bin…	,GO:0000790,nuclear chromatin|GO:0005634,nucleus|GO:0005730,nucleolus|GO:0005829,cytosol	,hsa05206 MicroRNAs in cancer - Homo sapiens (human)	0.108094	0.143197	0.103991	0.125901	0.131989	0.0395362	0.0438357	0.030973	0.0412627	0.0418999	1.23985	5.46035	2.85361	8.60593e-06	0.000387869	0.00348722
DMR_97	7	27154262	27155548	1286	18	cg21556281,cg07942135,cg22798849,cg16644023,cg04351734,cg18680977,cg16406967,cg15982700,cg07917150,cg00318947,cg19999161,cg16748008,cg09469665,cg03650946,cg21134232,cg10794257,cg00899400,cg08164294	HOXA3	5'UTR	Island=6,N_Shore=11,S_Shore=1	GO:0001525,angiogenesis|GO:0001974,blood vessel remodeling|GO:0006351,transcription, DNA-templated|GO:0006355,regulation of transcription, DNA-templated|GO:0008284,positive regulation of cell proliferation|GO:0009952,anterior/posterior pattern specification|GO:0010159,specification of animal organ position|GO:0021615,glossopharyngeal nerve morphogenesis|GO:0030878,thyroid gland development|GO:004…	GO:0003700,DNA binding transcription factor activity|GO:0005515,protein binding|GO:0043565,sequence-specific DNA binding|GO:0071837,HMG box domain binding	GO:0005654,nucleoplasm		0.523528	0.614099	0.600006	0.565134	0.541491	0.791688	0.782707	0.783389	0.733972	0.716202	0.493852	1.00247	0.724644	8.60593e-06	0.000387869	0.00348722
DMR_98	2	119607097	119608121	1024	9	cg03726556,cg18093372,cg09385093,cg12305200,cg12418535,cg17030233,cg25317460,cg14228146,cg22548438	,EN1	TSS1500	Island=6,N_Shore=2,S_Shore=1	,GO:0000122,negative regulation of transcription from RNA polymerase II promoter|GO:0001501,skeletal system development|GO:0008344,adult locomotory behavior|GO:0009653,anatomical structure morphogenesis|GO:0009953,dorsal/ventral pattern formation|GO:0009954,proximal/distal pattern formation|GO:0021549,cerebellum development|GO:0030901,midbrain development|GO:0030917,midbrain-hindbrain boundary de…	,GO:0000978,RNA polymerase II proximal promoter sequence-specific DNA binding|GO:0001078,transcriptional repressor activity, RNA polymerase II proximal promoter sequence-specific DNA binding	,GO:0005634,nucleus		0.268703	0.422191	0.343137	0.259171	0.317804	0.108089	0.140721	0.0962995	0.166199	0.127293	1.94104	3.43582	2.58352	8.60593e-06	0.000387869	0.00348722
DMR_99	11	76380921	76381236	315	8	cg05076755,cg07202214,cg13633560,cg01048195,cg20533899,cg10788371,cg01439670,cg13985437	LRRC32	5'UTR	N_Shore=8	GO:0010628,positive regulation of gene expression|GO:0046007,negative regulation of activated T cell proliferation|GO:0050710,negative regulation of cytokine secretion	GO:0005515,protein binding	GO:0005887,integral component of plasma membrane		0.28355	0.378442	0.357502	0.364388	0.471364	0.147278	0.149479	0.0959561	0.18052	0.263426	1.27932	4.15277	2.40132	8.60593e-06	0.000387869	0.00348722
DMR_100	17	73893424	73893663	239	4	cg26965547,cg26780705,cg05970487,cg15238200	TRIM65	TSS1500	Island=2,S_Shore=2	GO:0010508,positive regulation of autophagy	GO:0008270,zinc ion binding	GO:0005634,nucleus|GO:0005654,nucleoplasm|GO:0005829,cytosol		0.0877279	0.0465696	0.108676	0.0551344	0.0781835	0.223369	0.223228	0.145277	0.348053	0.342261	0.221572	0.452226	0.294698	8.60593e-06	0.000387869	0.00348722
DMR_101	2	54086854	54087741	887	14	cg01876338,cg19592277,cg12451530,cg00701946,cg10124812,cg19878627,cg19961545,cg13356253,cg08611810,cg05414908,cg25102471,cg11939825,cg19664945,cg20081082	GPR75,LOC100302652	TSS1500	Island=9,S_Shore=5	GO:0007186,G-protein coupled receptor signaling pathway|GO:0070098,chemokine-mediated signaling pathway|GO:1901214,regulation of neuron death,	GO:0004930,G-protein coupled receptor activity|GO:0016493,C-C chemokine receptor activity,	GO:0005887,integral component of plasma membrane,		0.257869	0.185493	0.289422	0.203182	0.236869	0.424196	0.43774	0.396136	0.512908	0.517597	0.197818	0.692288	0.48247	1.72119e-05	0.000651881	0.00586087
DMR_102	6	29648161	29649084	923	20	cg08041448,cg24100841,cg19636627,cg20228636,cg08022281,cg03198009,cg12644888,cg00588198,cg10648573,cg04071440,cg03449857,cg13835168,cg16885113,cg11747594,cg15570656,cg11383134,cg15708526,cg22494932,cg25699073,cg25978138		IGR	opensea=20					0.744373	0.592106	0.600977	0.781403	0.713954	0.583494	0.55379	0.60922	0.378426	0.52131	1.04679	2.03015	1.35236	1.72119e-05	0.000651881	0.00586087
DMR_103	20	57582706	57583709	1003	20	cg20278790,cg18563860,cg00539174,cg12787553,cg07464217,cg02744249,cg18245281,cg06942450,cg17928895,cg23907860,cg04917472,cg06125903,cg22145559,cg17398227,cg13795831,cg08545593,cg01623438,cg09315134,cg21331324,cg12831034	CTSZ	TSS1500	S_Shore=20	GO:0002003,angiotensin maturation|GO:0006508,proteolysis|GO:0006888,ER to Golgi vesicle-mediated transport|GO:0010757,negative regulation of plasminogen activation|GO:0010977,negative regulation of neuron projection development|GO:0032091,negative regulation of protein binding|GO:0043312,neutrophil degranulation|GO:0043525,positive regulation of neuron apoptotic process|GO:0048208,COPII vesicle c…	GO:0004180,carboxypeptidase activity|GO:0004197,cysteine-type endopeptidase activity|GO:0005515,protein binding|GO:0008234,cysteine-type peptidase activity	GO:0000139,Golgi membrane|GO:0005576,extracellular region|GO:0005615,extracellular space|GO:0005764,lysosome|GO:0005783,endoplasmic reticulum|GO:0005788,endoplasmic reticulum lumen|GO:0005886,plasma membrane|GO:0009986,cell surface|GO:0030134,COPII-coated ER to Golgi transport vesicle|GO:0030426,growth cone|GO:0031410,cytoplasmic vesicle|GO:0033116,endoplasmic reticulum-Golgi intermediate compart…	hsa04142 Lysosome - Homo sapiens (human)|hsa04210 Apoptosis - Homo sapiens (human)	0.852425	0.875721	0.837507	0.874822	0.871968	0.794429	0.750941	0.820765	0.745946	0.739087	1.04596	1.29598	1.12136	1.72119e-05	0.000651881	0.00586087
DMR_104	11	69454423	69455530	1107	18	cg13271751,cg26399164,cg15233880,cg24387864,cg19209049,cg01406280,cg11190277,cg07781399,cg13720316,cg03735308,cg24203315,cg03364015,cg07149785,cg00858899,cg07663571,cg09551996,cg15330584,cg14513281	CCND1	TSS1500	Island=18	GO:0000082,G1/S transition of mitotic cell cycle|GO:0000082,G1/S transition of mitotic cell cycle|GO:0000122,negative regulation of transcription from RNA polymerase II promoter|GO:0000320,re-entry into mitotic cell cycle|GO:0001934,positive regulation of protein phosphorylation|GO:0006367,transcription initiation from RNA polymerase II promoter|GO:0006468,protein phosphorylation|GO:0006974,cellu…	GO:0003714,transcription corepressor activity|GO:0004693,cyclin-dependent protein serine/threonine kinase activity|GO:0005515,protein binding|GO:0008134,transcription factor binding|GO:0016538,cyclin-dependent protein serine/threonine kinase regulator activity|GO:0019899,enzyme binding|GO:0019901,protein kinase binding|GO:0032403,protein complex binding|GO:0042826,histone deacetylase binding|GO:0…	GO:0000307,cyclin-dependent protein kinase holoenzyme complex|GO:0005622,intracellular|GO:0005634,nucleus|GO:0005654,nucleoplasm|GO:0005654,nucleoplasm|GO:0005829,cytosol|GO:0005923,bicellular tight junction|GO:0016020,membrane|GO:0017053,transcriptional repressor complex	hsa01522 Endocrine resistance - Homo sapiens (human)|hsa04068 FoxO signaling pathway - Homo sapiens (human)|hsa04110 Cell cycle - Homo sapiens (human)|hsa04115 p53 signaling pathway - Homo sapiens (human)|hsa04151 PI3K-Akt signaling pathway - Homo sapiens (human)|hsa04152 AMPK signaling pathway - Homo sapiens (human)|hsa04310 Wnt signaling pathway - Homo sapiens (human)|hsa04340 Hedgehog signalin…	0.102984	0.138555	0.128093	0.136005	0.187109	0.0690119	0.0582157	0.0489452	0.0744127	0.0934353	1.01454	3.58566	2.10391	1.72119e-05	0.000651881	0.00586087
DMR_105	6	33047944	33048879	935	18	cg13349035,cg10850215,cg25511667,cg00570906,cg13581859,cg17588455,cg09234582,cg25045942,cg19053046,cg15829535,cg19990651,cg02197634,cg09059466,cg01132696,cg14801692,cg17362900,cg25491704,cg02692313	HLA-DPB1	Body	Island=10,N_Shore=6,S_Shore=2	GO:0019886,antigen processing and presentation of exogenous peptide antigen via MHC class II|GO:0019886,antigen processing and presentation of exogenous peptide antigen via MHC class II|GO:0031295,T cell costimulation|GO:0032729,positive regulation of interferon-gamma production|GO:0042102,positive regulation of T cell proliferation|GO:0050852,T cell receptor signaling pathway|GO:0050870,positive…	GO:0042605,peptide antigen binding	GO:0000139,Golgi membrane|GO:0005765,lysosomal membrane|GO:0005886,plasma membrane|GO:0009986,cell surface|GO:0010008,endosome membrane|GO:0012507,ER to Golgi transport vesicle membrane|GO:0016020,membrane|GO:0030658,transport vesicle membrane|GO:0030666,endocytic vesicle membrane|GO:0030669,clathrin-coated endocytic vesicle membrane|GO:0032588,trans-Golgi network membrane|GO:0042613,MHC class II…	hsa04145 Phagosome - Homo sapiens (human)|hsa04514 Cell adhesion molecules (CAMs) - Homo sapiens (human)|hsa04612 Antigen processing and presentation - Homo sapiens (human)|hsa04640 Hematopoietic cell lineage - Homo sapiens (human)|hsa04658 Th1 and Th2 cell differentiation - Homo sapiens (human)|hsa04659 Th17 cell differentiation - Homo sapiens (human)|hsa04672 Intestinal immune network for IgA p…	0.151791	0.109056	0.160329	0.123913	0.136026	0.164403	0.239901	0.151058	0.292809	0.345288	0.270255	0.94736	0.522597	1.72119e-05	0.000651881	0.00586087
DMR_106	5	172198714	172199667	953	19	cg23002268,cg23162310,cg10837843,cg09799633,cg06819445,cg25108022,cg18121420,cg22473727,cg04525476,cg04060275,cg16957313,cg10672508,cg09493150,cg05612977,cg15414042,cg02352687,cg19537645,cg12884779,cg12333707	DUSP1	TSS1500	Island=17,S_Shore=2	GO:0000188,inactivation of MAPK activity|GO:0001706,endoderm formation|GO:0006979,response to oxidative stress|GO:0009416,response to light stimulus|GO:0032355,response to estradiol|GO:0032526,response to retinoic acid|GO:0032870,cellular response to hormone stimulus|GO:0033574,response to testosterone|GO:0035335,peptidyl-tyrosine dephosphorylation|GO:0035556,intracellular signal transduction|GO:…	GO:0004726,non-membrane spanning protein tyrosine phosphatase activity|GO:0005515,protein binding|GO:0008138,protein tyrosine/serine/threonine phosphatase activity|GO:0008330,protein tyrosine/threonine phosphatase activity|GO:0017017,MAP kinase tyrosine/serine/threonine phosphatase activity|GO:0019838,growth factor binding	GO:0005634,nucleus|GO:0005737,cytoplasm	hsa04010 MAPK signaling pathway - Homo sapiens (human)|hsa04726 Serotonergic synapse - Homo sapiens (human)|hsa05418 Fluid shear stress and atherosclerosis - Homo sapiens (human)	0.10576	0.144096	0.115667	0.133341	0.179965	0.0863538	0.068744	0.0675407	0.0817295	0.090163	0.468408	4.02983	2.01928	1.72119e-05	0.000651881	0.00586087
DMR_107	4	154710900	154711906	1006	19	cg20727217,cg24241928,cg13357229,cg14435644,cg09788843,cg01821854,cg00705808,cg13732865,cg05241277,cg24968721,cg07999845,cg23910835,cg01298731,cg21630608,cg04959480,cg00096536,cg04357584,cg10790791,cg10663078	SFRP2,	TSS1500	N_Shore=19	GO:0001569,branching involved in blood vessel morphogenesis|GO:0002063,chondrocyte development|GO:0003151,outflow tract morphogenesis|GO:0003214,cardiac left ventricle morphogenesis|GO:0006915,apoptotic process|GO:0007186,G-protein coupled receptor signaling pathway|GO:0007267,cell-cell signaling|GO:0007584,response to nutrient|GO:0008284,positive regulation of cell proliferation|GO:0008285,negat…	GO:0001968,fibronectin binding|GO:0004930,G-protein coupled receptor activity|GO:0005178,integrin binding|GO:0017147,Wnt-protein binding|GO:0017147,Wnt-protein binding|GO:0042813,Wnt-activated receptor activity|GO:0048018,receptor ligand activity|GO:0061133,endopeptidase activator activity,	GO:0005615,extracellular space|GO:0005615,extracellular space|GO:0016021,integral component of membrane|GO:0031012,extracellular matrix,	hsa04310 Wnt signaling pathway - Homo sapiens (human),	0.630978	0.687202	0.663127	0.577354	0.65381	0.494859	0.492008	0.538561	0.508257	0.500674	1.02912	2.95082	1.57145	1.72119e-05	0.000651881	0.00586087
DMR_108	17	46651722	46652550	828	11	cg13975855,cg02836478,cg24767968,cg04117801,cg24761525,cg11060532,cg13293524,cg12910797,cg13280788,cg13114095,cg00842549	HOXB3	TSS1500	N_Shelf=6,N_Shore=5	GO:0000122,negative regulation of transcription from RNA polymerase II promoter|GO:0001525,angiogenesis|GO:0002244,hematopoietic progenitor cell differentiation|GO:0006366,transcription from RNA polymerase II promoter|GO:0009952,anterior/posterior pattern specification|GO:0021546,rhombomere development|GO:0021615,glossopharyngeal nerve morphogenesis|GO:0030878,thyroid gland development|GO:0045944…	GO:0000978,RNA polymerase II proximal promoter sequence-specific DNA binding|GO:0000979,RNA polymerase II core promoter sequence-specific DNA binding|GO:0001077,transcriptional activator activity, RNA polymerase II proximal promoter sequence-specific DNA binding	GO:0005634,nucleus		0.125986	0.123976	0.176842	0.107928	0.134949	0.273779	0.318889	0.259526	0.305175	0.35895	0.265103	0.643721	0.421693	1.72119e-05	0.000651881	0.00586087
DMR_109	1	203320190	203320732	542	10	cg04704856,cg11914824,cg22705746,cg16289210,cg27387030,cg26987645,cg03764585,cg11897689,cg21089380,cg01739509	FMOD	TSS1500	opensea=10	GO:0007181,transforming growth factor beta receptor complex assembly|GO:0007409,axonogenesis|GO:0018146,keratan sulfate biosynthetic process|GO:0030199,collagen fibril organization|GO:0042340,keratan sulfate catabolic process		GO:0005576,extracellular region|GO:0005576,extracellular region|GO:0005578,proteinaceous extracellular matrix|GO:0005615,extracellular space|GO:0005796,Golgi lumen|GO:0031012,extracellular matrix|GO:0031012,extracellular matrix|GO:0043202,lysosomal lumen		0.0224422	0.0207007	0.0362867	0.0235027	0.0324264	0.0741715	0.0719267	0.0317537	0.134245	0.118235	0.174293	0.410282	0.303523	1.72119e-05	0.000651881	0.00586087
DMR_110	2	27301057	27301943	886	10	cg14021880,cg19399165,cg03514843,cg20516209,cg02804722,cg05029532,cg15895197,cg05654832,cg19815863,cg22047282	EMILIN1	TSS1500	N_Shelf=7,opensea=3	GO:0007155,cell adhesion|GO:0007160,cell-matrix adhesion|GO:0016477,cell migration|GO:0070207,protein homotrimerization	GO:0005515,protein binding|GO:0030023,extracellular matrix constituent conferring elasticity|GO:0042802,identical protein binding|GO:0042802,identical protein binding|GO:0098640,integrin binding involved in cell-matrix adhesion	GO:0005576,extracellular region|GO:0005578,proteinaceous extracellular matrix|GO:0005581,collagen trimer|GO:0005615,extracellular space|GO:0031012,extracellular matrix|GO:0031012,extracellular matrix|GO:0031012,extracellular matrix|GO:0034668,integrin alpha4-beta1 complex|GO:0070062,extracellular exosome|GO:1990971,EMILIN complex		0.061579	0.044891	0.0882708	0.0478129	0.0759458	0.182805	0.17067	0.0937594	0.256305	0.245817	0.243306	0.436836	0.337826	1.72119e-05	0.000651881	0.00586087
DMR_111	1	173176090	173176731	641	8	cg26811088,cg18459392,cg21439763,cg23038529,cg26315984,cg10861599,cg22034554,cg16517394	TNFSF4	TSS1500	opensea=8	GO:0002215,defense response to nematode|GO:0002526,acute inflammatory response|GO:0002726,positive regulation of T cell cytokine production|GO:0002819,regulation of adaptive immune response|GO:0002830,positive regulation of type 2 immune response|GO:0002891,positive regulation of immunoglobulin mediated immune response|GO:0006955,immune response|GO:0007165,signal transduction|GO:0008203,cholester…	GO:0005102,receptor binding|GO:0005125,cytokine activity|GO:0005164,tumor necrosis factor receptor binding|GO:0005515,protein binding|GO:0032813,tumor necrosis factor receptor superfamily binding|GO:0032813,tumor necrosis factor receptor superfamily binding	GO:0005615,extracellular space|GO:0005886,plasma membrane|GO:0005887,integral component of plasma membrane|GO:0009986,cell surface	hsa04060 Cytokine-cytokine receptor interaction - Homo sapiens (human)	0.635817	0.660631	0.635908	0.637667	0.616623	0.332969	0.388932	0.324779	0.382239	0.357106	1.46066	2.11645	1.79033	1.72119e-05	0.000651881	0.00586087
DMR_112	12	109896676	109897566	890	7	cg23877008,cg07646813,cg21517720,cg24622829,cg23560891,cg23629149,cg14123303	KCTD10	Body	opensea=7	GO:0006511,ubiquitin-dependent protein catabolic process|GO:0016567,protein ubiquitination|GO:0016567,protein ubiquitination|GO:0043161,proteasome-mediated ubiquitin-dependent protein catabolic process|GO:0051260,protein homooligomerization	GO:0004842,ubiquitin-protein transferase activity|GO:0005112,Notch binding|GO:0005515,protein binding	GO:0005654,nucleoplasm|GO:0005829,cytosol|GO:0031463,Cul3-RING ubiquitin ligase complex		0.727327	0.750448	0.765387	0.764837	0.793585	0.637931	0.623982	0.566234	0.686936	0.730794	0.609996	1.97916	1.20806	1.72119e-05	0.000651881	0.00586087
DMR_113	1	202091865	202092005	140	7	cg15096829,cg27313021,cg17219660,cg02124912,cg13300939,cg08129759,cg02848961	GPR37L1	TSS200	opensea=7	GO:0007193,adenylate cyclase-inhibiting G-protein coupled receptor signaling pathway|GO:0021940,positive regulation of cerebellar granule cell precursor proliferation|GO:0043410,positive regulation of MAPK cascade|GO:0045665,negative regulation of neuron differentiation|GO:0045879,negative regulation of smoothened signaling pathway|GO:0048712,negative regulation of astrocyte differentiation|GO:19…	GO:0005515,protein binding|GO:0008528,G-protein coupled peptide receptor activity|GO:0036505,prosaposin receptor activity|GO:0042277,peptide binding	GO:0005886,plasma membrane|GO:0016021,integral component of membrane|GO:0043235,receptor complex		0.0739499	0.0488399	0.102565	0.0588149	0.0819923	0.165921	0.18115	0.104862	0.256171	0.278832	0.283991	0.541237	0.365107	1.72119e-05	0.000651881	0.00586087
DMR_114	6	42110496	42110867	371	5	cg18486258,cg16669650,cg02134976,cg02382532,cg15679527	C6orf132	TSS200	S_Shore=5					0.237953	0.269896	0.253391	0.285299	0.356287	0.0826427	0.0826535	0.0640577	0.116169	0.161889	1.15076	4.24299	2.6594	1.72119e-05	0.000651881	0.00586087
DMR_115	7	640338	641028	690	5	cg06413196,cg00795927,cg10623530,cg01462184,cg26669717	PRKAR1B	Body	N_Shelf=5	GO:0003091,renal water homeostasis|GO:0006468,protein phosphorylation|GO:0007596,blood coagulation|GO:0007611,learning or memory|GO:0034199,activation of protein kinase A activity|GO:0071377,cellular response to glucagon stimulus|GO:2000480,negative regulation of cAMP-dependent protein kinase activity	GO:0004862,cAMP-dependent protein kinase inhibitor activity|GO:0005515,protein binding|GO:0008603,cAMP-dependent protein kinase regulator activity|GO:0008603,cAMP-dependent protein kinase regulator activity|GO:0030552,cAMP binding|GO:0034236,protein kinase A catalytic subunit binding	GO:0005829,cytosol|GO:0005886,plasma membrane|GO:0005952,cAMP-dependent protein kinase complex|GO:0097546,ciliary base	hsa04910 Insulin signaling pathway - Homo sapiens (human)	0.105216	0.0587672	0.116644	0.0936783	0.0970694	0.244099	0.271416	0.165171	0.335215	0.336518	0.251429	0.62153	0.359811	1.72119e-05	0.000651881	0.00586087
DMR_116	17	4802266	4802735	469	5	cg09826019,cg03652711,cg25900551,cg05529816,cg12608565	C17orf107,CHRNE	TSS1500	Island=5	,GO:0006810,transport|GO:0006936,muscle contraction|GO:0007165,signal transduction|GO:0007271,synaptic transmission, cholinergic|GO:0007274,neuromuscular synaptic transmission|GO:0035094,response to nicotine|GO:0060079,excitatory postsynaptic potential|GO:0098655,cation transmembrane transport	,GO:0008324,cation transmembrane transporter activity|GO:0015276,ligand-gated ion channel activity|GO:0015464,acetylcholine receptor activity|GO:0022848,acetylcholine-gated cation-selective channel activity|GO:0042166,acetylcholine binding	,GO:0005886,plasma membrane|GO:0005887,integral component of plasma membrane|GO:0005892,acetylcholine-gated channel complex|GO:0030054,cell junction|GO:0045211,postsynaptic membrane	,hsa04080 Neuroactive ligand-receptor interaction - Homo sapiens (human)	0.198757	0.0580289	0.0534753	0.0748009	0.0489976	0.165715	0.0963676	0.253438	0.253358	0.186234	0.325824	1.20288	0.647571	1.72119e-05	0.000651881	0.00586087
DMR_117	2	6790845	6791105	260	4	cg06647133,cg22601570,cg00164078,cg04969551	MIR7515HG	TSS1500	opensea=4					0.188883	0.156528	0.228949	0.191093	0.242273	0.426114	0.355213	0.350166	0.408157	0.461216	0.199221	0.720276	0.429759	1.72119e-05	0.000651881	0.00586087
DMR_118	10	135123006	135123421	415	4	cg12275410,cg16284674,cg24424217,cg07908874	ZNF511	Body	Island=4	GO:0006351,transcription, DNA-templated|GO:0006355,regulation of transcription, DNA-templated	GO:0003677,DNA binding|GO:0005515,protein binding|GO:0046872,metal ion binding	GO:0005634,nucleus		0.648878	0.58139	0.642957	0.633551	0.663399	0.863339	0.804486	0.863689	0.871657	0.855186	0.490516	0.962297	0.730835	1.72119e-05	0.000651881	0.00586087
DMR_119	14	95047880	95048198	318	4	cg16937611,cg18397517,cg25869005,cg08764227	SERPINA5	5'UTR	opensea=4	GO:0006869,lipid transport|GO:0007283,spermatogenesis|GO:0007342,fusion of sperm to egg plasma membrane involved in single fertilization|GO:0007596,blood coagulation|GO:0010951,negative regulation of endopeptidase activity|GO:0051346,negative regulation of hydrolase activity|GO:0061107,seminal vesicle development	GO:0001972,retinoic acid binding|GO:0002020,protease binding|GO:0004867,serine-type endopeptidase inhibitor activity|GO:0005515,protein binding|GO:0005539,glycosaminoglycan binding|GO:0008201,heparin binding|GO:0031210,phosphatidylcholine binding|GO:0032190,acrosin binding	GO:0002080,acrosomal membrane|GO:0005576,extracellular region|GO:0005576,extracellular region|GO:0005615,extracellular space|GO:0009897,external side of plasma membrane|GO:0016020,membrane|GO:0031091,platelet alpha granule|GO:0031094,platelet dense tubular network|GO:0036024,protein C inhibitor-TMPRSS7 complex|GO:0036025,protein C inhibitor-TMPRSS11E complex|GO:0036026,protein C inhibitor-PLAT co…	hsa04610 Complement and coagulation cascades - Homo sapiens (human)	0.152257	0.120423	0.253571	0.149317	0.260529	0.320184	0.24549	0.188166	0.304218	0.412385	0.320615	1.0188	0.554683	1.72119e-05	0.000651881	0.00586087
DMR_120	17	79304188	79304801	613	14	cg24093545,cg03841376,cg22532155,cg11758345,cg15913671,cg19749167,cg09695261,cg21591452,cg24586045,cg21735384,cg25555068,cg09458554,cg23514211,cg19726658	TMEM105	TSS1500	opensea=14			GO:0016021,integral component of membrane		0.384554	0.316331	0.405855	0.364867	0.415627	0.671089	0.566415	0.608752	0.621228	0.603626	0.471942	0.73922	0.598502	2.58178e-05	0.000909068	0.00817317
DMR_121	14	21491469	21492736	1267	12	cg18020268,cg19576080,cg09335599,cg04594986,cg15703728,cg07589927,cg15094224,cg23288563,cg10336220,cg23552977,cg21994794,cg05624244	NDRG2	5'UTR	Island=1,N_Shore=11	GO:0001818,negative regulation of cytokine production|GO:0007165,signal transduction|GO:0010574,regulation of vascular endothelial growth factor production|GO:0016055,Wnt signaling pathway|GO:0021762,substantia nigra development|GO:0030154,cell differentiation|GO:0048662,negative regulation of smooth muscle cell proliferation|GO:0070373,negative regulation of ERK1 and ERK2 cascade|GO:0090361,regu…	GO:0003674,molecular_function|GO:0005515,protein binding	GO:0005634,nucleus|GO:0005737,cytoplasm|GO:0005794,Golgi apparatus|GO:0005829,cytosol|GO:0030426,growth cone|GO:0048471,perinuclear region of cytoplasm|GO:0070062,extracellular exosome		0.20374	0.143641	0.229999	0.174977	0.20484	0.449443	0.371826	0.407322	0.387879	0.401486	0.277183	0.641409	0.453962	3.44237e-05	0.00114079	0.0102565
DMR_122	12	89744471	89745192	721	12	cg17740822,cg07239716,cg10233654,cg05769889,cg00772407,cg01242903,cg25124406,cg01814191,cg17584323,cg04152581,cg20521715,cg20894341	DUSP6	Body	Island=1,N_Shore=11	GO:0000165,MAPK cascade|GO:0000187,activation of MAPK activity|GO:0000188,inactivation of MAPK activity|GO:0009953,dorsal/ventral pattern formation|GO:0014070,response to organic cyclic compound|GO:0030154,cell differentiation|GO:0035335,peptidyl-tyrosine dephosphorylation|GO:0040036,regulation of fibroblast growth factor receptor signaling pathway|GO:0042493,response to drug|GO:0042663,regulatio…	GO:0004725,protein tyrosine phosphatase activity|GO:0008138,protein tyrosine/serine/threonine phosphatase activity|GO:0017017,MAP kinase tyrosine/serine/threonine phosphatase activity	GO:0005654,nucleoplasm|GO:0005737,cytoplasm|GO:0005829,cytosol	hsa04010 MAPK signaling pathway - Homo sapiens (human)|hsa05202 Transcriptional misregulation in cancer - Homo sapiens (human)	0.162623	0.246511	0.195868	0.211939	0.248064	0.0760586	0.0673161	0.0569493	0.0953598	0.0962122	1.04944	3.88581	2.58708	4.30296e-05	0.00131928	0.0118613
DMR_123	3	182817190	182817626	436	12	cg00161968,cg07464924,cg05496383,cg23166970,cg03318940,cg22801868,cg00890010,cg22211233,cg04991337,cg02616966,cg08395365,cg03344955	MCCC1	TSS1500	Island=8,S_Shore=4	GO:0006552,leucine catabolic process|GO:0006552,leucine catabolic process|GO:0006552,leucine catabolic process|GO:0006768,biotin metabolic process|GO:0006768,biotin metabolic process|GO:0009083,branched-chain amino acid catabolic process|GO:0051291,protein heterooligomerization	GO:0004075,biotin carboxylase activity|GO:0004485,methylcrotonoyl-CoA carboxylase activity|GO:0004485,methylcrotonoyl-CoA carboxylase activity|GO:0005515,protein binding|GO:0005524,ATP binding|GO:0009374,biotin binding|GO:0046872,metal ion binding	GO:0002169,3-methylcrotonyl-CoA carboxylase complex, mitochondrial|GO:0002169,3-methylcrotonyl-CoA carboxylase complex, mitochondrial|GO:0005739,mitochondrion|GO:0005743,mitochondrial inner membrane|GO:0005759,mitochondrial matrix|GO:0005759,mitochondrial matrix|GO:0005759,mitochondrial matrix|GO:0005829,cytosol|GO:1905202,methylcrotonoyl-CoA carboxylase complex	hsa00280 Valine, leucine and isoleucine degradation - Homo sapiens (human)|hsa01100 Metabolic pathways - Homo sapiens (human)	0.0381061	0.0457876	0.0553321	0.0738868	0.0785432	0.0273081	0.0169263	0.0145049	0.019974	0.022339	1.38561	5.3394	3.22394	4.30296e-05	0.00131928	0.0118613
DMR_124	2	102091195	102092013	818	11	cg27510024,cg10462143,cg02933362,cg25763898,cg27255239,cg12291728,cg02561771,cg05729200,cg01388757,cg04415270,cg26011364	RFX8	TSS1500	S_Shore=11	GO:0006351,transcription, DNA-templated|GO:0006357,regulation of transcription from RNA polymerase II promoter	GO:0000978,RNA polymerase II proximal promoter sequence-specific DNA binding|GO:0003700,DNA binding transcription factor activity	GO:0005634,nucleus		0.213535	0.245815	0.217453	0.253064	0.290124	0.0929298	0.0866352	0.0669841	0.144013	0.141371	1.00592	14.0121	3.39103	4.30296e-05	0.00131928	0.0118613
DMR_125	1	15271760	15272567	807	11	cg20639325,cg26577320,cg17055661,cg00682038,cg11648522,cg24289966,cg16663033,cg14258148,cg21413173,cg03398002,cg00577560	KAZN,KIAA1026	TSS1500	opensea=11	GO:0070268,cornification,	GO:0005515,protein binding,	GO:0001533,cornified envelope|GO:0005654,nucleoplasm|GO:0005829,cytosol|GO:0005829,cytosol|GO:0005856,cytoskeleton|GO:0016607,nuclear speck|GO:0030057,desmosome,		0.136374	0.136598	0.164204	0.133125	0.171538	0.227192	0.225222	0.175313	0.286269	0.334168	0.198376	1.16928	0.470765	4.30296e-05	0.00131928	0.0118613
DMR_126	17	6658500	6659562	1062	11	cg08940637,cg09251764,cg17753212,cg23571857,cg05513208,cg06085204,cg26502852,cg20803910,cg27146152,cg03419151,cg06195280	XAF1	TSS1500	opensea=11	GO:0006915,apoptotic process|GO:0031333,negative regulation of protein complex assembly|GO:0035456,response to interferon-beta|GO:0060337,type I interferon signaling pathway	GO:0008270,zinc ion binding	GO:0005634,nucleus|GO:0005739,mitochondrion|GO:0005829,cytosol		0.306112	0.209654	0.257276	0.236199	0.271109	0.148182	0.168354	0.146289	0.158182	0.186579	1.12532	5.9197	2.63289	4.30296e-05	0.00131928	0.0118613
DMR_127	6	35265308	35265759	451	11	cg08207604,cg02927327,cg05583848,cg02919168,cg27321913,cg14960043,cg03355690,cg00237391,cg07294541,cg13425174,cg10418263	DEF6	TSS1500	opensea=11		GO:0005515,protein binding	GO:0005654,nucleoplasm|GO:0005829,cytosol|GO:0005856,cytoskeleton|GO:0005886,plasma membrane|GO:0016020,membrane|GO:0030175,filopodium|GO:0048471,perinuclear region of cytoplasm		0.0895799	0.0695338	0.0798954	0.0927063	0.10282	0.258649	0.163453	0.218905	0.215303	0.170631	0.318238	0.650527	0.426227	4.30296e-05	0.00131928	0.0118613
DMR_128	1	161008127	161008920	793	10	cg18147168,cg13466383,cg00329300,cg11731300,cg24411043,cg12426196,cg24161057,cg11578532,cg00446235,cg13906823	TSTD1	TSS200	Island=7,N_Shore=2,S_Shore=1	GO:0070221,sulfide oxidation, using sulfide:quinone oxidoreductase	GO:0050337,thiosulfate-thiol sulfurtransferase activity	GO:0005737,cytoplasm|GO:0005739,mitochondrion|GO:0005829,cytosol|GO:0005829,cytosol|GO:0036464,cytoplasmic ribonucleoprotein granule|GO:0048471,perinuclear region of cytoplasm		0.183239	0.169908	0.152723	0.228425	0.209174	0.481736	0.333938	0.472043	0.367521	0.322949	0.34264	0.707204	0.449438	4.30296e-05	0.00131928	0.0118613
DMR_129	1	3191219	3191883	664	9	cg19263228,cg20988960,cg00894041,cg02132535,cg26520908,cg17601209,cg12141662,cg03449456,cg00329272	PRDM16	Body	N_Shelf=7,opensea=2	GO:0000122,negative regulation of transcription from RNA polymerase II promoter|GO:0006351,transcription, DNA-templated|GO:0022008,neurogenesis|GO:0030512,negative regulation of transforming growth factor beta receptor signaling pathway|GO:0030512,negative regulation of transforming growth factor beta receptor signaling pathway|GO:0034968,histone lysine methylation|GO:0035019,somatic stem cell po…	GO:0003713,transcription coactivator activity|GO:0005515,protein binding|GO:0018024,histone-lysine N-methyltransferase activity|GO:0033613,activating transcription factor binding|GO:0043565,sequence-specific DNA binding|GO:0046332,SMAD binding|GO:0046872,metal ion binding	GO:0005634,nucleus|GO:0005654,nucleoplasm|GO:0005829,cytosol|GO:0005829,cytosol|GO:0016235,aggresome|GO:0017053,transcriptional repressor complex		0.641697	0.475871	0.602625	0.496433	0.519764	0.786722	0.708536	0.827698	0.821031	0.755651	0.403508	0.949157	0.676011	2.58178e-05	0.000909068	0.00817317
DMR_130	17	19976149	19977156	1007	8	cg01289959,cg21302651,cg23614811,cg08463297,cg07330288,cg23764603,cg22999025,cg14273485	SPECC1,	5'UTR	opensea=8			GO:0005634,nucleus|GO:0016020,membrane,		0.524459	0.555021	0.538871	0.566802	0.624296	0.435377	0.405982	0.38754	0.420546	0.427094	1.03184	3.38245	2.15688	2.58178e-05	0.000909068	0.00817317
DMR_131	11	111789132	111789693	561	7	cg23921031,cg17794604,cg11845417,cg08775230,cg10475564,cg05697249,cg19053142	C11orf52	TSS1500	opensea=7			GO:0070062,extracellular exosome		0.235577	0.213163	0.257758	0.2222	0.281284	0.387339	0.347385	0.398334	0.39488	0.514097	0.309206	0.996667	0.493319	2.58178e-05	0.000909068	0.00817317
DMR_132	16	28550171	28550619	448	7	cg25288194,cg15745560,cg06288570,cg05590982,cg01803679,cg15149645,cg04492847	NUPR1	TSS200	opensea=7	GO:0002526,acute inflammatory response|GO:0006351,transcription, DNA-templated|GO:0006357,regulation of transcription from RNA polymerase II promoter|GO:0006461,protein complex assembly|GO:0006473,protein acetylation|GO:0008584,male gonad development|GO:0009636,response to toxic substance|GO:0016049,cell growth|GO:0031401,positive regulation of protein modification process|GO:0035914,skeletal mus…	GO:0003677,DNA binding|GO:0003682,chromatin binding|GO:0005515,protein binding	GO:0005634,nucleus|GO:0005829,cytosol|GO:0032993,protein-DNA complex	hsa05202 Transcriptional misregulation in cancer - Homo sapiens (human)	0.0610133	0.0361212	0.0748974	0.0394888	0.0582858	0.117447	0.117398	0.0839631	0.206508	0.210015	0.194054	0.572559	0.333731	2.58178e-05	0.000909068	0.00817317
DMR_133	1	86047239	86047911	672	5	cg13206932,cg22123915,cg18027683,cg11750851,cg17319576	CYR61	Body	Island=1,S_Shore=4	GO:0001558,regulation of cell growth|GO:0001649,osteoblast differentiation|GO:0001934,positive regulation of protein phosphorylation|GO:0002041,intussusceptive angiogenesis|GO:0003181,atrioventricular valve morphogenesis|GO:0003278,apoptotic process involved in heart morphogenesis|GO:0003281,ventricular septum development|GO:0006935,chemotaxis|GO:0007155,cell adhesion|GO:0007267,cell-cell signali…	GO:0005178,integrin binding|GO:0005520,insulin-like growth factor binding|GO:0008201,heparin binding|GO:0050840,extracellular matrix binding	GO:0005578,proteinaceous extracellular matrix|GO:0005615,extracellular space|GO:0005788,endoplasmic reticulum lumen|GO:0031012,extracellular matrix		0.0483135	0.0309388	0.0628332	0.0423009	0.0539788	0.13382	0.12139	0.0857647	0.200866	0.209232	0.236045	0.725783	0.373893	2.58178e-05	0.000909068	0.00817317
DMR_134	3	134093850	134094235	385	5	cg01365568,cg06309895,cg20217702,cg01400089,cg17650523	AMOTL2	TSS1500	S_Shore=5	GO:0016055,Wnt signaling pathway|GO:0035329,hippo signaling	GO:0005515,protein binding|GO:0042802,identical protein binding	GO:0005829,cytosol|GO:0005923,bicellular tight junction|GO:0016324,apical plasma membrane|GO:0055037,recycling endosome	hsa04530 Tight junction - Homo sapiens (human)	0.119054	0.10447	0.175961	0.129105	0.207465	0.38086	0.272363	0.300764	0.293005	0.349377	0.326894	0.751399	0.521556	2.58178e-05	0.000909068	0.00817317
DMR_135	6	47444224	47444894	670	4	cg23250715,cg12968598,cg03149641,cg02130027	CD2AP	TSS1500	N_Shore=4	GO:0006461,protein complex assembly|GO:0006930,substrate-dependent cell migration, cell extension|GO:0007015,actin filament organization|GO:0007049,cell cycle|GO:0007165,signal transduction|GO:0016050,vesicle organization|GO:0032911,negative regulation of transforming growth factor beta1 production|GO:0043161,proteasome-mediated ubiquitin-dependent protein catabolic process|GO:0048259,regulation …	GO:0005172,vascular endothelial growth factor receptor binding|GO:0005200,structural constituent of cytoskeleton|GO:0005515,protein binding|GO:0008013,beta-catenin binding|GO:0008022,protein C-terminus binding|GO:0017124,SH3 domain binding|GO:0032403,protein complex binding|GO:0045296,cadherin binding	GO:0001726,ruffle|GO:0005737,cytoplasm|GO:0005886,plasma membrane|GO:0005911,cell-cell junction|GO:0015629,actin cytoskeleton|GO:0030139,endocytic vesicle|GO:0031941,filamentous actin|GO:0048471,perinuclear region of cytoplasm|GO:0070062,extracellular exosome	hsa05100 Bacterial invasion of epithelial cells - Homo sapiens (human)	0.384819	0.34061	0.40408	0.363993	0.422711	0.610436	0.566347	0.558584	0.59902	0.577958	0.440829	0.771231	0.624858	2.58178e-05	0.000909068	0.00817317
DMR_136	2	206547615	206548171	556	4	cg13923688,cg24900980,cg01154445,cg06967443	NRP2	5'UTR	N_Shore=4	GO:0001525,angiogenesis|GO:0001938,positive regulation of endothelial cell proliferation|GO:0003148,outflow tract septum morphogenesis|GO:0007155,cell adhesion|GO:0007411,axon guidance|GO:0010595,positive regulation of endothelial cell migration|GO:0021675,nerve development|GO:0038084,vascular endothelial growth factor signaling pathway|GO:0048010,vascular endothelial growth factor receptor signa…	GO:0004872,receptor activity|GO:0005021,vascular endothelial growth factor-activated receptor activity|GO:0005515,protein binding|GO:0008201,heparin binding|GO:0017154,semaphorin receptor activity|GO:0019838,growth factor binding|GO:0019955,cytokine binding|GO:0046872,metal ion binding	GO:0002116,semaphorin receptor complex|GO:0005576,extracellular region|GO:0005886,plasma membrane|GO:0016020,membrane|GO:0016021,integral component of membrane		0.103849	0.179769	0.0836582	0.133026	0.132042	0.0322834	0.0302333	0.02102	0.0373015	0.0299007	1.49892	8.06213	4.28657	2.58178e-05	0.000909068	0.00817317
DMR_137	6	32049053	32049953	900	14	cg27442047,cg20116929,cg13064679,cg11289677,cg15048806,cg14218053,cg17295739,cg23994443,cg17031787,cg07306331,cg10303653,cg08753391,cg27624229,cg00661399	TNXB	Body	S_Shelf=13,S_Shore=1	GO:0007155,cell adhesion|GO:0030036,actin cytoskeleton organization|GO:0030199,collagen fibril organization|GO:0032963,collagen metabolic process|GO:0048251,elastic fiber assembly	GO:0005178,integrin binding|GO:0005515,protein binding|GO:0008201,heparin binding	GO:0005576,extracellular region|GO:0005578,proteinaceous extracellular matrix|GO:0005583,fibrillar collagen trimer|GO:0005615,extracellular space|GO:0005622,intracellular|GO:0031012,extracellular matrix|GO:0031012,extracellular matrix|GO:0031012,extracellular matrix|GO:0070062,extracellular exosome	hsa04151 PI3K-Akt signaling pathway - Homo sapiens (human)|hsa04510 Focal adhesion - Homo sapiens (human)|hsa04512 ECM-receptor interaction - Homo sapiens (human)|hsa05206 MicroRNAs in cancer - Homo sapiens (human)	0.164112	0.120798	0.174535	0.134587	0.149666	0.268343	0.267678	0.241287	0.327075	0.341493	0.178602	0.773926	0.430485	3.44237e-05	0.00114079	0.0102565
DMR_138	6	30884590	30885709	1119	14	cg27185298,cg17428922,cg15673491,cg05632020,cg03825488,cg09296730,cg18881094,cg05680196,cg24846030,cg19014295,cg16036022,cg19301017,cg19912283,cg21394121	VARS2	Body	S_Shelf=14	GO:0006438,valyl-tRNA aminoacylation|GO:0006450,regulation of translational fidelity	GO:0002161,aminoacyl-tRNA editing activity|GO:0004832,valine-tRNA ligase activity|GO:0005524,ATP binding|GO:0016874,ligase activity	GO:0005739,mitochondrion|GO:0005829,cytosol	hsa00970 Aminoacyl-tRNA biosynthesis - Homo sapiens (human)	0.53713	0.596981	0.559583	0.537486	0.529008	0.752899	0.746423	0.785969	0.761654	0.7476	0.51751	0.987733	0.710302	3.44237e-05	0.00114079	0.0102565
DMR_139	8	145018816	145019681	865	15	cg16783170,cg09406760,cg11956819,cg17960164,cg13984060,cg07690326,cg10451724,cg07898713,cg24120597,cg00128812,cg16434940,cg00611614,cg26373812,cg09235308,cg04018533	PLEC1	Body	Island=7,S_Shore=8					0.26998	0.196439	0.275666	0.227798	0.279814	0.39654	0.374813	0.323372	0.454901	0.473524	0.266355	0.983523	0.543151	3.44237e-05	0.00114079	0.0102565
DMR_140	11	117747636	117748512	876	15	cg03821689,cg09608949,cg15101392,cg10372188,cg20328588,cg20652899,cg09582200,cg05360242,cg10719604,cg20511089,cg22869366,cg22476084,cg23249207,cg11171549,cg20207029	FXYD6	TSS1500	Island=2,S_Shore=13	GO:0008150,biological_process|GO:0034220,ion transmembrane transport|GO:1903779,regulation of cardiac conduction|GO:2000649,regulation of sodium ion transmembrane transporter activity	GO:0003674,molecular_function|GO:0005216,ion channel activity|GO:0005515,protein binding|GO:0017080,sodium channel regulator activity	GO:0005886,plasma membrane|GO:0005886,plasma membrane|GO:0005887,integral component of plasma membrane		0.0424026	0.0783506	0.0766953	0.0785307	0.0937109	0.139703	0.148002	0.071181	0.173052	0.201238	0.218615	1.02745	0.544609	3.44237e-05	0.00114079	0.0102565
DMR_141	18	56529462	56530420	958	12	cg25401010,cg02404564,cg17675150,cg23309969,cg07776193,cg20295084,cg05800761,cg21867891,cg01495729,cg12406559,cg06487082,cg12737497	ZNF532	TSS1500	Island=1,N_Shore=11	GO:0006351,transcription, DNA-templated|GO:0006355,regulation of transcription, DNA-templated	GO:0003677,DNA binding|GO:0046872,metal ion binding	GO:0005634,nucleus		0.50958	0.484101	0.482591	0.514971	0.556882	0.671814	0.595221	0.672948	0.690549	0.679236	0.356518	0.953369	0.713725	6.02415e-05	0.00167598	0.0150682
DMR_142	16	67232921	67234167	1246	12	cg08721338,cg26952497,cg22050426,cg06494642,cg21567548,cg25341653,cg19514469,cg10452534,cg22417309,cg26178184,cg16113721,cg07716847	ELMO3	TSS200	Island=8,N_Shore=2,S_Shore=2	GO:0006909,phagocytosis|GO:0006915,apoptotic process|GO:0016477,cell migration	GO:0005515,protein binding|GO:0017124,SH3 domain binding	GO:0005737,cytoplasm	hsa05100 Bacterial invasion of epithelial cells - Homo sapiens (human)|hsa05131 Shigellosis - Homo sapiens (human)	0.305278	0.233412	0.308006	0.264506	0.28036	0.502287	0.460827	0.512253	0.515179	0.519343	0.351809	0.765555	0.534627	6.02415e-05	0.00167598	0.0150682
DMR_143	1	183154778	183155644	866	11	cg21378578,cg05366923,cg23696949,cg06211724,cg12552165,cg05929019,cg24146518,cg04218899,cg01949993,cg22346461,cg00208830	LAMC2	TSS1500	opensea=11	GO:0007155,cell adhesion|GO:0008284,positive regulation of cell proliferation|GO:0008544,epidermis development|GO:0022617,extracellular matrix disassembly|GO:0030198,extracellular matrix organization|GO:0030335,positive regulation of cell migration|GO:0031581,hemidesmosome assembly|GO:0048731,system development|GO:0070831,basement membrane assembly	GO:0008201,heparin binding	GO:0005576,extracellular region|GO:0005607,laminin-2 complex|GO:0005615,extracellular space|GO:0005938,cell cortex|GO:0016020,membrane|GO:0048471,perinuclear region of cytoplasm	hsa04151 PI3K-Akt signaling pathway - Homo sapiens (human)|hsa04510 Focal adhesion - Homo sapiens (human)|hsa04512 ECM-receptor interaction - Homo sapiens (human)|hsa05145 Toxoplasmosis - Homo sapiens (human)|hsa05146 Amoebiasis - Homo sapiens (human)|hsa05200 Pathways in cancer - Homo sapiens (human)|hsa05222 Small cell lung cancer - Homo sapiens (human)	0.246534	0.232606	0.242236	0.243241	0.248318	0.430111	0.362757	0.410447	0.41112	0.35922	0.25616	0.99313	0.480376	6.02415e-05	0.00167598	0.0150682
DMR_144	1	156046344	156047509	1165	10	cg26396535,cg03929057,cg09831055,cg06053528,cg16510127,cg06208270,cg16126393,cg11717597,cg23819092,cg02977575	MEX3A	3'UTR	Island=9,S_Shore=1		GO:0003723,RNA binding|GO:0046872,metal ion binding	GO:0000932,P-body|GO:0005634,nucleus|GO:0005829,cytosol		0.398269	0.385521	0.410905	0.431672	0.444425	0.633616	0.587159	0.633375	0.576891	0.627112	0.337784	0.858854	0.623028	5.16356e-05	0.0014823	0.013327
DMR_145	2	119599067	119600002	935	8	cg21215767,cg21811143,cg16794506,cg26946259,cg12379048,cg10846615,cg20627174,cg20175390	EN1,	3'UTR	Island=8	GO:0000122,negative regulation of transcription from RNA polymerase II promoter|GO:0001501,skeletal system development|GO:0008344,adult locomotory behavior|GO:0009653,anatomical structure morphogenesis|GO:0009953,dorsal/ventral pattern formation|GO:0009954,proximal/distal pattern formation|GO:0021549,cerebellum development|GO:0030901,midbrain development|GO:0030917,midbrain-hindbrain boundary dev…	GO:0000978,RNA polymerase II proximal promoter sequence-specific DNA binding|GO:0001078,transcriptional repressor activity, RNA polymerase II proximal promoter sequence-specific DNA binding,	GO:0005634,nucleus,		0.518821	0.678297	0.578173	0.465698	0.51909	0.265211	0.33615	0.284757	0.343102	0.272114	1.34302	3.18332	2.10354	3.44237e-05	0.00114079	0.0102565
DMR_146	17	1090123	1090557	434	7	cg23753807,cg16483033,cg04318619,cg06427816,cg06191034,cg20679082,cg19627538	ABR	1stExon	opensea=7	GO:0002692,negative regulation of cellular extravasation|GO:0007186,G-protein coupled receptor signaling pathway|GO:0007264,small GTPase mediated signal transduction|GO:0007420,brain development|GO:0030036,actin cytoskeleton organization|GO:0032496,response to lipopolysaccharide|GO:0035023,regulation of Rho protein signal transduction|GO:0042472,inner ear morphogenesis|GO:0043065,positive regulat…	GO:0005085,guanyl-nucleotide exchange factor activity|GO:0005089,Rho guanyl-nucleotide exchange factor activity|GO:0005096,GTPase activator activity|GO:0005096,GTPase activator activity	GO:0005829,cytosol|GO:0005886,plasma membrane|GO:0016020,membrane|GO:0016020,membrane		0.135869	0.120022	0.149695	0.131149	0.148366	0.180382	0.203067	0.141081	0.253605	0.274596	0.227701	1.2892	0.635649	3.44237e-05	0.00114079	0.0102565
DMR_147	6	33129850	33130034	184	4	cg10978034,cg19612068,cg22273555,cg17840334		IGR	S_Shore=4					0.064547	0.0357111	0.0652391	0.0541063	0.0723941	0.196338	0.166062	0.126147	0.255553	0.258709	0.239747	0.347987	0.30616	3.44237e-05	0.00114079	0.0102565
DMR_148	6	32013974	32015389	1415	19	cg13665850,cg07481886,cg12286154,cg11431261,cg13817395,cg17484510,cg03819671,cg07441854,cg16385684,cg22616343,cg04182226,cg13739666,cg04841389,cg25375757,cg09115485,cg26537323,cg09423875,cg14630748,cg20152300	TNXB	TSS200	opensea=19	GO:0007155,cell adhesion|GO:0030036,actin cytoskeleton organization|GO:0030199,collagen fibril organization|GO:0032963,collagen metabolic process|GO:0048251,elastic fiber assembly	GO:0005178,integrin binding|GO:0005515,protein binding|GO:0008201,heparin binding	GO:0005576,extracellular region|GO:0005578,proteinaceous extracellular matrix|GO:0005583,fibrillar collagen trimer|GO:0005615,extracellular space|GO:0005622,intracellular|GO:0031012,extracellular matrix|GO:0031012,extracellular matrix|GO:0031012,extracellular matrix|GO:0070062,extracellular exosome	hsa04151 PI3K-Akt signaling pathway - Homo sapiens (human)|hsa04510 Focal adhesion - Homo sapiens (human)|hsa04512 ECM-receptor interaction - Homo sapiens (human)|hsa05206 MicroRNAs in cancer - Homo sapiens (human)	0.191717	0.15644	0.219127	0.178929	0.251236	0.304051	0.267501	0.221601	0.316676	0.374981	0.32747	1.05371	0.605881	4.30296e-05	0.00131928	0.0118613
DMR_149	16	88946905	88947943	1038	11	cg14541481,cg02192204,cg15947276,cg25842974,cg15527835,cg18735586,cg20340994,cg05779527,cg25614396,cg08688816,cg05370094	CBFA2T3	Body	Island=6,N_Shore=2,S_Shore=3	GO:0001666,response to hypoxia|GO:0006351,transcription, DNA-templated|GO:0008283,cell proliferation|GO:0008285,negative regulation of cell proliferation|GO:0030851,granulocyte differentiation|GO:0032436,positive regulation of proteasomal ubiquitin-dependent protein catabolic process|GO:0045820,negative regulation of glycolytic process|GO:0045892,negative regulation of transcription, DNA-template…	GO:0003700,DNA binding transcription factor activity|GO:0003714,transcription corepressor activity|GO:0005515,protein binding|GO:0046872,metal ion binding	GO:0000139,Golgi membrane|GO:0005634,nucleus|GO:0005654,nucleoplasm|GO:0005730,nucleolus		0.354306	0.400334	0.468688	0.449437	0.560924	0.800151	0.581066	0.677938	0.719143	0.70098	0.353477	0.887383	0.632585	6.88474e-05	0.00183607	0.0165075
DMR_150	7	19158349	19158954	605	10	cg14391419,cg27334919,cg12307484,cg10126205,cg21424940,cg14499053,cg10624122,cg16168668,cg26279021,cg04904385	TWIST1,	TSS1500	S_Shore=10	GO:0000122,negative regulation of transcription from RNA polymerase II promoter|GO:0001503,ossification|GO:0001649,osteoblast differentiation|GO:0001701,in utero embryonic development|GO:0001764,neuron migration|GO:0001843,neural tube closure|GO:0003180,aortic valve morphogenesis|GO:0003183,mitral valve morphogenesis|GO:0003203,endocardial cushion morphogenesis|GO:0003253,cardiac neural crest cel…	GO:0000981,RNA polymerase II transcription factor activity, sequence-specific DNA binding|GO:0005515,protein binding|GO:0008134,transcription factor binding|GO:0019904,protein domain specific binding|GO:0042803,protein homodimerization activity|GO:0043425,bHLH transcription factor binding|GO:0046982,protein heterodimerization activity|GO:0070888,E-box binding,	GO:0005634,nucleus|GO:0005654,nucleoplasm,	hsa05205 Proteoglycans in cancer - Homo sapiens (human),	0.272723	0.298718	0.278901	0.275538	0.335623	0.600603	0.517553	0.596301	0.459092	0.463274	0.268073	0.666661	0.534926	6.02415e-05	0.00167598	0.0150682
DMR_151	22	45608345	45608713	368	10	cg20061654,cg12251779,cg21935981,cg07795766,cg10820551,cg22488367,cg04223044,cg14781778,cg02541592,cg20078807	C22orf9	Body	opensea=10					0.0505351	0.0339157	0.0530857	0.0447916	0.065337	0.0860675	0.0959889	0.0620386	0.187437	0.219674	0.217239	0.832028	0.370775	6.02415e-05	0.00167598	0.0150682
DMR_152	7	150758892	150759663	771	10	cg02673680,cg10842164,cg21467066,cg11749167,cg09988421,cg12199996,cg19698648,cg05593194,cg10904151,cg08788811	SLC4A2	TSS1500	S_Shelf=8,S_Shore=2	GO:0006820,anion transport|GO:0007283,spermatogenesis|GO:0015698,inorganic anion transport|GO:0015701,bicarbonate transport|GO:0035725,sodium ion transmembrane transport|GO:0048565,digestive tract development|GO:0051453,regulation of intracellular pH|GO:0098656,anion transmembrane transport	GO:0005452,inorganic anion exchanger activity|GO:0008509,anion transmembrane transporter activity|GO:0008510,sodium:bicarbonate symporter activity|GO:0015301,anion:anion antiporter activity|GO:0019899,enzyme binding	GO:0005886,plasma membrane|GO:0005887,integral component of plasma membrane|GO:0005925,focal adhesion|GO:0016020,membrane|GO:0016323,basolateral plasma membrane|GO:0016324,apical plasma membrane	hsa04970 Salivary secretion - Homo sapiens (human)|hsa04971 Gastric acid secretion - Homo sapiens (human)|hsa04972 Pancreatic secretion - Homo sapiens (human)|hsa04976 Bile secretion - Homo sapiens (human)	0.247832	0.193142	0.260106	0.20737	0.243232	0.389221	0.373605	0.358504	0.442779	0.449091	0.274484	0.772048	0.500366	7.74533e-05	0.00190755	0.0171503
DMR_153	9	97847911	97848789	878	10	cg13972491,cg14601621,cg09951047,cg02324722,cg12017968,cg00532885,cg20355301,cg08680173,cg09229423,cg02268620	C9orf3,MIR24-1,MIR3074	TSS1500	Island=4,N_Shore=3,S_Shore=3	GO:0002003,angiotensin maturation|GO:0006508,proteolysis|GO:0043171,peptide catabolic process,GO:0010667,negative regulation of cardiac muscle cell apoptotic process|GO:0016525,negative regulation of angiogenesis|GO:0035195,gene silencing by miRNA|GO:0035195,gene silencing by miRNA|GO:0061049,cell growth involved in cardiac muscle cell development|GO:0070374,positive regulation of ERK1 and ERK2 c…	GO:0004177,aminopeptidase activity|GO:0004177,aminopeptidase activity|GO:0008237,metallopeptidase activity|GO:0008270,zinc ion binding|GO:0042277,peptide binding|GO:0070006,metalloaminopeptidase activity,GO:1903231,mRNA binding involved in posttranscriptional gene silencing|GO:1903231,mRNA binding involved in posttranscriptional gene silencing,	GO:0005730,nucleolus|GO:0005737,cytoplasm|GO:0005829,cytosol,GO:0005615,extracellular space|GO:0070062,extracellular exosome,		0.454497	0.459941	0.544231	0.443054	0.53958	0.721431	0.596585	0.70371	0.73696	0.738669	0.375401	0.935904	0.659418	7.74533e-05	0.00190755	0.0171503
DMR_154	22	41074682	41075673	991	10	cg22458779,cg06264060,cg00902427,cg26959118,cg04572760,cg22920258,cg14218819,cg24371604,cg21342728,cg14701072	MCHR1	TSS1500	opensea=10	GO:0006091,generation of precursor metabolites and energy|GO:0007186,G-protein coupled receptor signaling pathway|GO:0007193,adenylate cyclase-inhibiting G-protein coupled receptor signaling pathway|GO:0007204,positive regulation of cytosolic calcium ion concentration|GO:0007218,neuropeptide signaling pathway|GO:0007268,chemical synaptic transmission|GO:0007631,feeding behavior	GO:0004930,G-protein coupled receptor activity|GO:0008188,neuropeptide receptor activity|GO:0030273,melanin-concentrating hormone receptor activity	GO:0005886,plasma membrane|GO:0005887,integral component of plasma membrane|GO:0097730,non-motile cilium	hsa04080 Neuroactive ligand-receptor interaction - Homo sapiens (human)	0.147679	0.132829	0.165973	0.152125	0.196799	0.353218	0.289546	0.29288	0.368894	0.398831	0.300609	0.659866	0.462783	7.74533e-05	0.00190755	0.0171503
DMR_155	10	50506748	50507214	466	9	cg10775039,cg08732300,cg06325088,cg08642731,cg13855776,cg00828709,cg08149223,cg22871947,cg13745632	C10orf71,C10orf71-AS1	TSS1500	opensea=9					0.0896157	0.074181	0.144486	0.0888378	0.130768	0.24996	0.224109	0.169817	0.298857	0.351142	0.222601	0.497416	0.393065	6.88474e-05	0.00183607	0.0165075
DMR_156	22	17680477	17680706	229	9	cg21144941,cg22910462,cg21830459,cg13248581,cg24127748,cg17333767,cg27534599,cg12317346,cg01972843	CECR1	TSS200	opensea=9					0.0978793	0.0672078	0.136614	0.0798091	0.106351	0.206348	0.249391	0.122811	0.326098	0.342334	0.316976	0.458769	0.388678	9.46652e-05	0.00213328	0.0191797
DMR_157	6	152011103	152011666	563	8	cg18745416,cg06611115,cg04211581,cg25338972,cg08161546,cg19449067,cg25155098,cg18007957	ESR1	TSS1500	opensea=8	GO:0000122,negative regulation of transcription from RNA polymerase II promoter|GO:0001547,antral ovarian follicle growth|GO:0002064,epithelial cell development|GO:0006338,chromatin remodeling|GO:0006351,transcription, DNA-templated|GO:0006355,regulation of transcription, DNA-templated|GO:0006357,regulation of transcription from RNA polymerase II promoter|GO:0006366,transcription from RNA polymer…	GO:0000978,RNA polymerase II proximal promoter sequence-specific DNA binding|GO:0001046,core promoter sequence-specific DNA binding|GO:0001077,transcriptional activator activity, RNA polymerase II proximal promoter sequence-specific DNA binding|GO:0001093,TFIIB-class transcription factor binding|GO:0001223,transcription coactivator binding|GO:0003682,chromatin binding|GO:0003700,DNA binding trans…	GO:0000790,nuclear chromatin|GO:0005634,nucleus|GO:0005654,nucleoplasm|GO:0005737,cytoplasm|GO:0005794,Golgi apparatus|GO:0005886,plasma membrane|GO:0016020,membrane|GO:0016021,integral component of membrane|GO:0035327,transcriptionally active chromatin|GO:0043234,protein complex|GO:0097550,transcriptional preinitiation complex	hsa01522 Endocrine resistance - Homo sapiens (human)|hsa04915 Estrogen signaling pathway - Homo sapiens (human)|hsa04917 Prolactin signaling pathway - Homo sapiens (human)|hsa04919 Thyroid hormone signaling pathway - Homo sapiens (human)|hsa04961 Endocrine and other factor-regulated calcium reabsorption - Homo sapiens (human)|hsa05205 Proteoglycans in cancer - Homo sapiens (human)|hsa05224 Breast…	0.0347437	0.0267457	0.0418649	0.02752	0.0394765	0.0993208	0.111363	0.0609663	0.156365	0.164203	0.180741	0.598678	0.353001	4.30296e-05	0.00131928	0.0118613
DMR_158	12	13132477	13133131	654	8	cg10942941,cg10322935,cg02753134,cg23557964,cg18390203,cg21919117,cg08793501,cg03611265	LOC100506314,HEBP1	TSS1500	opensea=8	,GO:0007186,G-protein coupled receptor signaling pathway|GO:0007623,circadian rhythm	,GO:0020037,heme binding	,GO:0005576,extracellular region|GO:0005737,cytoplasm|GO:0070062,extracellular exosome		0.592959	0.670429	0.635162	0.64437	0.71379	0.397281	0.414297	0.372051	0.470285	0.54408	0.983715	2.85664	1.78417	6.88474e-05	0.00183607	0.0165075
DMR_159	17	7493150	7493710	560	8	cg15910588,cg02256874,cg14187123,cg13159929,cg01029592,cg07488259,cg13483263,cg12615880	SOX15	TSS1500	S_Shore=8	GO:0000122,negative regulation of transcription from RNA polymerase II promoter|GO:0006325,chromatin organization|GO:0006355,regulation of transcription, DNA-templated|GO:0006357,regulation of transcription from RNA polymerase II promoter|GO:0008584,male gonad development|GO:0014718,positive regulation of satellite cell activation involved in skeletal muscle regeneration|GO:0030154,cell different…	GO:0000981,RNA polymerase II transcription factor activity, sequence-specific DNA binding|GO:0003677,DNA binding|GO:0003682,chromatin binding|GO:0003700,DNA binding transcription factor activity|GO:0005515,protein binding|GO:0046982,protein heterodimerization activity	GO:0005634,nucleus|GO:0005737,cytoplasm|GO:0044798,nuclear transcription factor complex		0.47256	0.495477	0.490406	0.490182	0.55705	0.718542	0.682175	0.710558	0.709092	0.739084	0.505173	0.892663	0.70293	6.88474e-05	0.00183607	0.0165075
DMR_160	6	32078398	32078624	226	8	cg01178040,cg13823701,cg10736208,cg14620908,cg05619785,cg15773251,cg13654183,cg25067686	TNXB	TSS1500	opensea=8	GO:0007155,cell adhesion|GO:0030036,actin cytoskeleton organization|GO:0030199,collagen fibril organization|GO:0032963,collagen metabolic process|GO:0048251,elastic fiber assembly	GO:0005178,integrin binding|GO:0005515,protein binding|GO:0008201,heparin binding	GO:0005576,extracellular region|GO:0005578,proteinaceous extracellular matrix|GO:0005583,fibrillar collagen trimer|GO:0005615,extracellular space|GO:0005622,intracellular|GO:0031012,extracellular matrix|GO:0031012,extracellular matrix|GO:0031012,extracellular matrix|GO:0070062,extracellular exosome	hsa04151 PI3K-Akt signaling pathway - Homo sapiens (human)|hsa04510 Focal adhesion - Homo sapiens (human)|hsa04512 ECM-receptor interaction - Homo sapiens (human)|hsa05206 MicroRNAs in cancer - Homo sapiens (human)	0.0623276	0.0398688	0.0779483	0.0519112	0.0802319	0.129728	0.118187	0.0835685	0.19803	0.230873	0.264391	0.69204	0.382245	7.74533e-05	0.00190755	0.0171503
DMR_161	3	125820372	125820752	380	8	cg25365006,cg24663845,cg25329160,cg07809479,cg10798682,cg14598764,cg24256027,cg20177385	SLC41A3	TSS1500	opensea=8	GO:0055085,transmembrane transport|GO:0098655,cation transmembrane transport	GO:0005515,protein binding|GO:0008324,cation transmembrane transporter activity	GO:0005886,plasma membrane|GO:0005886,plasma membrane|GO:0016021,integral component of membrane		0.0709917	0.0761122	0.104295	0.0860783	0.103964	0.211202	0.215066	0.130233	0.292212	0.321213	0.236253	0.508638	0.353942	8.60593e-05	0.00198907	0.0178832
DMR_162	6	112374876	112375383	507	8	cg13953276,cg10525372,cg17694848,cg24299174,cg26528298,cg21773633,cg19804071,cg13022459	WISP3	TSS1500	opensea=8	GO:0001558,regulation of cell growth|GO:0007155,cell adhesion|GO:0007165,signal transduction|GO:0007267,cell-cell signaling|GO:0010469,regulation of receptor activity|GO:0060548,negative regulation of cell death	GO:0005178,integrin binding|GO:0005520,insulin-like growth factor binding|GO:0008083,growth factor activity|GO:0008201,heparin binding	GO:0005578,proteinaceous extracellular matrix|GO:0005615,extracellular space		0.318063	0.195706	0.356992	0.292224	0.372512	0.623765	0.437574	0.49351	0.565025	0.611095	0.350854	0.951276	0.511423	0.000103271	0.00225943	0.0203139
DMR_163	3	155421735	155422159	424	7	cg21262198,cg23541926,cg18623216,cg11932158,cg26690511,cg07480762,cg01671681	PLCH1	TSS200	opensea=7	GO:0016042,lipid catabolic process|GO:0043647,inositol phosphate metabolic process|GO:0048015,phosphatidylinositol-mediated signaling	GO:0004435,phosphatidylinositol phospholipase C activity|GO:0004871,signal transducer activity|GO:0005509,calcium ion binding|GO:0050429,calcium-dependent phospholipase C activity	GO:0005737,cytoplasm|GO:0005829,cytosol|GO:0005886,plasma membrane|GO:0043231,intracellular membrane-bounded organelle	hsa00562 Inositol phosphate metabolism - Homo sapiens (human)|hsa01100 Metabolic pathways - Homo sapiens (human)	0.814735	0.859165	0.829235	0.847797	0.876526	0.671109	0.615581	0.602379	0.659789	0.656186	1.103	1.70221	1.35623	7.74533e-05	0.00190755	0.0171503
DMR_164	1	3276354	3276786	432	7	cg06911744,cg26000536,cg27588093,cg05013909,cg07479843,cg12593511,cg25849029	PRDM16	Body	S_Shore=7	GO:0000122,negative regulation of transcription from RNA polymerase II promoter|GO:0006351,transcription, DNA-templated|GO:0022008,neurogenesis|GO:0030512,negative regulation of transforming growth factor beta receptor signaling pathway|GO:0030512,negative regulation of transforming growth factor beta receptor signaling pathway|GO:0034968,histone lysine methylation|GO:0035019,somatic stem cell po…	GO:0003713,transcription coactivator activity|GO:0005515,protein binding|GO:0018024,histone-lysine N-methyltransferase activity|GO:0033613,activating transcription factor binding|GO:0043565,sequence-specific DNA binding|GO:0046332,SMAD binding|GO:0046872,metal ion binding	GO:0005634,nucleus|GO:0005654,nucleoplasm|GO:0005829,cytosol|GO:0005829,cytosol|GO:0016235,aggresome|GO:0017053,transcriptional repressor complex		0.452611	0.449647	0.485413	0.485587	0.563873	0.766286	0.65677	0.690878	0.702584	0.744772	0.268548	0.98254	0.619001	8.60593e-05	0.00198907	0.0178832
DMR_165	13	76444850	76445372	522	7	cg19050940,cg14251216,cg18517966,cg10645091,cg16368959,cg20806725,cg18273457	,LMO7DN	TSS200	opensea=7					0.566169	0.463244	0.553252	0.573424	0.638475	0.289667	0.327308	0.174842	0.421462	0.472441	1.1846	2.5553	1.73539	8.60593e-05	0.00198907	0.0178832
DMR_166	10	81967195	81967666	471	7	cg10775231,cg11647108,cg06813382,cg09614479,cg25677116,cg25660691,cg08880670	,LINC00857	TSS200	Island=5,S_Shore=2					0.060175	0.0550548	0.0777481	0.071741	0.102318	0.183692	0.169671	0.100833	0.248558	0.292646	0.251511	0.525264	0.363199	9.46652e-05	0.00213328	0.0191797
DMR_167	1	26880547	26881009	462	6	cg09641213,cg16395432,cg23955417,cg24468934,cg11377047,cg00359365	MIR1976	TSS1500	opensea=6					0.708812	0.749036	0.722285	0.752283	0.776003	0.518721	0.516995	0.426312	0.502256	0.530277	1.23631	1.91284	1.53167	7.74533e-05	0.00190755	0.0171503
DMR_168	19	46806670	46807272	602	6	cg06174330,cg01809838,cg01552731,cg25196389,cg26749414,cg23548163	HIF3A	5'UTR	Island=3,N_Shore=3	GO:0001525,angiogenesis|GO:0006366,transcription from RNA polymerase II promoter|GO:0006915,apoptotic process|GO:0016567,protein ubiquitination|GO:0043687,post-translational protein modification|GO:0045944,positive regulation of transcription from RNA polymerase II promoter|GO:0061418,regulation of transcription from RNA polymerase II promoter in response to hypoxia	GO:0000981,RNA polymerase II transcription factor activity, sequence-specific DNA binding|GO:0003677,DNA binding|GO:0046983,protein dimerization activity	GO:0005634,nucleus|GO:0005654,nucleoplasm|GO:0005654,nucleoplasm|GO:0005739,mitochondrion|GO:0005829,cytosol|GO:0005829,cytosol|GO:0005886,plasma membrane|GO:0016607,nuclear speck		0.400257	0.420855	0.430068	0.445068	0.505729	0.669811	0.570351	0.640314	0.689627	0.69936	0.373086	0.814478	0.631899	8.60593e-05	0.00198907	0.0178832
DMR_169	4	1294783	1295078	295	6	cg16934826,cg24597363,cg23447233,cg09491380,cg21326139,cg21167046	MAEA	Body	opensea=6	GO:0007010,cytoskeleton organization|GO:0007049,cell cycle|GO:0007155,cell adhesion|GO:0007346,regulation of mitotic cell cycle|GO:0033033,negative regulation of myeloid cell apoptotic process|GO:0042787,protein ubiquitination involved in ubiquitin-dependent protein catabolic process|GO:0043161,proteasome-mediated ubiquitin-dependent protein catabolic process|GO:0043249,erythrocyte maturation|GO:…	GO:0003779,actin binding|GO:0004842,ubiquitin-protein transferase activity	GO:0005634,nucleus|GO:0005654,nucleoplasm|GO:0005819,spindle|GO:0005826,actomyosin contractile ring|GO:0005856,cytoskeleton|GO:0005887,integral component of plasma membrane|GO:0016363,nuclear matrix|GO:0034657,GID complex		0.715017	0.718658	0.71794	0.734076	0.783004	0.593723	0.516946	0.548101	0.541451	0.58752	1.22219	1.6785	1.36848	0.000103271	0.00225943	0.0203139
DMR_170	1	156261200	156261403	203	6	cg08469215,cg21003380,cg20570016,cg06497051,cg16343331,cg10096929	TMEM79	Body	Island=6	GO:0002070,epithelial cell maturation|GO:0031069,hair follicle morphogenesis|GO:0042335,cuticle development|GO:0045055,regulated exocytosis|GO:0045684,positive regulation of epidermis development|GO:0061436,establishment of skin barrier|GO:0070268,cornification	GO:0005515,protein binding|GO:0042802,identical protein binding	GO:0005765,lysosomal membrane|GO:0016021,integral component of membrane|GO:0032588,trans-Golgi network membrane		0.0524242	0.020963	0.0350881	0.0351862	0.072039	0.125019	0.110208	0.0530593	0.170736	0.20882	0.230549	0.770324	0.375477	0.000111877	0.00243589	0.0219004
DMR_171	14	52780158	52780634	476	5	cg05614059,cg21502048,cg16134491,cg06738602,cg26674715	PTGER2	TSS1500	N_Shore=5	GO:0007186,G-protein coupled receptor signaling pathway|GO:0007189,adenylate cyclase-activating G-protein coupled receptor signaling pathway|GO:0032496,response to lipopolysaccharide|GO:0032570,response to progesterone|GO:0042127,regulation of cell proliferation|GO:0071380,cellular response to prostaglandin E stimulus|GO:0071380,cellular response to prostaglandin E stimulus	GO:0004957,prostaglandin E receptor activity	GO:0005622,intracellular|GO:0005886,plasma membrane|GO:0005887,integral component of plasma membrane	hsa04024 cAMP signaling pathway - Homo sapiens (human)|hsa04080 Neuroactive ligand-receptor interaction - Homo sapiens (human)|hsa04750 Inflammatory mediator regulation of TRP channels - Homo sapiens (human)|hsa04924 Renin secretion - Homo sapiens (human)|hsa05200 Pathways in cancer - Homo sapiens (human)	0.28049	0.332819	0.30324	0.312883	0.370812	0.130936	0.1322	0.0924269	0.154895	0.176408	0.986473	3.23866	2.16289	4.30296e-05	0.00131928	0.0118613
DMR_172	3	11610138	11610506	368	5	cg15736553,cg05361415,cg21527078,cg10960266,cg10202902	VGLL4	TSS200	Island=4,S_Shore=1	GO:0006351,transcription, DNA-templated|GO:0006355,regulation of transcription, DNA-templated	GO:0005515,protein binding	GO:0005634,nucleus		0.0908283	0.0514372	0.121573	0.0608501	0.0992073	0.177979	0.196471	0.100946	0.297588	0.301004	0.259921	0.688725	0.407293	8.60593e-05	0.00198907	0.0178832
DMR_173	7	27192339	27192656	317	4	cg23263937,cg01414882,cg02919960,cg26032198		IGR	N_Shore=1,S_Shore=3					0.0374283	0.0372448	0.0382598	0.0432369	0.0423026	0.171195	0.116962	0.134199	0.129669	0.108346	0.184982	0.91578	0.438297	4.30296e-05	0.00131928	0.0118613
DMR_174	17	59478068	59478579	511	4	cg11631427,cg04245057,cg02577108,cg11031701	TBX2	Body	Island=4	GO:0000122,negative regulation of transcription from RNA polymerase II promoter|GO:0001947,heart looping|GO:0003148,outflow tract septum morphogenesis|GO:0003151,outflow tract morphogenesis|GO:0003203,endocardial cushion morphogenesis|GO:0003256,regulation of transcription from RNA polymerase II promoter involved in myocardial precursor cell differentiation|GO:0006351,transcription, DNA-templated…	GO:0000978,RNA polymerase II proximal promoter sequence-specific DNA binding|GO:0001078,transcriptional repressor activity, RNA polymerase II proximal promoter sequence-specific DNA binding|GO:0003677,DNA binding|GO:0005515,protein binding|GO:0043565,sequence-specific DNA binding	GO:0005634,nucleus|GO:0005667,transcription factor complex		0.316729	0.37385	0.354279	0.344953	0.406209	0.201846	0.161763	0.136673	0.209828	0.211188	0.868191	2.81864	1.82046	7.74533e-05	0.00190755	0.0171503
DMR_175	1	210407677	210407973	296	4	cg15926004,cg18234296,cg16118387,cg05723989	C1orf133	TSS1500	S_Shore=4					0.0659308	0.0446427	0.0984568	0.0540848	0.0840986	0.180495	0.165053	0.126828	0.231062	0.277836	0.24546	0.62471	0.40745	8.60593e-05	0.00198907	0.0178832
DMR_176	5	66254655	66255020	365	4	cg06040990,cg10012517,cg12264517,cg14105271	MAST4	TSS200	opensea=4	GO:0007010,cytoskeleton organization|GO:0018105,peptidyl-serine phosphorylation|GO:0035556,intracellular signal transduction	GO:0000287,magnesium ion binding|GO:0004674,protein serine/threonine kinase activity|GO:0005524,ATP binding	GO:0005622,intracellular|GO:0005737,cytoplasm		0.0462131	0.0441622	0.0825324	0.0517099	0.0718801	0.148721	0.151936	0.0810654	0.234363	0.264005	0.299122	0.418011	0.334885	9.46652e-05	0.00213328	0.0191797
DMR_177	3	147125712	147127010	1298	23	cg14456683,cg08855449,cg12419052,cg00475509,cg16181396,cg23449696,cg26014538,cg17280346,cg16636671,cg23468878,cg17546247,cg11142389,cg07291439,cg05700079,cg24686610,cg12965599,cg26400885,cg08070771,cg02519751,cg10107050,cg23189410,cg15002294,cg09241332	ZIC1,ZIC4	TSS1500	Island=1,N_Shore=22	GO:0006366,transcription from RNA polymerase II promoter|GO:0007389,pattern specification process|GO:0007420,brain development|GO:0007628,adult walking behavior|GO:0008589,regulation of smoothened signaling pathway|GO:0021510,spinal cord development|GO:0030154,cell differentiation|GO:0042307,positive regulation of protein import into nucleus|GO:0042472,inner ear morphogenesis|GO:0045893,positive …	GO:0000978,RNA polymerase II proximal promoter sequence-specific DNA binding|GO:0001077,transcriptional activator activity, RNA polymerase II proximal promoter sequence-specific DNA binding|GO:0003700,DNA binding transcription factor activity|GO:0003700,DNA binding transcription factor activity|GO:0046872,metal ion binding,GO:0003677,DNA binding|GO:0046872,metal ion binding	GO:0005634,nucleus|GO:0005654,nucleoplasm|GO:0005737,cytoplasm,GO:0005634,nucleus		0.128722	0.139057	0.139921	0.121011	0.127052	0.228695	0.232281	0.236052	0.199505	0.200164	0.319276	0.856301	0.597367	5.16356e-05	0.0014823	0.013327
DMR_178	11	6518108	6518907	799	13	cg21500354,cg16126079,cg10703481,cg25368651,cg04732345,cg22014972,cg26821848,cg14370752,cg22908616,cg16322014,cg04292941,cg16082253,cg18103150	DNHD1	TSS1500	opensea=13	GO:0003341,cilium movement|GO:0036159,inner dynein arm assembly	GO:0005524,ATP binding|GO:0008569,ATP-dependent microtubule motor activity, minus-end-directed|GO:0045503,dynein light chain binding|GO:0045505,dynein intermediate chain binding|GO:0051959,dynein light intermediate chain binding	GO:0036156,inner dynein arm|GO:0070062,extracellular exosome		0.47032	0.471245	0.498254	0.49062	0.503516	0.694894	0.650024	0.650735	0.705629	0.696857	0.352774	0.921611	0.667273	5.16356e-05	0.0014823	0.013327
DMR_179	8	102503892	102504903	1011	13	cg14202477,cg07637175,cg26643631,cg17885542,cg20574490,cg03780851,cg11397370,cg20342184,cg05458052,cg16435779,cg23973429,cg25330243,cg08334760	GRHL2	TSS1500	Island=6,N_Shore=6,S_Shore=1	GO:0001843,neural tube closure|GO:0003208,cardiac ventricle morphogenesis|GO:0003382,epithelial cell morphogenesis|GO:0003382,epithelial cell morphogenesis|GO:0006366,transcription from RNA polymerase II promoter|GO:0007155,cell adhesion|GO:0007420,brain development|GO:0008283,cell proliferation|GO:0008544,epidermis development|GO:0021915,neural tube development|GO:0034329,cell junction assembly|…	GO:0001161,intronic transcription regulatory region sequence-specific DNA binding|GO:0001228,transcriptional activator activity, RNA polymerase II transcription regulatory region sequence-specific DNA binding|GO:0003700,DNA binding transcription factor activity|GO:0005515,protein binding|GO:0031490,chromatin DNA binding|GO:0043565,sequence-specific DNA binding	GO:0005634,nucleus|GO:0005654,nucleoplasm|GO:0005911,cell-cell junction|GO:0016020,membrane		0.0572261	0.0634109	0.050146	0.061103	0.0544274	0.139684	0.131187	0.193704	0.121004	0.13351	0.242267	0.782676	0.452823	5.16356e-05	0.0014823	0.013327
DMR_180	17	9862752	9863293	541	12	cg10237765,cg04267691,cg17949821,cg12443669,cg17479840,cg26996616,cg11892027,cg06377635,cg12697325,cg04788418,cg17192115,cg12833931	GAS7	TSS1500	opensea=12	GO:0006355,regulation of transcription, DNA-templated|GO:0007050,cell cycle arrest|GO:0007399,nervous system development|GO:0030154,cell differentiation	GO:0003700,DNA binding transcription factor activity|GO:0005515,protein binding	GO:0005737,cytoplasm		0.19234	0.169196	0.211356	0.203145	0.234635	0.457371	0.373898	0.410218	0.374846	0.393584	0.365509	0.603462	0.494571	7.74533e-05	0.00190755	0.0171503
DMR_181	16	75282051	75283093	1042	12	cg03451204,cg14147394,cg22837325,cg04168235,cg24155383,cg16502726,cg02490847,cg25622325,cg16816806,cg05229802,cg01262865,cg04914057	BCAR1	TSS1500	N_Shelf=9,N_Shore=3	GO:0001558,regulation of cell growth|GO:0007015,actin filament organization|GO:0007155,cell adhesion|GO:0007173,epidermal growth factor receptor signaling pathway|GO:0007186,G-protein coupled receptor signaling pathway|GO:0007186,G-protein coupled receptor signaling pathway|GO:0007229,integrin-mediated signaling pathway|GO:0008283,cell proliferation|GO:0008286,insulin receptor signaling pathway|G…	GO:0004871,signal transducer activity|GO:0005515,protein binding|GO:0017124,SH3 domain binding|GO:0019901,protein kinase binding	GO:0001726,ruffle|GO:0005737,cytoplasm|GO:0005829,cytosol|GO:0005886,plasma membrane|GO:0005925,focal adhesion|GO:0005925,focal adhesion|GO:0015629,actin cytoskeleton|GO:0030027,lamellipodium	hsa04015 Rap1 signaling pathway - Homo sapiens (human)|hsa04062 Chemokine signaling pathway - Homo sapiens (human)|hsa04510 Focal adhesion - Homo sapiens (human)|hsa04670 Leukocyte transendothelial migration - Homo sapiens (human)|hsa04810 Regulation of actin cytoskeleton - Homo sapiens (human)|hsa05100 Bacterial invasion of epithelial cells - Homo sapiens (human)	0.113741	0.0854471	0.132727	0.124607	0.141071	0.261303	0.250524	0.15056	0.297306	0.326603	0.296734	0.791142	0.437124	7.74533e-05	0.00190755	0.0171503
DMR_182	1	6526049	6526583	534	12	cg16681526,cg23114616,cg03893150,cg10539898,cg25491951,cg12814070,cg02084087,cg02064442,cg04500986,cg10059687,cg11756870,cg26056577	TNFRSF25,PLEKHG5	TSS1500	Island=4,S_Shore=8	GO:0006915,apoptotic process|GO:0006954,inflammatory response|GO:0006955,immune response|GO:0007165,signal transduction|GO:0007166,cell surface receptor signaling pathway|GO:0007275,multicellular organism development|GO:0032496,response to lipopolysaccharide|GO:0033209,tumor necrosis factor-mediated signaling pathway|GO:0042127,regulation of cell proliferation|GO:0042981,regulation of apoptotic p…	GO:0004872,receptor activity|GO:0005031,tumor necrosis factor-activated receptor activity,GO:0004871,signal transducer activity|GO:0005085,guanyl-nucleotide exchange factor activity|GO:0005089,Rho guanyl-nucleotide exchange factor activity	GO:0005576,extracellular region|GO:0005829,cytosol|GO:0005886,plasma membrane|GO:0005886,plasma membrane|GO:0005887,integral component of plasma membrane,GO:0005737,cytoplasm|GO:0005829,cytosol|GO:0005886,plasma membrane|GO:0005911,cell-cell junction|GO:0030027,lamellipodium|GO:0030139,endocytic vesicle|GO:0048471,perinuclear region of cytoplasm	hsa04060 Cytokine-cytokine receptor interaction - Homo sapiens (human),hsa05200 Pathways in cancer - Homo sapiens (human)	0.331302	0.330425	0.349467	0.352603	0.400096	0.624349	0.520392	0.581078	0.521203	0.531341	0.328466	0.946329	0.576364	7.74533e-05	0.00190755	0.0171503
DMR_183	6	44186914	44187674	760	12	cg17217665,cg07053014,cg11452354,cg04742345,cg10519140,cg13793145,cg01993576,cg27078824,cg23737112,cg04175292,cg03634967,cg06638377	SLC29A1	TSS1500	Island=4,N_Shore=6,S_Shore=2	GO:0006139,nucleobase-containing compound metabolic process|GO:0007595,lactation|GO:0015858,nucleoside transport|GO:0015862,uridine transport|GO:0030431,sleep|GO:0060079,excitatory postsynaptic potential|GO:0071333,cellular response to glucose stimulus|GO:0071456,cellular response to hypoxia|GO:1901642,nucleoside transmembrane transport	GO:0005337,nucleoside transmembrane transporter activity	GO:0005886,plasma membrane|GO:0005887,integral component of plasma membrane|GO:0016020,membrane|GO:0016323,basolateral plasma membrane|GO:0016324,apical plasma membrane|GO:0098794,postsynapse	hsa05034 Alcoholism - Homo sapiens (human)	0.231938	0.240297	0.257472	0.219694	0.307185	0.122569	0.150999	0.075114	0.109531	0.129827	1.05215	3.45823	2.16628	7.74533e-05	0.00190755	0.0171503
DMR_184	10	45495435	45496315	880	11	cg00848594,cg15601807,cg21080450,cg00899659,cg26686009,cg01614759,cg18382353,cg16512882,cg14539394,cg23456144,cg15078013	C10orf25	3'UTR	Island=1,N_Shore=10			GO:0005576,extracellular region		0.356798	0.409381	0.421363	0.365463	0.420968	0.259749	0.298501	0.253484	0.240293	0.31484	0.965724	2.26263	1.54725	7.74533e-05	0.00190755	0.0171503
DMR_185	17	46607828	46608570	742	11	cg26687072,cg24948406,cg04904318,cg13752649,cg18642924,cg22660933,cg08076955,cg07823492,cg10558129,cg02497558,cg26634219	HOXB1	TSS1500	Island=6,S_Shore=5	GO:0006355,regulation of transcription, DNA-templated|GO:0006366,transcription from RNA polymerase II promoter|GO:0007275,multicellular organism development|GO:0007389,pattern specification process|GO:0009952,anterior/posterior pattern specification|GO:0021570,rhombomere 4 development|GO:0021571,rhombomere 5 development|GO:0021612,facial nerve structural organization|GO:0021754,facial nucleus dev…	GO:0000977,RNA polymerase II regulatory region sequence-specific DNA binding|GO:0000978,RNA polymerase II proximal promoter sequence-specific DNA binding|GO:0001077,transcriptional activator activity, RNA polymerase II proximal promoter sequence-specific DNA binding|GO:0001228,transcriptional activator activity, RNA polymerase II transcription regulatory region sequence-specific DNA binding|GO:00…	GO:0005634,nucleus	hsa04550 Signaling pathways regulating pluripotency of stem cells - Homo sapiens (human)	0.235167	0.226532	0.288588	0.182585	0.191147	0.386725	0.475785	0.414048	0.412661	0.450598	0.348509	0.719062	0.517716	7.74533e-05	0.00190755	0.0171503
DMR_186	6	33135269	33136511	1242	11	cg00933415,cg24594224,cg22748722,cg26888727,cg20901684,cg09344631,cg14812123,cg10290180,cg17321298,cg11761176,cg14043298	COL11A2	Body	opensea=11	GO:0001501,skeletal system development|GO:0001501,skeletal system development|GO:0007605,sensory perception of sound|GO:0030199,collagen fibril organization|GO:0030574,collagen catabolic process|GO:0051216,cartilage development|GO:0060021,palate development|GO:0060023,soft palate development	GO:0005515,protein binding|GO:0030020,extracellular matrix structural constituent conferring tensile strength|GO:0030674,protein binding, bridging|GO:0046872,metal ion binding	GO:0005576,extracellular region|GO:0005592,collagen type XI trimer|GO:0005788,endoplasmic reticulum lumen	hsa04974 Protein digestion and absorption - Homo sapiens (human)	0.647215	0.578114	0.661088	0.616257	0.653179	0.826105	0.753198	0.816565	0.829671	0.813917	0.471447	0.927531	0.771666	7.74533e-05	0.00190755	0.0171503
DMR_187	11	62621178	62622234	1056	10	cg00666295,cg05512483,cg03431111,cg18159646,cg15172739,cg21613307,cg09448652,cg27033919,cg02905828,cg09345320	SNORD22,SNORD30	TSS1500	N_Shelf=2,N_Shore=8					0.180303	0.208177	0.204036	0.198793	0.205644	0.372316	0.333189	0.362544	0.374959	0.366835	0.270061	0.712256	0.478161	8.60593e-05	0.00198907	0.0178832
DMR_188	21	36259067	36259797	730	10	cg09889857,cg06758350,cg14937633,cg02869559,cg12477880,cg20418711,cg01725383,cg00994804,cg12083928,cg07511671	RUNX1	5'UTR	Island=6,N_Shore=1,S_Shore=3	GO:0001503,ossification|GO:0001959,regulation of cytokine-mediated signaling pathway|GO:0002062,chondrocyte differentiation|GO:0006366,transcription from RNA polymerase II promoter|GO:0030097,hemopoiesis|GO:0030111,regulation of Wnt signaling pathway|GO:0030854,positive regulation of granulocyte differentiation|GO:0032743,positive regulation of interleukin-2 production|GO:0033146,regulation of in…	GO:0000977,RNA polymerase II regulatory region sequence-specific DNA binding|GO:0000977,RNA polymerase II regulatory region sequence-specific DNA binding|GO:0001047,core promoter binding|GO:0001228,transcriptional activator activity, RNA polymerase II transcription regulatory region sequence-specific DNA binding|GO:0001228,transcriptional activator activity, RNA polymerase II transcription regula…	GO:0005634,nucleus|GO:0005654,nucleoplasm|GO:0005654,nucleoplasm|GO:0005829,cytosol|GO:0043231,intracellular membrane-bounded organelle	hsa04530 Tight junction - Homo sapiens (human)|hsa04659 Th17 cell differentiation - Homo sapiens (human)|hsa05200 Pathways in cancer - Homo sapiens (human)|hsa05202 Transcriptional misregulation in cancer - Homo sapiens (human)|hsa05220 Chronic myeloid leukemia - Homo sapiens (human)|hsa05221 Acute myeloid leukemia - Homo sapiens (human)	0.0604554	0.0389313	0.0398752	0.0421735	0.036368	0.0650589	0.0958189	0.0564281	0.181039	0.12609	0.20363	0.75252	0.407986	8.60593e-05	0.00198907	0.0178832
DMR_189	5	54281198	54281733	535	10	cg14972155,cg20673840,cg20451680,cg21180956,cg10631947,cg24403549,cg16462183,cg20059697,cg13106512,cg06837426	ESM1	TSS1500	opensea=10	GO:0001525,angiogenesis|GO:0001558,regulation of cell growth|GO:0002040,sprouting angiogenesis|GO:0008284,positive regulation of cell proliferation|GO:1902204,positive regulation of hepatocyte growth factor receptor signaling pathway	GO:0005171,hepatocyte growth factor receptor binding|GO:0005178,integrin binding|GO:0005520,insulin-like growth factor binding	GO:0005576,extracellular region		0.0565389	0.0701737	0.0771183	0.0534555	0.0700795	0.139444	0.144934	0.0998906	0.202841	0.188234	0.264012	0.641079	0.392559	8.60593e-05	0.00198907	0.0178832
DMR_190	5	134366162	134367807	1645	10	cg01646828,cg21614303,cg10740944,cg03347590,cg23064601,cg02213684,cg02495310,cg08373003,cg13715631,cg02100373	C5orf66,PITX1	TSS1500	Island=4,N_Shore=4,S_Shore=2	,GO:0001501,skeletal system development|GO:0006366,transcription from RNA polymerase II promoter|GO:0009653,anatomical structure morphogenesis|GO:0014707,branchiomeric skeletal muscle development|GO:0021983,pituitary gland development|GO:0035116,embryonic hindlimb morphogenesis|GO:0045892,negative regulation of transcription, DNA-templated|GO:0045944,positive regulation of transcription from RNA …	,GO:0000978,RNA polymerase II proximal promoter sequence-specific DNA binding|GO:0001077,transcriptional activator activity, RNA polymerase II proximal promoter sequence-specific DNA binding|GO:0001085,RNA polymerase II transcription factor binding|GO:0001190,transcriptional activator activity, RNA polymerase II transcription factor binding|GO:0003700,DNA binding transcription factor activity|GO:…	,GO:0005634,nucleus|GO:0005667,transcription factor complex|GO:0005730,nucleolus|GO:0005737,cytoplasm		0.0622733	0.0420707	0.0615324	0.0452433	0.0460846	0.133451	0.132413	0.110462	0.146	0.12209	0.248864	0.768061	0.441613	8.60593e-05	0.00198907	0.0178832
DMR_191	16	55512521	55513191	670	9	cg09530163,cg05723087,cg08318842,cg12317456,cg12840361,cg16841246,cg01821058,cg27642062,cg14400118	MMP2	TSS1500	N_Shore=9	GO:0001525,angiogenesis|GO:0001666,response to hypoxia|GO:0001955,blood vessel maturation|GO:0001957,intramembranous ossification|GO:0006508,proteolysis|GO:0007566,embryo implantation|GO:0022617,extracellular matrix disassembly|GO:0030574,collagen catabolic process|GO:0035987,endodermal cell differentiation|GO:0044267,cellular protein metabolic process|GO:0045089,positive regulation of innate imm…	GO:0004222,metalloendopeptidase activity|GO:0004252,serine-type endopeptidase activity|GO:0004252,serine-type endopeptidase activity|GO:0005515,protein binding|GO:0008237,metallopeptidase activity|GO:0008270,zinc ion binding	GO:0005576,extracellular region|GO:0005578,proteinaceous extracellular matrix|GO:0005615,extracellular space|GO:0005634,nucleus|GO:0005739,mitochondrion|GO:0005886,plasma membrane|GO:0030017,sarcomere|GO:0031012,extracellular matrix	hsa01522 Endocrine resistance - Homo sapiens (human)|hsa04670 Leukocyte transendothelial migration - Homo sapiens (human)|hsa04912 GnRH signaling pathway - Homo sapiens (human)|hsa04915 Estrogen signaling pathway - Homo sapiens (human)|hsa04933 AGE-RAGE signaling pathway in diabetic complications - Homo sapiens (human)|hsa05200 Pathways in cancer - Homo sapiens (human)|hsa05205 Proteoglycans in c…	0.217244	0.224803	0.20637	0.217495	0.241963	0.143269	0.138828	0.139098	0.128859	0.13944	0.898985	4.69075	2.63912	0.000120483	0.00258579	0.0232481
DMR_192	14	61748000	61748574	574	9	cg15891218,cg10081469,cg04141707,cg24785368,cg00104086,cg19918763,cg11001769,cg01084740,cg01546243	TMEM30B	TSS200	Island=2,S_Shore=7	GO:0015917,aminophospholipid transport|GO:0070863,positive regulation of protein exit from endoplasmic reticulum	GO:0005515,protein binding|GO:0015247,aminophospholipid transmembrane transporter activity	GO:0005886,plasma membrane|GO:0016021,integral component of membrane		0.0557488	0.0402833	0.0611356	0.0461573	0.0556668	0.117481	0.12578	0.0767739	0.166871	0.172968	0.20933	0.839514	0.435708	0.000129089	0.00271871	0.0244431
DMR_193	17	170770	171257	487	9	cg21909751,cg05231332,cg17780867,cg20652871,cg01282504,cg15809575,cg12742645,cg18290190,cg01875057	RPH3AL	Body	Island=6,N_Shore=3	GO:0006886,intracellular protein transport|GO:0006887,exocytosis|GO:0017158,regulation of calcium ion-dependent exocytosis|GO:0042493,response to drug|GO:0042593,glucose homeostasis|GO:0045744,negative regulation of G-protein coupled receptor protein signaling pathway|GO:0050714,positive regulation of protein secretion	GO:0005509,calcium ion binding|GO:0005515,protein binding|GO:0005544,calcium-dependent phospholipid binding|GO:0008092,cytoskeletal protein binding|GO:0017137,Rab GTPase binding|GO:0030274,LIM domain binding	GO:0005737,cytoplasm|GO:0005886,plasma membrane|GO:0030658,transport vesicle membrane|GO:0030667,secretory granule membrane		0.522346	0.524301	0.520353	0.475027	0.488176	0.748889	0.725809	0.725851	0.743079	0.678745	0.502033	0.94881	0.680448	0.000129089	0.00271871	0.0244431
DMR_194	5	169780174	169780916	742	9	cg16335868,cg23864089,cg26947766,cg23604212,cg23388881,cg24615189,cg22464105,cg26513304,cg10608615	KCNIP1	TSS1500	opensea=9	GO:0061337,cardiac conduction|GO:0065009,regulation of molecular function|GO:0071805,potassium ion transmembrane transport|GO:1901379,regulation of potassium ion transmembrane transport	GO:0005244,voltage-gated ion channel activity|GO:0005267,potassium channel activity|GO:0005509,calcium ion binding|GO:0005515,protein binding|GO:0015459,potassium channel regulator activity	GO:0005737,cytoplasm|GO:0005886,plasma membrane|GO:0008076,voltage-gated potassium channel complex|GO:0030425,dendrite|GO:0031234,extrinsic component of cytoplasmic side of plasma membrane		0.420045	0.40428	0.385647	0.462552	0.410782	0.176629	0.22843	0.149259	0.243303	0.262442	1.70442	4.15823	2.27006	0.000129089	0.00271871	0.0244431
DMR_195	1	236557165	236557758	593	8	cg26742280,cg09809672,cg11451379,cg16240480,cg03323911,cg18964582,cg07497042,cg04031361	EDARADD	TSS1500	N_Shore=8	GO:0007275,multicellular organism development|GO:0030154,cell differentiation|GO:0033209,tumor necrosis factor-mediated signaling pathway	GO:0005515,protein binding	GO:0005829,cytosol		0.625019	0.661032	0.641582	0.651712	0.690337	0.504711	0.457242	0.465671	0.541723	0.531548	1.03492	2.25402	1.49746	0.000146301	0.00284214	0.0255529
DMR_196	8	110655713	110656442	729	8	cg20876538,cg23122263,cg02386604,cg02703731,cg25834419,cg23324537,cg13536222,cg25601086	SYBU,GOLSYN	TSS1500	N_Shore=8	GO:0019896,axonal transport of mitochondrion|GO:0035774,positive regulation of insulin secretion involved in cellular response to glucose stimulus|GO:0060025,regulation of synaptic activity|GO:0060074,synapse maturation|GO:1990048,anterograde neuronal dense core vesicle transport,	GO:0005515,protein binding|GO:0008017,microtubule binding|GO:0017075,syntaxin-1 binding|GO:0019894,kinesin binding,	GO:0000139,Golgi membrane|GO:0005874,microtubule|GO:0016021,integral component of membrane|GO:0031410,cytoplasmic vesicle|GO:0031982,vesicle|GO:0043231,intracellular membrane-bounded organelle|GO:0097433,dense body|GO:1904115,axon cytoplasm,		0.0334707	0.0320071	0.0422744	0.0300744	0.0413403	0.0852812	0.0811564	0.0596392	0.112987	0.126736	0.185665	0.880585	0.4143	0.000146301	0.00284214	0.0255529
DMR_197	12	25801455	25801945	490	8	cg01691592,cg13211181,cg18457264,cg03681383,cg23979954,cg16133681,cg26054782,cg10162403	LMNTD1,IFLTD1	TSS1500	opensea=8	GO:0008283,cell proliferation,	GO:0005198,structural molecule activity,	GO:0005635,nuclear envelope|GO:0005737,cytoplasm|GO:0005882,intermediate filament,		0.0535805	0.0412266	0.065667	0.0620577	0.0880329	0.122731	0.112831	0.0692822	0.207184	0.245345	0.246695	0.716522	0.379661	0.000146301	0.00284214	0.0255529
DMR_198	2	74776569	74776845	276	7	cg06584891,cg01646897,cg20914725,cg00644497,cg08304864,cg03663721,cg04985290	LOXL3	TSS200	Island=7	GO:0001837,epithelial to mesenchymal transition|GO:0006898,receptor-mediated endocytosis|GO:0006954,inflammatory response|GO:0018057,peptidyl-lysine oxidation|GO:0021510,spinal cord development|GO:0030324,lung development|GO:0045892,negative regulation of transcription, DNA-templated|GO:0060021,palate development|GO:0061053,somite development|GO:1905590,fibronectin fibril organization|GO:2000329,…	GO:0001968,fibronectin binding|GO:0004720,protein-lysine 6-oxidase activity|GO:0004720,protein-lysine 6-oxidase activity|GO:0005044,scavenger receptor activity|GO:0005507,copper ion binding|GO:0005515,protein binding	GO:0005576,extracellular region|GO:0005615,extracellular space|GO:0005634,nucleus|GO:0005634,nucleus|GO:0005737,cytoplasm|GO:0016020,membrane		0.0795656	0.0756258	0.079446	0.0813202	0.108715	0.203831	0.154628	0.209082	0.196324	0.226835	0.341656	0.797235	0.455854	0.000146301	0.00284214	0.0255529
DMR_199	11	120434880	120435056	176	7	cg21893358,cg25376962,cg02316596,cg27517999,cg00978634,cg07976064,cg10514733	,GRIK4	TSS1500	Island=7	,GO:0006810,transport|GO:0007215,glutamate receptor signaling pathway|GO:0007268,chemical synaptic transmission|GO:0035235,ionotropic glutamate receptor signaling pathway|GO:0035725,sodium ion transmembrane transport|GO:0060079,excitatory postsynaptic potential|GO:0071805,potassium ion transmembrane transport	,GO:0005234,extracellularly glutamate-gated ion channel activity|GO:0015276,ligand-gated ion channel activity|GO:0015277,kainate selective glutamate receptor activity	,GO:0005886,plasma membrane|GO:0005887,integral component of plasma membrane|GO:0030054,cell junction|GO:0032983,kainate selective glutamate receptor complex|GO:0042734,presynaptic membrane|GO:0045211,postsynaptic membrane	,hsa04080 Neuroactive ligand-receptor interaction - Homo sapiens (human)|hsa04724 Glutamatergic synapse - Homo sapiens (human)	0.145329	0.0876286	0.141865	0.121396	0.173638	0.364834	0.281574	0.247499	0.282602	0.269314	0.316141	0.574422	0.432838	0.000146301	0.00284214	0.0255529
DMR_200	9	112887565	112887903	338	7	cg12732899,cg21171115,cg05528187,cg09727611,cg08994526,cg10127822,cg05213092	AKAP2	TSS1500	opensea=7					0.0999824	0.0718798	0.131781	0.0841383	0.11252	0.191282	0.196205	0.128777	0.284556	0.311464	0.309421	0.725928	0.410347	0.000146301	0.00284214	0.0255529
DMR_201	3	161090648	161091175	527	6	cg16845623,cg18919097,cg20481171,cg22035566,cg18446193,cg04691961	C3orf57,SPTSSB	TSS1500	Island=1,S_Shore=5	,GO:0007029,endoplasmic reticulum organization|GO:0030148,sphingolipid biosynthetic process|GO:0046513,ceramide biosynthetic process|GO:1904220,regulation of serine C-palmitoyltransferase activity	,GO:0004758,serine C-palmitoyltransferase activity|GO:0004758,serine C-palmitoyltransferase activity|GO:0005515,protein binding	,GO:0005789,endoplasmic reticulum membrane|GO:0016021,integral component of membrane|GO:0017059,serine C-palmitoyltransferase complex		0.204318	0.20668	0.21121	0.212487	0.216237	0.305709	0.282767	0.269713	0.290149	0.267211	0.368922	1.00725	0.58924	0.000120483	0.00258579	0.0232481
DMR_202	8	17767750	17768115	365	6	cg02573329,cg11340351,cg12539724,cg10217159,cg15635524,cg19386147		IGR	opensea=6					0.821817	0.852662	0.883827	0.878407	0.926325	0.735316	0.610619	0.627447	0.784031	0.841784	1.06887	1.4015	1.22116	0.000146301	0.00284214	0.0255529
DMR_203	17	77043815	77044488	673	6	cg05837235,cg24917359,cg17015522,cg10763508,cg03121291,cg13669307	C1QTNF1	3'UTR	Island=6	GO:0007204,positive regulation of cytosolic calcium ion concentration|GO:0010544,negative regulation of platelet activation|GO:0010628,positive regulation of gene expression|GO:0010906,regulation of glucose metabolic process|GO:0043410,positive regulation of MAPK cascade|GO:0051260,protein homooligomerization|GO:0051897,positive regulation of protein kinase B signaling|GO:0070208,protein heterotr…	GO:0005515,protein binding|GO:0005518,collagen binding	GO:0005581,collagen trimer|GO:0005615,extracellular space|GO:0005634,nucleus|GO:0005829,cytosol|GO:0005887,integral component of plasma membrane		0.66514	0.748314	0.768777	0.699116	0.82807	0.501626	0.498912	0.445283	0.483577	0.647055	1.0168	2.21761	1.6472	0.000146301	0.00284214	0.0255529
DMR_204	5	134181226	134181484	258	5	cg08470180,cg19413392,cg25795871,cg00520708,cg06953768	C5orf24	TSS1500	Island=1,N_Shore=4		GO:0005515,protein binding			0.274899	0.331123	0.277046	0.324201	0.360848	0.142313	0.133602	0.117414	0.151487	0.163823	1.7272	3.19996	2.38053	0.000154907	0.00290902	0.0261541
DMR_205	11	125366421	125366590	169	5	cg26827653,cg05390307,cg23366166,cg19433435,cg08221207	FEZ1	TSS1500	S_Shore=5	GO:0006810,transport|GO:0007155,cell adhesion|GO:0007399,nervous system development|GO:0007411,axon guidance|GO:0010976,positive regulation of neuron projection development|GO:0021766,hippocampus development|GO:0030010,establishment of cell polarity|GO:0051654,establishment of mitochondrion localization|GO:0061881,positive regulation of anterograde axonal transport of mitochondrion|GO:0070584,mit…	GO:0005080,protein kinase C binding|GO:0005515,protein binding|GO:0043015,gamma-tubulin binding|GO:0047485,protein N-terminus binding	GO:0005739,mitochondrion|GO:0005794,Golgi apparatus|GO:0005813,centrosome|GO:0005874,microtubule|GO:0005886,plasma membrane|GO:0030424,axon|GO:0030425,dendrite|GO:0030426,growth cone|GO:0043025,neuronal cell body		0.0794336	0.0542145	0.101358	0.0585478	0.0879831	0.178412	0.17581	0.119341	0.231761	0.249228	0.257806	0.626423	0.416589	0.000154907	0.00290902	0.0261541
DMR_206	7	194278	194313	35	3	cg25480766,cg20966404,cg01874525	FAM20C	Body	S_Shore=3	GO:0006468,protein phosphorylation|GO:0030501,positive regulation of bone mineralization|GO:0031214,biomineral tissue development|GO:0036179,osteoclast maturation|GO:0040036,regulation of fibroblast growth factor receptor signaling pathway|GO:0043687,post-translational protein modification|GO:0044267,cellular protein metabolic process|GO:0045669,positive regulation of osteoblast differentiation|G…	GO:0004674,protein serine/threonine kinase activity|GO:0004674,protein serine/threonine kinase activity|GO:0005509,calcium ion binding|GO:0005515,protein binding|GO:0005524,ATP binding|GO:0030145,manganese ion binding	GO:0005615,extracellular space|GO:0005788,endoplasmic reticulum lumen|GO:0005794,Golgi apparatus|GO:0070062,extracellular exosome		0.0596637	0.0366936	0.0632227	0.052922	0.0765689	0.175184	0.174734	0.101442	0.273474	0.296052	0.189355	0.375456	0.268427	5.16356e-05	0.0014823	0.013327
DMR_207	11	18415641	18415742	101	4	cg02232751,cg19631472,cg15700009,cg19316551	LDHA	TSS1500	N_Shore=4	GO:0001666,response to hypoxia|GO:0006089,lactate metabolic process|GO:0006090,pyruvate metabolic process|GO:0006096,glycolytic process|GO:0007584,response to nutrient|GO:0009749,response to glucose|GO:0019674,NAD metabolic process|GO:0042493,response to drug|GO:0042542,response to hydrogen peroxide|GO:0043065,positive regulation of apoptotic process|GO:0043627,response to estrogen|GO:0048569,pos…	GO:0004459,L-lactate dehydrogenase activity|GO:0004459,L-lactate dehydrogenase activity|GO:0005515,protein binding|GO:0019900,kinase binding|GO:0042802,identical protein binding|GO:0045296,cadherin binding|GO:0051287,NAD binding	GO:0005634,nucleus|GO:0005829,cytosol|GO:0016020,membrane|GO:0070062,extracellular exosome	hsa00010 Glycolysis / Gluconeogenesis - Homo sapiens (human)|hsa00270 Cysteine and methionine metabolism - Homo sapiens (human)|hsa00620 Pyruvate metabolism - Homo sapiens (human)|hsa00640 Propanoate metabolism - Homo sapiens (human)|hsa01100 Metabolic pathways - Homo sapiens (human)|hsa04066 HIF-1 signaling pathway - Homo sapiens (human)|hsa04922 Glucagon signaling pathway - Homo sapiens (human)…	0.0196562	0.0139122	0.0279648	0.0143856	0.0199659	0.0535379	0.0521253	0.0342137	0.0930576	0.0917355	0.247963	0.37432	0.311258	0.000137695	0.0028081	0.0252468
DMR_208	5	145215445	145215784	339	4	cg12470775,cg09546802,cg11609571,cg06872887	PRELID2	TSS1500	S_Shore=4	GO:0015914,phospholipid transport	GO:1990050,phosphatidic acid transporter activity	GO:0005758,mitochondrial intermembrane space		0.208777	0.220175	0.229025	0.241324	0.283849	0.383042	0.325508	0.37101	0.381726	0.420243	0.331961	0.736801	0.544803	0.000137695	0.0028081	0.0252468
DMR_209	1	214169817	214169912	95	4	cg00346205,cg17880661,cg16382030,cg21753180	PROX1	5'UTR	opensea=4	GO:0000122,negative regulation of transcription from RNA polymerase II promoter|GO:0001709,cell fate determination|GO:0001822,kidney development|GO:0001889,liver development|GO:0001938,positive regulation of endothelial cell proliferation|GO:0001946,lymphangiogenesis|GO:0002088,lens development in camera-type eye|GO:0002194,hepatocyte cell migration|GO:0006351,transcription, DNA-templated|GO:0007…	GO:0001046,core promoter sequence-specific DNA binding|GO:0001078,transcriptional repressor activity, RNA polymerase II proximal promoter sequence-specific DNA binding|GO:0003677,DNA binding|GO:0003700,DNA binding transcription factor activity|GO:0003705,transcription factor activity, RNA polymerase II distal enhancer sequence-specific binding|GO:0003714,transcription corepressor activity|GO:0005…	GO:0005634,nucleus|GO:0005634,nucleus|GO:0005737,cytoplasm		0.737165	0.767571	0.800585	0.787989	0.824552	0.496261	0.515943	0.410999	0.6587	0.699766	1.25565	1.70601	1.43653	0.000137695	0.0028081	0.0252468
DMR_210	9	4666862	4667099	237	4	cg09519758,cg08523673,cg07557063,cg14021777	SPATA6L	TSS1500	opensea=2,S_Shelf=2					0.0534914	0.0374009	0.066325	0.050121	0.0624635	0.125022	0.123846	0.0775583	0.20042	0.203376	0.226047	0.679321	0.407365	0.000146301	0.00284214	0.0255529
DMR_211	10	48439368	48439452	84	4	cg14588178,cg00414835,cg15179825,cg12014008	GDF10	TSS1500	S_Shore=4	GO:0001501,skeletal system development|GO:0001649,osteoblast differentiation|GO:0007179,transforming growth factor beta receptor signaling pathway|GO:0010469,regulation of receptor activity|GO:0010862,positive regulation of pathway-restricted SMAD protein phosphorylation|GO:0010862,positive regulation of pathway-restricted SMAD protein phosphorylation|GO:0030509,BMP signaling pathway|GO:0042981,r…	GO:0005125,cytokine activity|GO:0005160,transforming growth factor beta receptor binding|GO:0008083,growth factor activity	GO:0005615,extracellular space|GO:0031012,extracellular matrix		0.0662089	0.0510538	0.0783005	0.0665173	0.0633344	0.164894	0.175045	0.121014	0.211181	0.206646	0.250992	0.548359	0.406291	0.000154907	0.00290902	0.0261541
DMR_212	5	139089274	139089846	572	4	cg14844341,cg06221393,cg24030507,cg22642485		IGR	Island=4					0.387504	0.415364	0.37499	0.367656	0.490637	0.249283	0.190141	0.24087	0.238916	0.276917	1.31819	3.47783	2.35868	0.000154907	0.00290902	0.0261541
DMR_213	8	95274845	95274933	88	3	cg22885024,cg18603700,cg07306755	GEM	TSS1500	S_Shore=3	GO:0000278,mitotic cell cycle|GO:0006955,immune response|GO:0007165,signal transduction|GO:0007166,cell surface receptor signaling pathway|GO:0051276,chromosome organization|GO:0051310,metaphase plate congression|GO:1901842,negative regulation of high voltage-gated calcium channel activity	GO:0000287,magnesium ion binding|GO:0003924,GTPase activity|GO:0005515,protein binding|GO:0005516,calmodulin binding|GO:0005525,GTP binding|GO:0019003,GDP binding	GO:0005634,nucleus|GO:0009898,cytoplasmic side of plasma membrane|GO:0030496,midbody|GO:0051233,spindle midzone|GO:0072686,mitotic spindle		0.0568594	0.0486315	0.093198	0.0555886	0.0811896	0.212077	0.183705	0.148878	0.28578	0.307537	0.290539	0.306629	0.296147	5.16356e-05	0.0014823	0.013327
DMR_214	2	152146702	152146944	242	3	cg19071452,cg03760265,cg22664064	NMI	TSS1500	S_Shore=3	GO:0006366,transcription from RNA polymerase II promoter|GO:0006954,inflammatory response|GO:0007259,JAK-STAT cascade|GO:0045355,negative regulation of interferon-alpha biosynthetic process|GO:0045358,negative regulation of interferon-beta biosynthetic process|GO:0045824,negative regulation of innate immune response|GO:0060333,interferon-gamma-mediated signaling pathway|GO:1902524,positive regula…	GO:0003712,transcription cofactor activity|GO:0005515,protein binding|GO:0042802,identical protein binding	GO:0005654,nucleoplasm|GO:0005737,cytoplasm|GO:0005829,cytosol		0.201133	0.197329	0.183622	0.237211	0.263273	0.065048	0.0629542	0.0348869	0.0653923	0.0877071	1.27119	3.92498	2.63421	5.16356e-05	0.0014823	0.013327
DMR_215	13	110917645	110918122	477	3	cg05029456,cg11241032,cg16436782	COL4A1	Body	N_Shore=3	GO:0001569,branching involved in blood vessel morphogenesis|GO:0007420,brain development|GO:0007528,neuromuscular junction development|GO:0030198,extracellular matrix organization|GO:0030574,collagen catabolic process|GO:0030855,epithelial cell differentiation|GO:0038063,collagen-activated tyrosine kinase receptor signaling pathway|GO:0048514,blood vessel morphogenesis|GO:0061304,retinal blood ve…	GO:0005201,extracellular matrix structural constituent|GO:0005515,protein binding|GO:0030023,extracellular matrix constituent conferring elasticity|GO:0048407,platelet-derived growth factor binding	GO:0005576,extracellular region|GO:0005576,extracellular region|GO:0005587,collagen type IV trimer|GO:0005604,basement membrane|GO:0005615,extracellular space|GO:0005788,endoplasmic reticulum lumen|GO:0031012,extracellular matrix|GO:0031012,extracellular matrix	hsa04151 PI3K-Akt signaling pathway - Homo sapiens (human)|hsa04510 Focal adhesion - Homo sapiens (human)|hsa04512 ECM-receptor interaction - Homo sapiens (human)|hsa04933 AGE-RAGE signaling pathway in diabetic complications - Homo sapiens (human)|hsa04974 Protein digestion and absorption - Homo sapiens (human)|hsa05146 Amoebiasis - Homo sapiens (human)|hsa05200 Pathways in cancer - Homo sapiens …	0.933856	0.962626	0.936861	0.957144	0.958134	0.845779	0.850171	0.878468	0.758969	0.818853	1.09283	1.2225	1.1464	5.16356e-05	0.0014823	0.013327
DMR_216	3	50303757	50304049	292	3	cg20116935,cg13209298,cg07580475	SEMA3B	TSS1500	opensea=3	GO:0007267,cell-cell signaling|GO:0007411,axon guidance|GO:0050919,negative chemotaxis	GO:0038191,neuropilin binding	GO:0005615,extracellular space|GO:0005783,endoplasmic reticulum|GO:0070062,extracellular exosome	hsa04360 Axon guidance - Homo sapiens (human)	0.289969	0.291458	0.349079	0.303883	0.368644	0.539035	0.4734	0.465999	0.51321	0.584124	0.26363	0.843952	0.474611	5.16356e-05	0.0014823	0.013327
DMR_217	10	79398415	79398475	60	3	cg15013463,cg26064264,cg09512236	KCNMA1	TSS1500	Island=3	GO:0001666,response to hypoxia|GO:0006813,potassium ion transport|GO:0006970,response to osmotic stress|GO:0030007,cellular potassium ion homeostasis|GO:0034465,response to carbon monoxide|GO:0034465,response to carbon monoxide|GO:0034765,regulation of ion transmembrane transport|GO:0042391,regulation of membrane potential|GO:0043065,positive regulation of apoptotic process|GO:0045794,negative re…	GO:0003779,actin binding|GO:0005249,voltage-gated potassium channel activity|GO:0005515,protein binding|GO:0015269,calcium-activated potassium channel activity|GO:0046872,metal ion binding|GO:0060072,large conductance calcium-activated potassium channel activity|GO:0060072,large conductance calcium-activated potassium channel activity	GO:0005886,plasma membrane|GO:0005901,caveola|GO:0008076,voltage-gated potassium channel complex|GO:0016021,integral component of membrane|GO:0016324,apical plasma membrane|GO:0070062,extracellular exosome	hsa04022 cGMP-PKG signaling pathway - Homo sapiens (human)|hsa04270 Vascular smooth muscle contraction - Homo sapiens (human)|hsa04911 Insulin secretion - Homo sapiens (human)|hsa04924 Renin secretion - Homo sapiens (human)|hsa04970 Salivary secretion - Homo sapiens (human)|hsa04972 Pancreatic secretion - Homo sapiens (human)	0.245271	0.281917	0.283425	0.245925	0.255692	0.0848306	0.0865598	0.0750657	0.0919687	0.0846893	2.26739	3.65201	3.01006	5.16356e-05	0.0014823	0.013327
DMR_218	6	101846603	101847656	1053	18	cg17881572,cg27451362,cg22851944,cg16009558,cg01737026,cg15081698,cg27074174,cg05942459,cg14082127,cg13080565,cg24301620,cg21635870,cg10591607,cg18193094,cg24753760,cg06247406,cg26316946,cg22541254	GRIK2	TSS1500	Island=11,N_Shore=3,S_Shore=4	GO:0001662,behavioral fear response|GO:0006810,transport|GO:0006874,cellular calcium ion homeostasis|GO:0006886,intracellular protein transport|GO:0007215,glutamate receptor signaling pathway|GO:0007268,chemical synaptic transmission|GO:0019228,neuronal action potential|GO:0035235,ionotropic glutamate receptor signaling pathway|GO:0035249,synaptic transmission, glutamatergic|GO:0035725,sodium ion…	GO:0005234,extracellularly glutamate-gated ion channel activity|GO:0015276,ligand-gated ion channel activity|GO:0015277,kainate selective glutamate receptor activity|GO:0030165,PDZ domain binding|GO:0031624,ubiquitin conjugating enzyme binding|GO:0031625,ubiquitin protein ligase binding|GO:0042803,protein homodimerization activity	GO:0005886,plasma membrane|GO:0005887,integral component of plasma membrane|GO:0014069,postsynaptic density|GO:0030054,cell junction|GO:0032839,dendrite cytoplasm|GO:0032983,kainate selective glutamate receptor complex|GO:0042734,presynaptic membrane|GO:0043195,terminal bouton|GO:0043204,perikaryon|GO:0045211,postsynaptic membrane	hsa04080 Neuroactive ligand-receptor interaction - Homo sapiens (human)|hsa04724 Glutamatergic synapse - Homo sapiens (human)	0.177567	0.4543	0.238074	0.24129	0.281672	0.128369	0.211059	0.108204	0.179593	0.173999	1.33733	3.31816	1.84145	6.88474e-05	0.00183607	0.0165075
DMR_219	10	77542302	77542585	283	9	cg25414165,cg06103397,cg06487870,cg14459668,cg03641066,cg03448754,cg14567917,cg23823660,cg17238009	C10orf11	TSS1500	opensea=9					0.142715	0.120536	0.194757	0.12072	0.173054	0.267283	0.230262	0.186605	0.34121	0.349259	0.217267	0.94563	0.440615	0.000137695	0.0028081	0.0252468
DMR_220	16	89387014	89387805	791	9	cg08311935,cg09420319,cg11867368,cg21754178,cg27300957,cg00376537,cg27247807,cg27600435,cg07708487	ANKRD11,LOC100287036	TSS200	opensea=9	GO:0001701,in utero embryonic development|GO:0001894,tissue homeostasis|GO:0035264,multicellular organism growth|GO:0042475,odontogenesis of dentin-containing tooth|GO:0048705,skeletal system morphogenesis|GO:0060325,face morphogenesis|GO:0060348,bone development,		GO:0005634,nucleus|GO:0005654,nucleoplasm|GO:0005829,cytosol|GO:0005886,plasma membrane,		0.199469	0.150096	0.209703	0.171609	0.183792	0.346699	0.384768	0.313308	0.36476	0.406629	0.265984	0.690255	0.466757	0.000137695	0.0028081	0.0252468
DMR_221	16	29757318	29757565	247	8	cg15853475,cg11615447,cg09897970,cg09638208,cg02319067,cg03750478,cg26285698,cg23093496	C16orf54	TSS1500	opensea=8			GO:0016021,integral component of membrane		0.677726	0.73708	0.696142	0.738599	0.75865	0.573471	0.482708	0.468198	0.561793	0.51196	1.31298	1.52744	1.39411	0.000163513	0.00302029	0.0271546
DMR_222	13	102104707	102105129	422	7	cg03386869,cg10164367,cg22070156,cg16293118,cg05138203,cg15209376,cg10243348	ITGBL1	TSS1500	N_Shore=7	GO:0007155,cell adhesion		GO:0005615,extracellular space|GO:0005886,plasma membrane		0.0801791	0.0542733	0.0990795	0.0631012	0.081302	0.184145	0.187824	0.116888	0.28146	0.291029	0.205399	0.723228	0.337026	0.000163513	0.00302029	0.0271546
DMR_223	15	75941073	75941576	503	6	cg27635271,cg01968002,cg15545086,cg03836261,cg07362977,cg21970950	SNX33	TSS1500	S_Shore=6	GO:0000281,mitotic cytokinesis|GO:0006886,intracellular protein transport|GO:0006897,endocytosis|GO:0007032,endosome organization|GO:0016197,endosomal transport|GO:0017038,protein import|GO:0036089,cleavage furrow formation|GO:0044351,macropinocytosis|GO:0045806,negative regulation of endocytosis|GO:0051044,positive regulation of membrane protein ectodomain proteolysis|GO:0097320,plasma membrane …	GO:0005515,protein binding|GO:0035091,phosphatidylinositol binding|GO:0042802,identical protein binding	GO:0005829,cytosol|GO:0016020,membrane|GO:0019898,extrinsic component of membrane|GO:0030659,cytoplasmic vesicle membrane|GO:0031410,cytoplasmic vesicle		0.0637767	0.0489444	0.0818047	0.0598017	0.0847776	0.15194	0.139217	0.0892363	0.223846	0.234312	0.281387	0.565376	0.395968	0.000154907	0.00290902	0.0261541
DMR_224	5	132201234	132201652	418	6	cg17317391,cg00344527,cg12532266,cg12304215,cg17446142,cg11300333	GDF9	TSS1500	N_Shore=6	GO:0001555,oocyte growth|GO:0007179,transforming growth factor beta receptor signaling pathway|GO:0007292,female gamete generation|GO:0008284,positive regulation of cell proliferation|GO:0010469,regulation of receptor activity|GO:0010862,positive regulation of pathway-restricted SMAD protein phosphorylation|GO:0030308,negative regulation of cell growth|GO:0030509,BMP signaling pathway|GO:0042981,…	GO:0005125,cytokine activity|GO:0005160,transforming growth factor beta receptor binding|GO:0008083,growth factor activity	GO:0005615,extracellular space|GO:0005737,cytoplasm	hsa04913 Ovarian steroidogenesis - Homo sapiens (human)	0.62761	0.60158	0.580504	0.669282	0.628274	0.740239	0.724097	0.770523	0.776595	0.805987	0.644903	0.984072	0.782365	0.000163513	0.00302029	0.0271546
DMR_225	6	152126441	152126938	497	6	cg07746998,cg20893956,cg24764793,cg17264271,cg01321962,cg21157690	ESR1	5'UTR	N_Shelf=4,N_Shore=2	GO:0000122,negative regulation of transcription from RNA polymerase II promoter|GO:0001547,antral ovarian follicle growth|GO:0002064,epithelial cell development|GO:0006338,chromatin remodeling|GO:0006351,transcription, DNA-templated|GO:0006355,regulation of transcription, DNA-templated|GO:0006357,regulation of transcription from RNA polymerase II promoter|GO:0006366,transcription from RNA polymer…	GO:0000978,RNA polymerase II proximal promoter sequence-specific DNA binding|GO:0001046,core promoter sequence-specific DNA binding|GO:0001077,transcriptional activator activity, RNA polymerase II proximal promoter sequence-specific DNA binding|GO:0001093,TFIIB-class transcription factor binding|GO:0001223,transcription coactivator binding|GO:0003682,chromatin binding|GO:0003700,DNA binding trans…	GO:0000790,nuclear chromatin|GO:0005634,nucleus|GO:0005654,nucleoplasm|GO:0005737,cytoplasm|GO:0005794,Golgi apparatus|GO:0005886,plasma membrane|GO:0016020,membrane|GO:0016021,integral component of membrane|GO:0035327,transcriptionally active chromatin|GO:0043234,protein complex|GO:0097550,transcriptional preinitiation complex	hsa01522 Endocrine resistance - Homo sapiens (human)|hsa04915 Estrogen signaling pathway - Homo sapiens (human)|hsa04917 Prolactin signaling pathway - Homo sapiens (human)|hsa04919 Thyroid hormone signaling pathway - Homo sapiens (human)|hsa04961 Endocrine and other factor-regulated calcium reabsorption - Homo sapiens (human)|hsa05205 Proteoglycans in cancer - Homo sapiens (human)|hsa05224 Breast…	0.106432	0.0982621	0.126388	0.122792	0.153954	0.140543	0.142307	0.0881372	0.219483	0.251776	0.201825	1.98009	0.632301	0.000172119	0.00309059	0.0277866
DMR_226	5	501863	502074	211	4	cg12833872,cg22572362,cg13340126,cg19301897	SLC9A3	Body	Island=4	GO:0006811,ion transport|GO:0051453,regulation of intracellular pH|GO:0071805,potassium ion transmembrane transport|GO:0098719,sodium ion import across plasma membrane|GO:1902600,hydrogen ion transmembrane transport	GO:0005515,protein binding|GO:0015385,sodium:proton antiporter activity|GO:0015385,sodium:proton antiporter activity|GO:0015385,sodium:proton antiporter activity|GO:0015386,potassium:proton antiporter activity|GO:0030165,PDZ domain binding	GO:0005886,plasma membrane|GO:0005886,plasma membrane|GO:0005886,plasma membrane|GO:0005903,brush border|GO:0009986,cell surface|GO:0016021,integral component of membrane|GO:0016324,apical plasma membrane|GO:0016324,apical plasma membrane|GO:0031526,brush border membrane|GO:0031526,brush border membrane|GO:0070062,extracellular exosome	hsa04964 Proximal tubule bicarbonate reclamation - Homo sapiens (human)|hsa04974 Protein digestion and absorption - Homo sapiens (human)|hsa04976 Bile secretion - Homo sapiens (human)|hsa04978 Mineral absorption - Homo sapiens (human)	0.0967258	0.0438688	0.0836359	0.047686	0.0636029	0.164192	0.130275	0.149469	0.208987	0.174252	0.353601	0.839996	0.506509	0.000180724	0.00321947	0.0289453
DMR_227	3	183543862	183544171	309	3	cg06453439,cg05902884,cg15787985	MAP6D1	TSS1500	S_Shore=3	GO:0000226,microtubule cytoskeleton organization|GO:0007026,negative regulation of microtubule depolymerization|GO:0018009,N-terminal peptidyl-L-cysteine N-palmitoylation|GO:0032418,lysosome localization|GO:0048813,dendrite morphogenesis	GO:0005516,calmodulin binding|GO:0008017,microtubule binding	GO:0005798,Golgi-associated vesicle|GO:0005801,cis-Golgi network|GO:0005874,microtubule		0.320743	0.269206	0.336422	0.344361	0.4102	0.556262	0.440923	0.448663	0.571661	0.543951	0.444282	0.904095	0.672885	6.88474e-05	0.00183607	0.0165075
DMR_228	7	47622177	47622279	102	3	cg18723295,cg18990560,cg20128809	TNS3	TSS1500	S_Shore=3	GO:0008284,positive regulation of cell proliferation|GO:0016477,cell migration|GO:0048286,lung alveolus development	GO:0005515,protein binding	GO:0005829,cytosol|GO:0005829,cytosol|GO:0005925,focal adhesion		0.706474	0.834304	0.768267	0.735047	0.787551	0.488824	0.619366	0.414511	0.447436	0.527852	1.40676	1.64965	1.54757	6.88474e-05	0.00183607	0.0165075
DMR_229	12	52403817	52404880	1063	12	cg19374752,cg06611426,cg21633461,cg20924966,cg15430661,cg14242936,cg12900807,cg13797075,cg10369363,cg13030296,cg09849237,cg07384107	GRASP	Body	N_Shelf=1,S_Shelf=11	GO:0007165,signal transduction|GO:0008104,protein localization	GO:0030165,PDZ domain binding|GO:0030306,ADP-ribosylation factor binding|GO:0042802,identical protein binding	GO:0005886,plasma membrane|GO:0030054,cell junction|GO:0045211,postsynaptic membrane|GO:0048471,perinuclear region of cytoplasm		0.4637	0.530369	0.518705	0.48304	0.528898	0.299879	0.361552	0.272908	0.324611	0.374843	1.17589	3.06613	1.94607	9.46652e-05	0.00213328	0.0191797
DMR_230	10	104535020	104536121	1101	12	cg10555609,cg15227982,cg00037952,cg26640901,cg23247968,cg14939082,cg17894755,cg27517345,cg03161190,cg09405083,cg14015502,cg17740322	WBP1L,C10orf26	TSS1500	opensea=12		GO:0005515,protein binding,	GO:0016021,integral component of membrane,		0.0329803	0.030082	0.0397395	0.0332219	0.0428439	0.0952829	0.0773503	0.0751452	0.119364	0.129571	0.202161	0.647347	0.420238	9.46652e-05	0.00213328	0.0191797
DMR_231	6	33128903	33129106	203	10	cg04804814,cg21632964,cg09347430,cg22209918,cg07715777,cg05146888,cg26290219,cg16604233,cg20437276,cg03731828		IGR	N_Shore=10					0.0632977	0.0454548	0.0746196	0.0553246	0.0711025	0.135479	0.139011	0.100343	0.195115	0.225805	0.226676	0.704232	0.410202	0.000103271	0.00225943	0.0203139
DMR_232	8	101348359	101349044	685	10	cg14021398,cg12182643,cg19235198,cg10334750,cg27190410,cg23451443,cg16450097,cg08096750,cg24450239,cg16149401	RNF19A,	TSS1500	opensea=10	GO:0000209,protein polyubiquitination|GO:0000209,protein polyubiquitination|GO:0000226,microtubule cytoskeleton organization|GO:0032436,positive regulation of proteasomal ubiquitin-dependent protein catabolic process|GO:0042787,protein ubiquitination involved in ubiquitin-dependent protein catabolic process,	GO:0004842,ubiquitin-protein transferase activity|GO:0004842,ubiquitin-protein transferase activity|GO:0008134,transcription factor binding|GO:0031624,ubiquitin conjugating enzyme binding|GO:0046872,metal ion binding|GO:0061630,ubiquitin protein ligase activity,	GO:0000151,ubiquitin ligase complex|GO:0005737,cytoplasm|GO:0005813,centrosome|GO:0005829,cytosol|GO:0016021,integral component of membrane,		0.602184	0.662086	0.720787	0.655882	0.748252	0.495876	0.530753	0.285162	0.55725	0.566513	1.05238	2.08919	1.48962	0.000103271	0.00225943	0.0203139
DMR_233	1	151583925	151584257	332	3	cg12343563,cg00387445,cg26575164	SNX27	TSS1500	N_Shore=3	GO:0001770,establishment of natural killer cell polarity|GO:0006886,intracellular protein transport|GO:0007165,signal transduction|GO:0008333,endosome to lysosome transport|GO:0016197,endosomal transport|GO:1990126,retrograde transport, endosome to plasma membrane	GO:0005515,protein binding|GO:0032266,phosphatidylinositol-3-phosphate binding	GO:0001772,immunological synapse|GO:0005654,nucleoplasm|GO:0005768,endosome|GO:0005769,early endosome|GO:0005829,cytosol|GO:0030904,retromer complex|GO:0031901,early endosome membrane|GO:0071203,WASH complex		0.117071	0.152508	0.114032	0.151982	0.166968	0.0478639	0.0453265	0.0301747	0.0431141	0.0506526	0.754389	8.18295	4.32933	8.60593e-05	0.00198907	0.0178832
DMR_234	8	22421913	22423091	1178	12	cg04584206,cg05823917,cg27506533,cg22063065,cg23979472,cg24805258,cg04394254,cg10191684,cg07469555,cg15316206,cg07924703,cg19675778	SORBS3	TSS1500	Island=7,N_Shore=5	GO:0000122,negative regulation of transcription from RNA polymerase II promoter|GO:0006936,muscle contraction|GO:0007015,actin filament organization|GO:0007155,cell adhesion|GO:0031589,cell-substrate adhesion|GO:0043410,positive regulation of MAPK cascade|GO:0051495,positive regulation of cytoskeleton organization|GO:0051496,positive regulation of stress fiber assembly	GO:0005200,structural constituent of cytoskeleton|GO:0005515,protein binding|GO:0008134,transcription factor binding|GO:0017166,vinculin binding	GO:0005634,nucleus|GO:0005829,cytosol|GO:0005856,cytoskeleton|GO:0005925,focal adhesion|GO:0005925,focal adhesion		0.133759	0.121484	0.166772	0.137765	0.158519	0.273513	0.222941	0.183446	0.302171	0.2687	0.291344	0.895834	0.460791	0.000120483	0.00258579	0.0232481
DMR_235	3	11177986	11178798	812	9	cg23247337,cg13593758,cg08831077,cg12179658,cg25677394,cg08358800,cg27092248,cg26864526,cg06457736	HRH1	TSS1500	opensea=9	GO:0006954,inflammatory response|GO:0007186,G-protein coupled receptor signaling pathway|GO:0007186,G-protein coupled receptor signaling pathway|GO:0007200,phospholipase C-activating G-protein coupled receptor signaling pathway|GO:0007613,memory|GO:0008542,visual learning|GO:0019229,regulation of vasoconstriction|GO:0032962,positive regulation of inositol trisphosphate biosynthetic process|GO:004…	GO:0004930,G-protein coupled receptor activity|GO:0004969,histamine receptor activity	GO:0005829,cytosol|GO:0005886,plasma membrane|GO:0005886,plasma membrane|GO:0005887,integral component of plasma membrane	hsa04020 Calcium signaling pathway - Homo sapiens (human)|hsa04080 Neuroactive ligand-receptor interaction - Homo sapiens (human)|hsa04750 Inflammatory mediator regulation of TRP channels - Homo sapiens (human)	0.189369	0.167623	0.213821	0.182348	0.231228	0.21547	0.202223	0.142211	0.284911	0.337517	0.253541	1.63107	0.613713	0.000154907	0.00290902	0.0261541
DMR_236	6	30710949	30711863	914	24	cg19033654,cg08384314,cg12232308,cg10916998,cg27545367,cg04012931,cg13337949,cg03124636,cg13804182,cg20178172,cg08457178,cg17389738,cg09235583,cg14433074,cg08687386,cg08794940,cg18650716,cg05937873,cg05902624,cg16331823,cg02915939,cg04018991,cg26755097,cg16493531	IER3,FLOT1	TSS1500	Island=24	GO:0006915,apoptotic process|GO:0009653,anatomical structure morphogenesis|GO:0010941,regulation of cell death|GO:0014066,regulation of phosphatidylinositol 3-kinase signaling|GO:0043066,negative regulation of apoptotic process|GO:2001020,regulation of response to DNA damage stimulus,GO:0001765,membrane raft assembly|GO:0001819,positive regulation of cytokine production|GO:0001934,positive regula…	GO:0005515,protein binding,GO:0002020,protease binding|GO:0005515,protein binding|GO:0035255,ionotropic glutamate receptor binding|GO:0046982,protein heterodimerization activity	GO:0005634,nucleus|GO:0005829,cytosol|GO:0016021,integral component of membrane,GO:0001931,uropod|GO:0005765,lysosomal membrane|GO:0005768,endosome|GO:0005769,early endosome|GO:0005815,microtubule organizing center|GO:0005886,plasma membrane|GO:0005886,plasma membrane|GO:0005901,caveola|GO:0005911,cell-cell junction|GO:0005913,cell-cell adherens junction|GO:0005925,focal adhesion|GO:0008180,COP9 …	,hsa04910 Insulin signaling pathway - Homo sapiens (human)	0.0649073	0.126024	0.0864447	0.0978981	0.118808	0.0515891	0.0431333	0.029112	0.0700569	0.0556308	0.822178	2.9642	1.84491	8.60593e-05	0.00198907	0.0178832
DMR_237	6	33162218	33163689	1471	17	cg01771651,cg06215670,cg06370855,cg04966574,cg02915381,cg14263924,cg23456739,cg04770660,cg27428603,cg05324696,cg25472257,cg26987634,cg19809659,cg11930353,cg12776061,cg13784283,cg20198611	RXRB	3'UTR	S_Shelf=7,S_Shore=10	GO:0006367,transcription initiation from RNA polymerase II promoter|GO:0043401,steroid hormone mediated signaling pathway|GO:0045944,positive regulation of transcription from RNA polymerase II promoter|GO:0048384,retinoic acid receptor signaling pathway	GO:0000977,RNA polymerase II regulatory region sequence-specific DNA binding|GO:0001228,transcriptional activator activity, RNA polymerase II transcription regulatory region sequence-specific DNA binding|GO:0003700,DNA binding transcription factor activity|GO:0003707,steroid hormone receptor activity|GO:0003713,transcription coactivator activity|GO:0004879,nuclear receptor activity|GO:0004886,9-c…	GO:0005634,nucleus|GO:0005654,nucleoplasm	hsa03320 PPAR signaling pathway - Homo sapiens (human)|hsa04659 Th17 cell differentiation - Homo sapiens (human)|hsa04919 Thyroid hormone signaling pathway - Homo sapiens (human)|hsa04920 Adipocytokine signaling pathway - Homo sapiens (human)|hsa05200 Pathways in cancer - Homo sapiens (human)|hsa05202 Transcriptional misregulation in cancer - Homo sapiens (human)|hsa05216 Thyroid cancer - Homo sa…	0.563254	0.523456	0.56324	0.559364	0.576604	0.690821	0.658062	0.67508	0.693878	0.708719	0.344232	0.973672	0.772776	0.000103271	0.00225943	0.0203139
DMR_238	17	7757933	7759140	1207	16	cg00031013,cg03854722,cg03719978,cg01965560,cg15853812,cg21845633,cg23528037,cg23671708,cg02459416,cg17977470,cg02021641,cg17044356,cg06518763,cg06759255,cg21969795,cg23404101	KDM6B,TMEM88	TSS1500	Island=2,N_Shore=13,S_Shore=1	GO:0002437,inflammatory response to antigenic stimulus|GO:0006338,chromatin remodeling|GO:0014823,response to activity|GO:0021766,hippocampus development|GO:0045165,cell fate commitment|GO:0045446,endothelial cell differentiation|GO:0045944,positive regulation of transcription from RNA polymerase II promoter|GO:0048333,mesodermal cell differentiation|GO:0055007,cardiac muscle cell differentiation…	GO:0003682,chromatin binding|GO:0005515,protein binding|GO:0008013,beta-catenin binding|GO:0032452,histone demethylase activity|GO:0043565,sequence-specific DNA binding|GO:0046872,metal ion binding|GO:0051213,dioxygenase activity|GO:0071558,histone demethylase activity (H3-K27 specific)|GO:0071558,histone demethylase activity (H3-K27 specific),GO:0005515,protein binding|GO:0030165,PDZ domain bind…	GO:0005634,nucleus|GO:0005654,nucleoplasm,GO:0005829,cytosol|GO:0005886,plasma membrane|GO:0016021,integral component of membrane		0.375236	0.343613	0.377611	0.379502	0.416752	0.51578	0.483418	0.46878	0.540059	0.564504	0.452751	0.909147	0.698986	0.000103271	0.00225943	0.0203139
DMR_239	6	29595002	29595506	504	9	cg21100518,cg23732781,cg08093277,cg08862148,cg02014853,cg25729445,cg00594408,cg15385139,cg20997792	GABBR1	Body	Island=7,N_Shore=2	GO:0007186,G-protein coupled receptor signaling pathway|GO:0007193,adenylate cyclase-inhibiting G-protein coupled receptor signaling pathway|GO:0007194,negative regulation of adenylate cyclase activity|GO:0007214,gamma-aminobutyric acid signaling pathway	GO:0004965,G-protein coupled GABA receptor activity|GO:0004965,G-protein coupled GABA receptor activity|GO:0005515,protein binding	GO:0005576,extracellular region|GO:0005737,cytoplasm|GO:0005886,plasma membrane|GO:0005887,integral component of plasma membrane|GO:0030054,cell junction|GO:0030425,dendrite|GO:0038039,G-protein coupled receptor heterodimeric complex|GO:0042734,presynaptic membrane|GO:0045211,postsynaptic membrane	hsa04024 cAMP signaling pathway - Homo sapiens (human)|hsa04080 Neuroactive ligand-receptor interaction - Homo sapiens (human)|hsa04727 GABAergic synapse - Homo sapiens (human)|hsa04742 Taste transduction - Homo sapiens (human)|hsa04915 Estrogen signaling pathway - Homo sapiens (human)|hsa05032 Morphine addiction - Homo sapiens (human)	0.0631573	0.0506052	0.0829671	0.0626953	0.0805306	0.16868	0.154946	0.134413	0.172657	0.217448	0.210658	0.694827	0.477117	0.000163513	0.00302029	0.0271546
DMR_240	22	31643997	31644558	561	8	cg00520380,cg14703589,cg05977840,cg20742981,cg09727543,cg01283300,cg15504662,cg16491694	LIMK2	TSS1500	opensea=8	GO:0006468,protein phosphorylation|GO:0007283,spermatogenesis|GO:0016310,phosphorylation|GO:0035556,intracellular signal transduction	GO:0004674,protein serine/threonine kinase activity|GO:0004871,signal transducer activity|GO:0005515,protein binding|GO:0005524,ATP binding|GO:0046872,metal ion binding|GO:0046982,protein heterodimerization activity	GO:0005634,nucleus|GO:0005737,cytoplasm|GO:0005801,cis-Golgi network	hsa04360 Axon guidance - Homo sapiens (human)|hsa04666 Fc gamma R-mediated phagocytosis - Homo sapiens (human)|hsa04810 Regulation of actin cytoskeleton - Homo sapiens (human)	0.0676351	0.0586593	0.0932701	0.064748	0.0880854	0.176352	0.158283	0.107564	0.2074	0.213087	0.235826	0.593926	0.414039	0.00018933	0.00330741	0.029736
DMR_241	11	1769152	1769645	493	8	cg23598212,cg03934392,cg08966208,cg20272155,cg02916272,cg03846408,cg08269485,cg16934127	HCCA2	Body	Island=8					0.143735	0.0912992	0.149363	0.124177	0.134606	0.244524	0.271658	0.16721	0.360736	0.313627	0.23385	0.642953	0.428722	0.00018933	0.00330741	0.029736
DMR_242	17	8702369	8702896	527	8	cg24203800,cg18432414,cg18561560,cg18963365,cg07796220,cg05730038,cg11685316,cg04259560	MFSD6L	TSS1500	Island=6,S_Shore=2			GO:0016021,integral component of membrane		0.14971	0.112403	0.196656	0.112069	0.138042	0.276408	0.291699	0.222086	0.347788	0.338484	0.315981	0.695882	0.463068	0.000197936	0.003418	0.0307303
DMR_243	6	28543043	28543693	650	8	cg07031070,cg06280322,cg01254034,cg18214570,cg06217314,cg05927586,cg09589105,cg04113450	SCAND3	Body	opensea=8					0.954801	0.966551	0.962884	0.967658	0.970715	0.906267	0.909381	0.872618	0.925363	0.91916	1.01661	1.13587	1.0655	0.000197936	0.003418	0.0307303
DMR_244	5	180230767	180231194	427	7	cg11850468,cg04212021,cg20399011,cg21898046,cg01835695,cg07636650,cg11316131	MGAT1	TSS1500	S_Shore=7	GO:0001701,in utero embryonic development|GO:0005975,carbohydrate metabolic process|GO:0006049,UDP-N-acetylglucosamine catabolic process|GO:0006486,protein glycosylation	GO:0003827,alpha-1,3-mannosylglycoprotein 2-beta-N-acetylglucosaminyltransferase activity|GO:0008375,acetylglucosaminyltransferase activity|GO:0046872,metal ion binding	GO:0000139,Golgi membrane|GO:0016020,membrane|GO:0016021,integral component of membrane|GO:0070062,extracellular exosome|GO:1903561,extracellular vesicle	hsa00510 N-Glycan biosynthesis - Homo sapiens (human)|hsa01100 Metabolic pathways - Homo sapiens (human)	0.616544	0.668064	0.639154	0.675488	0.735814	0.578421	0.431602	0.488636	0.501141	0.496182	1.15037	1.62139	1.37158	0.000197936	0.003418	0.0307303
DMR_245	17	78161227	78161706	479	7	cg15910686,cg03130276,cg20571913,cg24206431,cg21336650,cg11447922,cg07107756	CARD14	TSS1500	N_Shelf=7	GO:0001934,positive regulation of protein phosphorylation|GO:0006915,apoptotic process|GO:0007250,activation of NF-kappaB-inducing kinase activity|GO:0033209,tumor necrosis factor-mediated signaling pathway|GO:0043066,negative regulation of apoptotic process|GO:0051092,positive regulation of NF-kappaB transcription factor activity	GO:0050700,CARD domain binding	GO:0005737,cytoplasm|GO:0005886,plasma membrane	hsa04064 NF-kappa B signaling pathway - Homo sapiens (human)	0.0794119	0.054335	0.106981	0.0634793	0.0987791	0.162696	0.1716	0.107957	0.256125	0.27544	0.300847	0.784861	0.4069	0.000215148	0.003673	0.0330229
DMR_246	16	57406257	57406511	254	6	cg20816757,cg22549797,cg26644853,cg20427865,cg04452432,cg11823443	CX3CL1	TSS200	opensea=6	GO:0002523,leukocyte migration involved in inflammatory response|GO:0002548,monocyte chemotaxis|GO:0006935,chemotaxis|GO:0006935,chemotaxis|GO:0006952,defense response|GO:0006955,immune response|GO:0007155,cell adhesion|GO:0007186,G-protein coupled receptor signaling pathway|GO:0010469,regulation of receptor activity|GO:0019221,cytokine-mediated signaling pathway|GO:0030336,negative regulation of…	GO:0005102,receptor binding|GO:0005178,integrin binding|GO:0005515,protein binding|GO:0008009,chemokine activity|GO:0008009,chemokine activity|GO:0031737,CX3C chemokine receptor binding|GO:0048020,CCR chemokine receptor binding	GO:0005576,extracellular region|GO:0005615,extracellular space|GO:0005886,plasma membrane|GO:0009986,cell surface|GO:0016021,integral component of membrane	hsa04060 Cytokine-cytokine receptor interaction - Homo sapiens (human)|hsa04062 Chemokine signaling pathway - Homo sapiens (human)|hsa04668 TNF signaling pathway - Homo sapiens (human)	0.0759006	0.0485034	0.102113	0.0600397	0.0890065	0.175594	0.179864	0.0979809	0.271161	0.283213	0.266174	0.417662	0.362598	0.000223754	0.00374017	0.0336268
DMR_247	7	114561850	114562063	213	5	cg16886175,cg10433965,cg10436410,cg14193908,cg05338976	MDFIC	TSS1500	N_Shore=5	GO:0006351,transcription, DNA-templated|GO:0007257,activation of JUN kinase activity|GO:0016032,viral process|GO:0030111,regulation of Wnt signaling pathway|GO:0042308,negative regulation of protein import into nucleus|GO:0045892,negative regulation of transcription, DNA-templated|GO:0045892,negative regulation of transcription, DNA-templated|GO:0045893,positive regulation of transcription, DNA-t…	GO:0005515,protein binding|GO:0008134,transcription factor binding|GO:0030332,cyclin binding|GO:0030957,Tat protein binding	GO:0005634,nucleus|GO:0005730,nucleolus|GO:0005737,cytoplasm		0.0717817	0.0555144	0.0934807	0.0782816	0.115064	0.126804	0.108032	0.0788287	0.184692	0.234641	0.229173	0.90553	0.422148	0.00023236	0.00374017	0.0336268
DMR_248	22	38669377	38669551	174	5	cg05565052,cg19403819,cg23052670,cg08373212,cg15406395	TMEM184B	TSS1500	S_Shore=5	GO:0006810,transport	GO:0005215,transporter activity	GO:0016021,integral component of membrane		0.03008	0.0217314	0.0388541	0.0266729	0.0381686	0.0755436	0.0613255	0.0541758	0.112584	0.132644	0.31048	1.12379	0.492601	0.00023236	0.00374017	0.0336268
DMR_249	15	90727363	90727886	523	5	cg06008511,cg14120571,cg26955540,cg26312071,cg25913761	SEMA4B	TSS1500	Island=1,N_Shore=4	GO:0007399,nervous system development|GO:0030154,cell differentiation|GO:0050919,negative chemotaxis	GO:0038191,neuropilin binding	GO:0005615,extracellular space|GO:0016021,integral component of membrane	hsa04360 Axon guidance - Homo sapiens (human)	0.0761514	0.0631205	0.0930466	0.0680912	0.100742	0.139339	0.1283	0.0895752	0.164067	0.20059	0.207575	0.890998	0.433171	0.00023236	0.00374017	0.0336268
DMR_250	6	32037632	32038230	598	12	cg16416464,cg25772658,cg03822479,cg27073361,cg24884217,cg24506088,cg18630580,cg22056544,cg00238362,cg05596841,cg21830122,cg14698808	TNXB	Body	opensea=12	GO:0007155,cell adhesion|GO:0030036,actin cytoskeleton organization|GO:0030199,collagen fibril organization|GO:0032963,collagen metabolic process|GO:0048251,elastic fiber assembly	GO:0005178,integrin binding|GO:0005515,protein binding|GO:0008201,heparin binding	GO:0005576,extracellular region|GO:0005578,proteinaceous extracellular matrix|GO:0005583,fibrillar collagen trimer|GO:0005615,extracellular space|GO:0005622,intracellular|GO:0031012,extracellular matrix|GO:0031012,extracellular matrix|GO:0031012,extracellular matrix|GO:0070062,extracellular exosome	hsa04151 PI3K-Akt signaling pathway - Homo sapiens (human)|hsa04510 Focal adhesion - Homo sapiens (human)|hsa04512 ECM-receptor interaction - Homo sapiens (human)|hsa05206 MicroRNAs in cancer - Homo sapiens (human)	0.479857	0.505607	0.486811	0.533631	0.522199	0.616829	0.627826	0.605666	0.619417	0.660072	0.187008	0.995823	0.70114	0.000146301	0.00284214	0.0255529
DMR_251	17	7832479	7833663	1184	11	cg01449995,cg25343509,cg13377102,cg27162435,cg01323777,cg16513459,cg13407335,cg15951188,cg14918082,cg03386903,cg13697368	KCNAB3,TRAPPC1	TSS1500	Island=6,N_Shore=5	GO:0006813,potassium ion transport|GO:0034765,regulation of ion transmembrane transport|GO:0065009,regulation of molecular function|GO:0071805,potassium ion transmembrane transport,GO:0006888,ER to Golgi vesicle-mediated transport|GO:0043312,neutrophil degranulation|GO:0048208,COPII vesicle coating|GO:0065009,regulation of molecular function	GO:0005249,voltage-gated potassium channel activity|GO:0015459,potassium channel regulator activity,GO:0017112,Rab guanyl-nucleotide exchange factor activity|GO:0017112,Rab guanyl-nucleotide exchange factor activity	GO:0005737,cytoplasm|GO:0005886,plasma membrane|GO:0016021,integral component of membrane,GO:0000139,Golgi membrane|GO:0005576,extracellular region|GO:0005783,endoplasmic reticulum|GO:0005829,cytosol|GO:0030008,TRAPP complex|GO:0035578,azurophil granule lumen		0.348141	0.297565	0.356459	0.314204	0.344197	0.497043	0.5025	0.460875	0.513708	0.554868	0.275846	0.969339	0.552588	0.000154907	0.00290902	0.0261541
DMR_252	1	84326185	84326856	671	9	cg02483449,cg14790630,cg26347197,cg02531516,cg07807165,cg03681926,cg18116902,cg10806543,cg07908237	,LOC101927560	TSS200	Island=6,N_Shore=2,S_Shore=1					0.161186	0.138265	0.159275	0.156272	0.16915	0.347914	0.232879	0.33748	0.354859	0.290356	0.272178	0.640149	0.477723	0.000172119	0.00309059	0.0277866
DMR_253	10	26726804	26727261	457	9	cg04728480,cg10763878,cg19350729,cg06157318,cg26467035,cg14022711,cg24427018,cg06535993,cg27303981	APBB1IP	TSS1500	Island=4,N_Shore=5	GO:0002291,T cell activation via T cell receptor contact with antigen bound to MHC molecule on antigen presenting cell|GO:0007165,signal transduction|GO:0045785,positive regulation of cell adhesion	GO:0005515,protein binding	GO:0005829,cytosol|GO:0005829,cytosol|GO:0005856,cytoskeleton|GO:0005886,plasma membrane|GO:0005925,focal adhesion|GO:0030027,lamellipodium|GO:0042101,T cell receptor complex	hsa04015 Rap1 signaling pathway - Homo sapiens (human)|hsa04611 Platelet activation - Homo sapiens (human)	0.275802	0.257542	0.261914	0.264533	0.284424	0.104329	0.169548	0.0970927	0.103216	0.148812	1.25814	3.39236	2.32076	0.000172119	0.00309059	0.0277866
DMR_254	10	45406601	45406847	246	4	cg06994016,cg04218760,cg05187965,cg26700422	TMEM72	TSS200	opensea=4			GO:0016021,integral component of membrane		0.147171	0.104903	0.171796	0.135186	0.172031	0.316271	0.292891	0.265385	0.344311	0.400369	0.293353	0.510932	0.420704	0.00023236	0.00374017	0.0336268
DMR_255	15	63797637	63798201	564	4	cg22599514,cg07512971,cg03988119,cg18283916	USP3	Body	Island=1,S_Shore=3	GO:0000122,negative regulation of transcription from RNA polymerase II promoter|GO:0000278,mitotic cell cycle|GO:0006281,DNA repair|GO:0006355,regulation of transcription, DNA-templated|GO:0006511,ubiquitin-dependent protein catabolic process|GO:0016578,histone deubiquitination|GO:0016579,protein deubiquitination|GO:0031647,regulation of protein stability	GO:0001046,core promoter sequence-specific DNA binding|GO:0003682,chromatin binding|GO:0004843,thiol-dependent ubiquitin-specific protease activity|GO:0008270,zinc ion binding|GO:0036459,thiol-dependent ubiquitinyl hydrolase activity|GO:0042393,histone binding	GO:0000790,nuclear chromatin|GO:0005634,nucleus|GO:0005654,nucleoplasm|GO:0005654,nucleoplasm|GO:0090543,Flemming body		0.119908	0.10954	0.135312	0.156354	0.186427	0.0655134	0.0545846	0.0321729	0.0302659	0.0543459	0.553856	4.61746	2.29937	0.00023236	0.00374017	0.0336268
DMR_256	10	123871953	123872229	276	3	cg09624870,cg11201889,cg09631043	TACC2	TSS1500	Island=1,N_Shore=2	GO:0000226,microtubule cytoskeleton organization|GO:0008283,cell proliferation|GO:0021987,cerebral cortex development	GO:0035257,nuclear hormone receptor binding	GO:0005654,nucleoplasm|GO:0005737,cytoplasm|GO:0005815,microtubule organizing center|GO:0005829,cytosol|GO:0005886,plasma membrane|GO:0015630,microtubule cytoskeleton		0.029955	0.0289852	0.0356997	0.0304613	0.0318384	0.0722231	0.0835468	0.0470569	0.135714	0.124997	0.169852	0.886359	0.452306	0.000154907	0.00290902	0.0261541
DMR_257	15	71144980	71145252	272	3	cg20645232,cg06132502,cg27099951	LARP6	Body	N_Shore=3	GO:0006396,RNA processing|GO:0006417,regulation of translation|GO:1902416,positive regulation of mRNA binding	GO:0005515,protein binding|GO:0048027,mRNA 5'-UTR binding|GO:1990825,sequence-specific mRNA binding	GO:0005634,nucleus|GO:0005737,cytoplasm|GO:0005844,polysome|GO:0030529,intracellular ribonucleoprotein complex		0.532299	0.561216	0.534142	0.648398	0.661833	0.287276	0.29681	0.218008	0.342321	0.429059	1.39352	2.67615	2.09	0.00018933	0.00330741	0.029736
DMR_258	12	57624193	57624530	337	3	cg25110782,cg11851129,cg08228578	SHMT2	Body	S_Shore=3	GO:0006544,glycine metabolic process|GO:0006563,L-serine metabolic process|GO:0006564,L-serine biosynthetic process|GO:0006730,one-carbon metabolic process|GO:0008284,positive regulation of cell proliferation|GO:0019264,glycine biosynthetic process from serine|GO:0034340,response to type I interferon|GO:0035999,tetrahydrofolate interconversion|GO:0046653,tetrahydrofolate metabolic process|GO:0046…	GO:0003682,chromatin binding|GO:0004372,glycine hydroxymethyltransferase activity|GO:0004372,glycine hydroxymethyltransferase activity|GO:0005515,protein binding|GO:0008732,L-allo-threonine aldolase activity|GO:0016597,amino acid binding|GO:0030170,pyridoxal phosphate binding|GO:0042802,identical protein binding	GO:0005634,nucleus|GO:0005737,cytoplasm|GO:0005739,mitochondrion|GO:0005743,mitochondrial inner membrane|GO:0005743,mitochondrial inner membrane|GO:0005758,mitochondrial intermembrane space|GO:0005759,mitochondrial matrix|GO:0015630,microtubule cytoskeleton|GO:0042645,mitochondrial nucleoid|GO:0070062,extracellular exosome|GO:0070552,BRISC complex	hsa00260 Glycine, serine and threonine metabolism - Homo sapiens (human)|hsa00630 Glyoxylate and dicarboxylate metabolism - Homo sapiens (human)|hsa00670 One carbon pool by folate - Homo sapiens (human)|hsa01100 Metabolic pathways - Homo sapiens (human)|hsa01200 Carbon metabolism - Homo sapiens (human)|hsa01230 Biosynthesis of amino acids - Homo sapiens (human)|hsa01523 Antifolate resistance - Ho…	0.0745408	0.0482041	0.0943934	0.0592487	0.0869871	0.199347	0.184795	0.117766	0.247907	0.267093	0.296873	0.416292	0.352097	0.000215148	0.003673	0.0330229
DMR_259	15	89922602	89922989	387	3	cg12364131,cg07038187,cg04600027	LOC254559	Body	Island=1,S_Shore=2					0.332588	0.430728	0.396538	0.39618	0.498253	0.658381	0.564185	0.583788	0.569059	0.609026	0.520161	0.79325	0.654843	0.00023236	0.00374017	0.0336268
DMR_260	2	228582401	228582488	87	3	cg13466956,cg07417745,cg25713185	SLC19A3	5'UTR	Island=2,N_Shore=1	GO:0042723,thiamine-containing compound metabolic process|GO:0071934,thiamine transmembrane transport|GO:0071934,thiamine transmembrane transport	GO:0015234,thiamine transmembrane transporter activity	GO:0005886,plasma membrane|GO:0016021,integral component of membrane	hsa04977 Vitamin digestion and absorption - Homo sapiens (human)	0.0277945	0.0203967	0.0370517	0.0234209	0.030346	0.0700828	0.0749569	0.0432021	0.120259	0.12487	0.25985	0.493837	0.382061	0.00023236	0.00374017	0.0336268
DMR_261	17	30812978	30813178	200	3	cg06279626,cg10898212,cg04106785	CDK5R1	TSS1500	Island=1,N_Shore=2	GO:0000079,regulation of cyclin-dependent protein serine/threonine kinase activity|GO:0001764,neuron migration|GO:0007158,neuron cell-cell adhesion|GO:0007213,G-protein coupled acetylcholine receptor signaling pathway|GO:0007411,axon guidance|GO:0007413,axonal fasciculation|GO:0007420,brain development|GO:0007420,brain development|GO:0008283,cell proliferation|GO:0009790,embryo development|GO:001…	GO:0004672,protein kinase activity|GO:0005509,calcium ion binding|GO:0005515,protein binding|GO:0016301,kinase activity|GO:0016534,cyclin-dependent protein kinase 5 activator activity|GO:0019901,protein kinase binding|GO:0043539,protein serine/threonine kinase activator activity|GO:0043539,protein serine/threonine kinase activator activity|GO:0045296,cadherin binding|GO:0046875,ephrin receptor bi…	GO:0005634,nucleus|GO:0005654,nucleoplasm|GO:0005654,nucleoplasm|GO:0005737,cytoplasm|GO:0005829,cytosol|GO:0005886,plasma membrane|GO:0014069,postsynaptic density|GO:0016020,membrane|GO:0016533,cyclin-dependent protein kinase 5 holoenzyme complex|GO:0030424,axon|GO:0030425,dendrite|GO:0030426,growth cone|GO:0031594,neuromuscular junction|GO:0043025,neuronal cell body|GO:0043197,dendritic spine|G…	hsa05010 Alzheimer's disease - Homo sapiens (human)|hsa05030 Cocaine addiction - Homo sapiens (human)	0.311302	0.273247	0.320942	0.311642	0.351518	0.3285	0.304649	0.259674	0.38061	0.433784	0.407831	1.16443	0.662179	0.000258178	0.00406856	0.0365792
DMR_262	14	102510101	102510793	692	9	cg01640443,cg11799843,cg19733938,cg05708028,cg01109333,cg11881702,cg09159519,cg14129790,cg19493442	DYNC1H1	Body	opensea=9	GO:0000086,G2/M transition of mitotic cell cycle|GO:0006888,ER to Golgi vesicle-mediated transport|GO:0007052,mitotic spindle organization|GO:0007062,sister chromatid cohesion|GO:0010389,regulation of G2/M transition of mitotic cell cycle|GO:0019886,antigen processing and presentation of exogenous peptide antigen via MHC class II|GO:0031122,cytoplasmic microtubule organization|GO:0032388,positive…	GO:0003723,RNA binding|GO:0005515,protein binding|GO:0005524,ATP binding|GO:0008569,ATP-dependent microtubule motor activity, minus-end-directed|GO:0045503,dynein light chain binding|GO:0045505,dynein intermediate chain binding|GO:0051959,dynein light intermediate chain binding	GO:0005576,extracellular region|GO:0005813,centrosome|GO:0005829,cytosol|GO:0005868,cytoplasmic dynein complex|GO:0005868,cytoplasmic dynein complex|GO:0005874,microtubule|GO:0016020,membrane|GO:0030175,filopodium|GO:0031012,extracellular matrix|GO:0035578,azurophil granule lumen|GO:0070062,extracellular exosome	hsa04145 Phagosome - Homo sapiens (human)|hsa04962 Vasopressin-regulated water reabsorption - Homo sapiens (human)|hsa05132 Salmonella infection - Homo sapiens (human)	0.463323	0.390861	0.433714	0.425932	0.446324	0.600365	0.577279	0.549255	0.643184	0.625022	0.276317	0.951615	0.633771	0.00018933	0.00330741	0.029736
DMR_263	19	18284045	18284450	405	7	cg15825970,cg26152923,cg01485548,cg26638520,cg07533630,cg13549667,cg04096365	IFI30	TSS1500	N_Shore=7	GO:0019886,antigen processing and presentation of exogenous peptide antigen via MHC class II|GO:0042590,antigen processing and presentation of exogenous peptide antigen via MHC class I|GO:0055114,oxidation-reduction process|GO:0060333,interferon-gamma-mediated signaling pathway	GO:0005515,protein binding|GO:0016667,oxidoreductase activity, acting on a sulfur group of donors|GO:0016667,oxidoreductase activity, acting on a sulfur group of donors	GO:0005576,extracellular region|GO:0005764,lysosome|GO:0005829,cytosol|GO:0030054,cell junction|GO:0043202,lysosomal lumen|GO:0043231,intracellular membrane-bounded organelle	hsa04612 Antigen processing and presentation - Homo sapiens (human)	0.270466	0.272798	0.267997	0.289699	0.335772	0.136505	0.138	0.110394	0.142392	0.160735	1.24872	3.86784	2.29214	0.000249572	0.00398872	0.0358615
DMR_264	1	153599479	153600156	677	13	cg19335413,cg13946767,cg02331910,cg02573566,cg00012362,cg17776284,cg02873163,cg27469660,cg06562291,cg11343894,cg07898899,cg04077668,cg01347250	S100A13	TSS1500	opensea=13	GO:0008284,positive regulation of cell proliferation|GO:0008360,regulation of cell shape|GO:0043123,positive regulation of I-kappaB kinase/NF-kappaB signaling|GO:0043303,mast cell degranulation|GO:0046688,response to copper ion|GO:0050663,cytokine secretion|GO:0050703,interleukin-1 alpha secretion|GO:0051602,response to electrical stimulus	GO:0005507,copper ion binding|GO:0005509,calcium ion binding|GO:0005515,protein binding|GO:0008270,zinc ion binding|GO:0008289,lipid binding|GO:0017134,fibroblast growth factor binding|GO:0042803,protein homodimerization activity|GO:0050786,RAGE receptor binding	GO:0005576,extracellular region|GO:0005615,extracellular space|GO:0005634,nucleus|GO:0005730,nucleolus|GO:0005737,cytoplasm|GO:0005829,cytosol|GO:0005886,plasma membrane|GO:0042629,mast cell granule|GO:0048471,perinuclear region of cytoplasm|GO:0070062,extracellular exosome		0.033819	0.0327139	0.0607954	0.0398291	0.0624416	0.107601	0.114798	0.0492029	0.110114	0.17279	0.294985	0.636569	0.435164	0.000129089	0.00271871	0.0244431
DMR_265	17	76713041	76713805	764	8	cg12408363,cg26066951,cg00774077,cg16199176,cg10000837,cg23725139,cg13668327,cg12871285	CYTH1	TSS1500	opensea=8	GO:0016192,vesicle-mediated transport|GO:0030155,regulation of cell adhesion|GO:0032012,regulation of ARF protein signal transduction|GO:0065009,regulation of molecular function|GO:0090162,establishment of epithelial cell polarity	GO:0005086,ARF guanyl-nucleotide exchange factor activity|GO:0005515,protein binding|GO:0008289,lipid binding	GO:0000139,Golgi membrane|GO:0005737,cytoplasm|GO:0005829,cytosol|GO:0005829,cytosol|GO:0005886,plasma membrane|GO:0005912,adherens junction|GO:0005923,bicellular tight junction|GO:0031234,extrinsic component of cytoplasmic side of plasma membrane	hsa04072 Phospholipase D signaling pathway - Homo sapiens (human)|hsa04144 Endocytosis - Homo sapiens (human)	0.0526552	0.0446482	0.0755144	0.0523495	0.0769914	0.0999726	0.103953	0.0630724	0.168617	0.208835	0.251476	0.778063	0.418855	0.00023236	0.00374017	0.0336268
DMR_266	5	43017685	43018629	944	7	cg12319602,cg01567239,cg17765151,cg14919554,cg11671913,cg11549953,cg04041707	,LOC648987	Body	Island=6,N_Shore=1					0.0592019	0.103749	0.116866	0.0917133	0.13806	0.0418496	0.0382419	0.0208012	0.0388637	0.0590914	1.51051	3.5866	2.73439	0.000258178	0.00406856	0.0365792
DMR_267	17	77018427	77018979	552	7	cg20753341,cg26510796,cg12536361,cg14852821,cg15279718,cg08106503,cg08967388	C1QTNF1	TSS1500	N_Shore=7	GO:0007204,positive regulation of cytosolic calcium ion concentration|GO:0010544,negative regulation of platelet activation|GO:0010628,positive regulation of gene expression|GO:0010906,regulation of glucose metabolic process|GO:0043410,positive regulation of MAPK cascade|GO:0051260,protein homooligomerization|GO:0051897,positive regulation of protein kinase B signaling|GO:0070208,protein heterotr…	GO:0005515,protein binding|GO:0005518,collagen binding	GO:0005581,collagen trimer|GO:0005615,extracellular space|GO:0005634,nucleus|GO:0005829,cytosol|GO:0005887,integral component of plasma membrane		0.882276	0.910759	0.891597	0.912406	0.921799	0.76341	0.80764	0.780074	0.708879	0.809474	1.10234	1.27312	1.17075	0.000258178	0.00406856	0.0365792
DMR_268	1	234667363	234667549	186	6	cg19856705,cg02550311,cg07872560,cg21546522,cg10811426,cg12657297	,LINC01354	TSS200	opensea=6					0.159842	0.149547	0.214494	0.126443	0.187488	0.286626	0.294337	0.252237	0.355003	0.405064	0.247633	0.826671	0.497021	0.000258178	0.00406856	0.0365792
DMR_269	12	6975769	6976179	410	4	cg26585348,cg15325042,cg00790693,cg01607849	TPI1	TSS1500	N_Shore=4	GO:0006094,gluconeogenesis|GO:0006094,gluconeogenesis|GO:0006094,gluconeogenesis|GO:0006096,glycolytic process|GO:0006098,pentose-phosphate shunt|GO:0007275,multicellular organism development|GO:0019563,glycerol catabolic process|GO:0046166,glyceraldehyde-3-phosphate biosynthetic process|GO:0061621,canonical glycolysis	GO:0004807,triose-phosphate isomerase activity|GO:0004807,triose-phosphate isomerase activity|GO:0004807,triose-phosphate isomerase activity|GO:0005515,protein binding|GO:0031625,ubiquitin protein ligase binding	GO:0005615,extracellular space|GO:0005634,nucleus|GO:0005829,cytosol|GO:0005829,cytosol|GO:0070062,extracellular exosome	hsa00010 Glycolysis / Gluconeogenesis - Homo sapiens (human)|hsa00051 Fructose and mannose metabolism - Homo sapiens (human)|hsa00562 Inositol phosphate metabolism - Homo sapiens (human)|hsa01100 Metabolic pathways - Homo sapiens (human)|hsa01200 Carbon metabolism - Homo sapiens (human)|hsa01230 Biosynthesis of amino acids - Homo sapiens (human)	0.056514	0.0301431	0.0688846	0.0376116	0.0660868	0.13782	0.130273	0.102196	0.176973	0.225039	0.298475	0.507343	0.394057	0.000283996	0.00436849	0.0392759
DMR_270	16	54972078	54973966	1888	13	cg13744172,cg16602661,cg07271394,cg02377941,cg08454455,cg00747944,cg03426023,cg16387593,cg06138439,cg10214640,cg15916160,cg01047631,cg08732659		IGR	Island=7,S_Shore=6					0.353837	0.343318	0.309294	0.285404	0.259307	0.541136	0.552287	0.535367	0.537067	0.380089	0.413559	0.761494	0.593074	0.000137695	0.0028081	0.0252468
DMR_271	14	24640895	24641706	811	13	cg18512948,cg16473141,cg18556834,cg03431846,cg19989295,cg14622790,cg10137231,cg07516252,cg16425038,cg18534491,cg25040004,cg18628371,cg24127861	REC8	TSS1500	Island=10,N_Shore=3	GO:0000724,double-strand break repair via homologous recombination|GO:0001556,oocyte maturation|GO:0006302,double-strand break repair|GO:0007062,sister chromatid cohesion|GO:0007130,synaptonemal complex assembly|GO:0007131,reciprocal meiotic recombination|GO:0007141,male meiosis I|GO:0007283,spermatogenesis|GO:0007286,spermatid development|GO:0009566,fertilization|GO:0051321,meiotic cell cycle|GO…	GO:0003682,chromatin binding	GO:0000778,condensed nuclear chromosome kinetochore|GO:0000798,nuclear cohesin complex|GO:0000800,lateral element|GO:0001673,male germ cell nucleus|GO:0005634,nucleus|GO:0030893,meiotic cohesin complex|GO:0034991,nuclear meiotic cohesin complex	hsa04114 Oocyte meiosis - Homo sapiens (human)	0.122225	0.101528	0.119516	0.109234	0.1212	0.263992	0.246159	0.18139	0.263898	0.211057	0.259288	0.861644	0.480021	0.000146301	0.00284214	0.0255529
DMR_272	3	149374535	149375085	550	6	cg15043384,cg14557185,cg02056062,cg23017915,cg21951391,cg06253058	WWTR1,WWTR1-AS1	TSS1500	Island=4,N_Shore=2	GO:0000122,negative regulation of transcription from RNA polymerase II promoter|GO:0001649,osteoblast differentiation|GO:0001933,negative regulation of protein phosphorylation|GO:0006355,regulation of transcription, DNA-templated|GO:0006367,transcription initiation from RNA polymerase II promoter|GO:0006469,negative regulation of protein kinase activity|GO:0008284,positive regulation of cell prol…	GO:0003713,transcription coactivator activity|GO:0003713,transcription coactivator activity|GO:0003714,transcription corepressor activity|GO:0005515,protein binding|GO:0042803,protein homodimerization activity,	GO:0005634,nucleus|GO:0005634,nucleus|GO:0005654,nucleoplasm|GO:0005654,nucleoplasm|GO:0005667,transcription factor complex|GO:0005737,cytoplasm|GO:0005829,cytosol|GO:0005829,cytosol|GO:0016604,nuclear body,	hsa04390 Hippo signaling pathway - Homo sapiens (human)|hsa04392 Hippo signaling pathway -multiple species - Homo sapiens (human),	0.0455427	0.024035	0.0590956	0.0300399	0.0436863	0.116211	0.0986545	0.0615188	0.177305	0.144754	0.263351	0.875624	0.418424	0.00027539	0.00426523	0.0383474
DMR_273	19	35606534	35607073	539	6	cg00480115,cg21122474,cg01408817,cg02633817,cg09866888,cg14692619	FXYD3	TSS200	opensea=6	GO:0006813,potassium ion transport|GO:0006814,sodium ion transport|GO:0006821,chloride transport|GO:0034220,ion transmembrane transport|GO:1902476,chloride transmembrane transport|GO:1903779,regulation of cardiac conduction|GO:2000649,regulation of sodium ion transmembrane transporter activity	GO:0005254,chloride channel activity|GO:0017080,sodium channel regulator activity	GO:0005886,plasma membrane|GO:0005886,plasma membrane|GO:0005887,integral component of plasma membrane|GO:0070062,extracellular exosome		0.377099	0.327812	0.400322	0.369785	0.417142	0.547682	0.487019	0.438551	0.52736	0.577773	0.304588	0.997856	0.576311	0.00027539	0.00426523	0.0383474
DMR_274	17	76975944	76976245	301	5	cg14870271,cg11202345,cg04927537,cg18749404,cg22713958	LGALS3BP	TSS200	opensea=5	GO:0002576,platelet degranulation|GO:0006898,receptor-mediated endocytosis|GO:0006968,cellular defense response|GO:0007155,cell adhesion|GO:0007165,signal transduction	GO:0005044,scavenger receptor activity	GO:0005576,extracellular region|GO:0005576,extracellular region|GO:0005578,proteinaceous extracellular matrix|GO:0005615,extracellular space|GO:0016020,membrane|GO:0031012,extracellular matrix|GO:0031012,extracellular matrix|GO:0031089,platelet dense granule lumen|GO:0070062,extracellular exosome|GO:0072562,blood microparticle		0.688875	0.747873	0.727055	0.72677	0.7644	0.521994	0.548895	0.514387	0.472766	0.571693	1.08725	2.02793	1.52582	0.000292601	0.00441055	0.039654
DMR_275	2	238535538	238535910	372	4	cg21532103,cg20793359,cg26271045,cg15674193	LRRFIP1	TSS1500	Island=3,N_Shore=1	GO:0000122,negative regulation of transcription from RNA polymerase II promoter|GO:0006351,transcription, DNA-templated|GO:0006357,regulation of transcription from RNA polymerase II promoter|GO:0032481,positive regulation of type I interferon production|GO:0045892,negative regulation of transcription, DNA-templated|GO:0051092,positive regulation of NF-kappaB transcription factor activity	GO:0000978,RNA polymerase II proximal promoter sequence-specific DNA binding|GO:0001078,transcriptional repressor activity, RNA polymerase II proximal promoter sequence-specific DNA binding|GO:0003677,DNA binding|GO:0003725,double-stranded RNA binding|GO:0005515,protein binding|GO:0042803,protein homodimerization activity|GO:0045296,cadherin binding	GO:0005634,nucleus|GO:0005737,cytoplasm|GO:0005829,cytosol|GO:0005829,cytosol|GO:0005856,cytoskeleton|GO:0005886,plasma membrane		0.247303	0.229746	0.266262	0.229773	0.257239	0.395188	0.37558	0.357878	0.384299	0.400354	0.344307	0.799378	0.554123	0.000292601	0.00441055	0.039654
DMR_276	20	32262772	32263104	332	4	cg19193852,cg20721921,cg02899870,cg23687971	NECAB3	TSS1500	N_Shore=4	GO:0009306,protein secretion|GO:0019538,protein metabolic process|GO:0042984,regulation of amyloid precursor protein biosynthetic process	GO:0005509,calcium ion binding|GO:0005515,protein binding	GO:0000137,Golgi cis cisterna|GO:0005634,nucleus|GO:0005737,cytoplasm|GO:0005789,endoplasmic reticulum membrane|GO:0005794,Golgi apparatus		0.0496804	0.0363589	0.0623165	0.0490947	0.0617545	0.120256	0.10686	0.0728102	0.171316	0.188032	0.278807	0.70737	0.438083	0.000292601	0.00441055	0.039654
DMR_277	15	74218418	74218921	503	10	cg00028013,cg14435807,cg04436755,cg12594244,cg02812767,cg10372921,cg22590761,cg00071887,cg20652404,cg00527825	LOXL1	TSS1500	Island=7,N_Shore=3	GO:0018277,protein deamination|GO:0030198,extracellular matrix organization|GO:0032496,response to lipopolysaccharide|GO:0035904,aorta development|GO:0055114,oxidation-reduction process	GO:0005507,copper ion binding|GO:0016641,oxidoreductase activity, acting on the CH-NH2 group of donors, oxygen as acceptor	GO:0001669,acrosomal vesicle|GO:0005576,extracellular region|GO:0005604,basement membrane|GO:0005615,extracellular space|GO:0031012,extracellular matrix|GO:0031012,extracellular matrix		0.101387	0.0958599	0.116726	0.103257	0.118026	0.170178	0.164309	0.102869	0.235039	0.210556	0.258632	1.57231	0.507162	0.000223754	0.00374017	0.0336268
DMR_278	13	34184932	34185311	379	6	cg06133910,cg09753013,cg20749792,cg04667114,cg19928955,cg16048522	,STARD13	5'UTR	opensea=6	,GO:0007165,signal transduction|GO:0043542,endothelial cell migration|GO:0043542,endothelial cell migration|GO:0043547,positive regulation of GTPase activity|GO:0051056,regulation of small GTPase mediated signal transduction|GO:0090051,negative regulation of cell migration involved in sprouting angiogenesis|GO:0090051,negative regulation of cell migration involved in sprouting angiogenesis|GO:009…	,GO:0005096,GTPase activator activity|GO:0005515,protein binding|GO:0008289,lipid binding	,GO:0005811,lipid droplet|GO:0005829,cytosol|GO:0031966,mitochondrial membrane		0.107167	0.0772076	0.145644	0.101485	0.141344	0.192701	0.183923	0.125266	0.233067	0.278031	0.243376	0.787668	0.455681	0.000309813	0.00463897	0.0417076
DMR_279	5	66124167	66124395	228	3	cg05088356,cg19217739,cg07034329	MAST4	TSS1500	opensea=3	GO:0007010,cytoskeleton organization|GO:0018105,peptidyl-serine phosphorylation|GO:0035556,intracellular signal transduction	GO:0000287,magnesium ion binding|GO:0004674,protein serine/threonine kinase activity|GO:0005524,ATP binding	GO:0005622,intracellular|GO:0005737,cytoplasm		0.0414335	0.033596	0.0587393	0.039834	0.0494195	0.109036	0.111978	0.069952	0.165646	0.163398	0.231434	0.464388	0.364525	0.000318419	0.0047053	0.042304
DMR_280	11	94245309	94245440	131	3	cg18973628,cg27340529,cg22974463	,C11orf97	TSS1500	N_Shore=3					0.0579267	0.0703054	0.0686374	0.0830703	0.0982949	0.200831	0.140387	0.17791	0.211545	0.234398	0.29822	0.601954	0.440699	0.000327025	0.00476991	0.0428849
DMR_281	6	31695970	31696775	805	21	cg04074004,cg14293129,cg25845158,cg26111283,cg26978172,cg16359915,cg25095032,cg09632273,cg00941576,cg16936944,cg19008099,cg08550588,cg08509383,cg23760103,cg08021615,cg16704889,cg21286967,cg04161526,cg17309530,cg07944381,cg27506783	DDAH2	Body	Island=21	GO:0000052,citrulline metabolic process|GO:0006527,arginine catabolic process|GO:0006809,nitric oxide biosynthetic process|GO:0007263,nitric oxide mediated signal transduction|GO:0043066,negative regulation of apoptotic process|GO:0045429,positive regulation of nitric oxide biosynthetic process|GO:0050999,regulation of nitric-oxide synthase activity	GO:0003824,catalytic activity|GO:0005515,protein binding|GO:0016403,dimethylargininase activity|GO:0016403,dimethylargininase activity|GO:0016597,amino acid binding	GO:0005739,mitochondrion|GO:0005815,microtubule organizing center|GO:0005829,cytosol|GO:0005829,cytosol|GO:0070062,extracellular exosome		0.389747	0.440932	0.397933	0.484934	0.505532	0.5823	0.5208	0.570799	0.536254	0.625442	0.560012	1.0038	0.763673	0.000137695	0.0028081	0.0252468
DMR_282	10	126716434	126717502	1068	11	cg08515044,cg08734124,cg17747450,cg02294138,cg20331765,cg13433263,cg01008023,cg20242222,cg02631583,cg22769890,cg06240209	CTBP2	TSS1500	S_Shore=11	GO:0006351,transcription, DNA-templated|GO:0008285,negative regulation of cell proliferation|GO:0019079,viral genome replication|GO:0035563,positive regulation of chromatin binding|GO:0045892,negative regulation of transcription, DNA-templated|GO:0045944,positive regulation of transcription from RNA polymerase II promoter|GO:0048386,positive regulation of retinoic acid receptor signaling pathway|…	GO:0003682,chromatin binding|GO:0003713,transcription coactivator activity|GO:0003714,transcription corepressor activity|GO:0005515,protein binding|GO:0016618,hydroxypyruvate reductase activity|GO:0019901,protein kinase binding|GO:0030267,glyoxylate reductase (NADP) activity|GO:0032403,protein complex binding|GO:0042803,protein homodimerization activity|GO:0042974,retinoic acid receptor binding|G…	GO:0005634,nucleus|GO:0005634,nucleus|GO:0005829,cytosol|GO:0017053,transcriptional repressor complex|GO:0030054,cell junction|GO:0097470,ribbon synapse	hsa04310 Wnt signaling pathway - Homo sapiens (human)|hsa04330 Notch signaling pathway - Homo sapiens (human)|hsa05200 Pathways in cancer - Homo sapiens (human)|hsa05220 Chronic myeloid leukemia - Homo sapiens (human)	0.518704	0.536559	0.544567	0.52208	0.536364	0.717543	0.70249	0.710835	0.708534	0.710478	0.502724	0.960232	0.718018	0.000215148	0.003673	0.0330229
DMR_283	1	111742914	111743537	623	9	cg23184711,cg19269039,cg19268695,cg00619207,cg04581793,cg20317872,cg08864105,cg18924738,cg23631538	DENND2D	TSS1500	N_Shelf=9	GO:0065009,regulation of molecular function	GO:0005515,protein binding|GO:0017112,Rab guanyl-nucleotide exchange factor activity	GO:0005654,nucleoplasm|GO:0005829,cytosol		0.815881	0.828658	0.797447	0.839264	0.839268	0.665492	0.6555	0.663728	0.643434	0.672388	0.994659	1.53203	1.27367	0.000266784	0.00416053	0.0374062
DMR_284	8	26721736	26723021	1285	13	cg07645844,cg03042573,cg10647509,cg09557462,cg02217408,cg20303399,cg09714127,cg01338924,cg17963840,cg21230493,cg23008606,cg18654812,cg02409177	ADRA1A	TSS200	Island=13	GO:0001985,negative regulation of heart rate involved in baroreceptor response to increased systemic arterial blood pressure|GO:0001994,norepinephrine-epinephrine vasoconstriction involved in regulation of systemic arterial blood pressure|GO:0001996,positive regulation of heart rate by epinephrine-norepinephrine|GO:0001997,positive regulation of the force of heart contraction by epinephrine-norep…	GO:0004937,alpha1-adrenergic receptor activity|GO:0004937,alpha1-adrenergic receptor activity|GO:0004937,alpha1-adrenergic receptor activity|GO:0005515,protein binding|GO:0046982,protein heterodimerization activity	GO:0005634,nucleus|GO:0005737,cytoplasm|GO:0005886,plasma membrane|GO:0005886,plasma membrane|GO:0005887,integral component of plasma membrane|GO:0005901,caveola|GO:0030018,Z disc|GO:0030315,T-tubule|GO:0031965,nuclear membrane	hsa04020 Calcium signaling pathway - Homo sapiens (human)|hsa04022 cGMP-PKG signaling pathway - Homo sapiens (human)|hsa04080 Neuroactive ligand-receptor interaction - Homo sapiens (human)|hsa04152 AMPK signaling pathway - Homo sapiens (human)|hsa04261 Adrenergic signaling in cardiomyocytes - Homo sapiens (human)|hsa04270 Vascular smooth muscle contraction - Homo sapiens (human)|hsa04970 Salivary…	0.0747547	0.0718345	0.076879	0.068278	0.0750108	0.141747	0.116918	0.188523	0.133498	0.155454	0.268572	0.710801	0.464455	0.000172119	0.00309059	0.0277866
DMR_285	10	102279330	102279954	624	13	cg26705561,cg02752765,cg24467927,cg01072942,cg23725321,cg26458072,cg20831708,cg26381313,cg04835284,cg05064489,cg00730561,cg03415883,cg04611437	SEC31B	TSS1500	Island=7,S_Shore=6	GO:0015031,protein transport|GO:0016192,vesicle-mediated transport		GO:0005789,endoplasmic reticulum membrane|GO:0012507,ER to Golgi transport vesicle membrane|GO:0030120,vesicle coat	hsa04141 Protein processing in endoplasmic reticulum - Homo sapiens (human)	0.105711	0.0836006	0.121119	0.0947428	0.119519	0.169354	0.161544	0.128852	0.253638	0.241381	0.245888	0.721072	0.471885	0.000172119	0.00309059	0.0277866
DMR_286	10	63808748	63809170	422	13	cg06456847,cg17973778,cg22846816,cg08241406,cg00928816,cg16389209,cg20746552,cg23468816,cg01969278,cg07520810,cg14789659,cg16401465,cg08783988	ARID5B	TSS1500	opensea=13	GO:0000122,negative regulation of transcription from RNA polymerase II promoter|GO:0001822,kidney development|GO:0001889,liver development|GO:0006351,transcription, DNA-templated|GO:0008584,male gonad development|GO:0008585,female gonad development|GO:0009791,post-embryonic development|GO:0010761,fibroblast migration|GO:0016577,histone demethylation|GO:0030325,adrenal gland development|GO:0035264…	GO:0000977,RNA polymerase II regulatory region sequence-specific DNA binding|GO:0001227,transcriptional repressor activity, RNA polymerase II transcription regulatory region sequence-specific DNA binding|GO:0003677,DNA binding|GO:0003713,transcription coactivator activity|GO:0005515,protein binding|GO:0032452,histone demethylase activity|GO:0044212,transcription regulatory region DNA binding	GO:0005634,nucleus|GO:0005654,nucleoplasm		0.0398377	0.031798	0.058262	0.0372738	0.0603996	0.079735	0.0732067	0.0498119	0.143371	0.183913	0.261752	0.666989	0.410272	0.000180724	0.00321947	0.0289453
DMR_287	14	101528123	101528671	548	11	cg22542859,cg22823821,cg05224126,cg11134801,cg10006887,cg11120364,cg11721554,cg18163364,cg13166942,cg14906110,cg05138957	MIR377,	TSS1500	N_Shelf=11					0.424561	0.423524	0.489462	0.419975	0.486457	0.670353	0.635801	0.608731	0.588548	0.632998	0.324543	1.18442	0.684877	0.00023236	0.00374017	0.0336268
DMR_288	1	1293868	1295147	1279	11	cg03397519,cg23973885,cg18550476,cg00970622,cg26108719,cg17132079,cg22273474,cg23036947,cg27399052,cg01198994,cg12478066	MXRA8	TSS1500	opensea=1,S_Shelf=10	GO:0043687,post-translational protein modification|GO:0044267,cellular protein metabolic process|GO:0060857,establishment of glial blood-brain barrier	GO:0003674,molecular_function	GO:0005788,endoplasmic reticulum lumen|GO:0009986,cell surface|GO:0016021,integral component of membrane|GO:0070062,extracellular exosome		0.0511779	0.0455475	0.0741771	0.0490672	0.0677824	0.131313	0.128961	0.0803591	0.182359	0.19139	0.286281	0.766363	0.457418	0.00023236	0.00374017	0.0336268
DMR_289	5	191242	191806	564	11	cg12711961,cg03553576,cg01239922,cg15351009,cg13787932,cg00607051,cg24814621,cg19858576,cg15730313,cg24696500,cg26866348	LRRC14B	TSS1500	Island=2,N_Shore=9					0.0601161	0.0582503	0.0741707	0.072365	0.0884548	0.177944	0.152048	0.112107	0.16539	0.190387	0.282663	0.631486	0.453889	0.00023236	0.00374017	0.0336268
DMR_290	3	46506104	46506864	760	14	cg00518878,cg26307117,cg25930780,cg27314002,cg16975587,cg15261665,cg17527798,cg12295918,cg00716083,cg02889400,cg04910591,cg03933131,cg21055126,cg10749572	LTF	TSS1500	Island=4,N_Shore=1,S_Shore=9	GO:0001503,ossification|GO:0001817,regulation of cytokine production|GO:0001895,retina homeostasis|GO:0002227,innate immune response in mucosa|GO:0006351,transcription, DNA-templated|GO:0006508,proteolysis|GO:0006811,ion transport|GO:0006959,humoral immune response|GO:0019730,antimicrobial humoral response|GO:0019731,antibacterial humoral response|GO:0019732,antifungal humoral response|GO:0031640…	GO:0001530,lipopolysaccharide binding|GO:0003677,DNA binding|GO:0004252,serine-type endopeptidase activity|GO:0004869,cysteine-type endopeptidase inhibitor activity|GO:0005506,iron ion binding|GO:0005515,protein binding|GO:0008201,heparin binding|GO:0043539,protein serine/threonine kinase activator activity	GO:0005576,extracellular region|GO:0005615,extracellular space|GO:0005634,nucleus|GO:0005737,cytoplasm|GO:0009986,cell surface|GO:0030141,secretory granule|GO:0035580,specific granule lumen|GO:0042581,specific granule|GO:0043234,protein complex|GO:0044218,other organism cell membrane|GO:0070062,extracellular exosome|GO:0097013,phagocytic vesicle lumen|GO:1904724,tertiary granule lumen		0.13424	0.108679	0.114318	0.132931	0.13832	0.231361	0.202642	0.196807	0.235447	0.23161	0.305641	0.764165	0.509577	0.000172119	0.00309059	0.0277866
DMR_291	11	2162475	2163808	1333	14	cg05323345,cg02425416,cg05777976,cg19131227,cg14895961,cg15168906,cg11701022,cg05203776,cg26719629,cg08014499,cg22225943,cg01368777,cg17300736,cg21237591	IGF2AS	Body	Island=3,N_Shore=5,S_Shore=6					0.596882	0.624968	0.603205	0.614471	0.673505	0.517886	0.517395	0.422232	0.427791	0.47084	1.03517	2.78502	1.40781	0.000172119	0.00309059	0.0277866
DMR_292	8	101661245	101662790	1545	13	cg07542096,cg06874326,cg14635466,cg23740378,cg24546463,cg17808631,cg25374359,cg17199658,cg18582180,cg27043726,cg13277380,cg10715223,cg04410446	SNX31	TSS1500	Island=4,N_Shore=3,S_Shore=6	GO:0006886,intracellular protein transport|GO:1990126,retrograde transport, endosome to plasma membrane	GO:0005515,protein binding|GO:0035091,phosphatidylinositol binding	GO:0005769,early endosome|GO:0043234,protein complex		0.279013	0.281778	0.275176	0.287469	0.279704	0.430377	0.400744	0.442228	0.413955	0.399888	0.454519	0.960238	0.602062	0.00018933	0.00330741	0.029736
DMR_293	4	4859772	4860551	779	16	cg03335246,cg15092343,cg03672274,cg20588069,cg13882284,cg19846622,cg18849102,cg07035659,cg10266211,cg24469464,cg07462756,cg00486340,cg14602530,cg13207326,cg21689228,cg04660422	MSX1,	TSS1500	Island=11,N_Shore=5	GO:0000122,negative regulation of transcription from RNA polymerase II promoter|GO:0000902,cell morphogenesis|GO:0001701,in utero embryonic development|GO:0003198,epithelial to mesenchymal transition involved in endocardial cushion formation|GO:0006366,transcription from RNA polymerase II promoter|GO:0007517,muscle organ development|GO:0008285,negative regulation of cell proliferation|GO:0009952,…	GO:0000977,RNA polymerase II regulatory region sequence-specific DNA binding|GO:0000982,transcription factor activity, RNA polymerase II proximal promoter sequence-specific DNA binding|GO:0001227,transcriptional repressor activity, RNA polymerase II transcription regulatory region sequence-specific DNA binding|GO:0001228,transcriptional activator activity, RNA polymerase II transcription regulato…	GO:0005634,nucleus|GO:0005654,nucleoplasm,	hsa05166 HTLV-I infection - Homo sapiens (human),	0.331891	0.313955	0.33867	0.302389	0.324499	0.521653	0.506418	0.512326	0.377893	0.379628	0.503151	1.03439	0.664675	0.000223754	0.00374017	0.0336268
DMR_294	17	27044629	27045548	919	16	cg27547165,cg08032476,cg01274742,cg21237418,cg22803868,cg26472572,cg18686527,cg06756709,cg19504123,cg08839210,cg03452174,cg21816330,cg02530437,cg02098463,cg04146591,cg19982230	NARR,RAB34	TSS1500	Island=9,N_Shore=4,S_Shore=3	,GO:0019882,antigen processing and presentation|GO:0032418,lysosome localization|GO:0043001,Golgi to plasma membrane protein transport|GO:0044351,macropinocytosis|GO:0072659,protein localization to plasma membrane|GO:0090382,phagosome maturation|GO:0090385,phagosome-lysosome fusion	,GO:0003924,GTPase activity|GO:0005515,protein binding|GO:0005525,GTP binding|GO:0017160,Ral GTPase binding|GO:0030742,GTP-dependent protein binding	,GO:0005794,Golgi apparatus|GO:0005795,Golgi stack|GO:0030670,phagocytic vesicle membrane|GO:0031982,vesicle|GO:0031985,Golgi cisterna|GO:0032587,ruffle membrane|GO:0045335,phagocytic vesicle|GO:0048471,perinuclear region of cytoplasm|GO:0070062,extracellular exosome		0.0399286	0.0388246	0.0415395	0.0390777	0.0412433	0.0681604	0.0628181	0.0476925	0.088538	0.0700924	0.236335	1.187	0.582042	0.000223754	0.00374017	0.0336268
DMR_295	11	2922334	2922852	518	9	cg15739881,cg25548316,cg05385260,cg02081198,cg07291601,cg10943932,cg12563184,cg09198782,cg24205453	SLC22A18AS	5'UTR	N_Shore=9	GO:0008150,biological_process	GO:0003674,molecular_function	GO:0005575,cellular_component		0.525042	0.430157	0.515827	0.514327	0.637017	0.758973	0.645969	0.665196	0.745763	0.754579	0.674548	0.843123	0.735459	0.000292601	0.00441055	0.039654
DMR_296	10	42862876	42863594	718	9	cg01485177,cg24714864,cg24598948,cg24527560,cg06833823,cg16449687,cg23026554,cg27119456,cg06739303	LOC441666	TSS200	Island=3,N_Shore=1,S_Shore=5					0.179079	0.127773	0.245365	0.094367	0.191599	0.0781554	0.064727	0.11019	0.0578466	0.10011	1.27268	3.94823	2.32705	0.000292601	0.00441055	0.039654
DMR_297	6	30174651	30175327	676	8	cg14799927,cg03084824,cg27136023,cg05850884,cg19714347,cg14971718,cg20345556,cg07523043	TRIM26	5'UTR	opensea=8	GO:0045087,innate immune response|GO:0046597,negative regulation of viral entry into host cell|GO:0051091,positive regulation of DNA binding transcription factor activity|GO:0060333,interferon-gamma-mediated signaling pathway|GO:1902187,negative regulation of viral release from host cell	GO:0003677,DNA binding|GO:0005515,protein binding|GO:0008270,zinc ion binding|GO:0016740,transferase activity|GO:0046872,metal ion binding	GO:0005575,cellular_component|GO:0005634,nucleus|GO:0005829,cytosol		0.101259	0.106355	0.148162	0.100492	0.138811	0.211928	0.206535	0.14567	0.284672	0.319143	0.293175	0.74665	0.463459	0.000335631	0.00487964	0.0438715
DMR_298	4	13536504	13537318	814	7	cg20171396,cg21514612,cg25781755,cg08036309,cg02373784,cg14144025,cg17023149		IGR	N_Shore=7					0.710251	0.803452	0.734623	0.7339	0.737243	0.585657	0.532798	0.588812	0.578739	0.519393	1.21051	1.45701	1.34146	0.000344237	0.00495679	0.0445651
DMR_299	17	5402883	5403805	922	7	cg27507261,cg23502639,cg15754901,cg15045292,cg15954353,cg00343839,cg16558432	LOC728392	3'UTR	Island=4,N_Shore=3					0.131099	0.109856	0.150019	0.116973	0.136269	0.353688	0.28315	0.21233	0.339318	0.237859	0.251201	0.777384	0.46881	0.000370055	0.00522833	0.0470064
DMR_300	4	184908510	184909018	508	9	cg13966557,cg18628646,cg13023014,cg06856555,cg09180181,cg00058887,cg20887363,cg15859390,cg02968918	STOX2	Body	opensea=9	GO:0001893,maternal placenta development|GO:0009790,embryo development	GO:0003674,molecular_function	GO:0005575,cellular_component		0.141858	0.140746	0.175325	0.143997	0.195011	0.252721	0.241543	0.180135	0.336897	0.380427	0.24326	0.895852	0.468774	0.000318419	0.0047053	0.042304
DMR_301	13	107354273	107354993	720	9	cg23101649,cg13930220,cg23762915,cg17464815,cg20630740,cg02444118,cg21727032,cg01281231,cg23568643		IGR	opensea=9					0.849394	0.834637	0.860733	0.871177	0.89026	0.698164	0.708789	0.684286	0.755908	0.823198	1.04853	1.28958	1.17599	0.000318419	0.0047053	0.042304
DMR_302	19	35630106	35630651	545	9	cg24168413,cg27461196,cg04425701,cg17540545,cg26501313,cg06743610,cg18503912,cg07780528,cg26764421	FXYD1	5'UTR	N_Shelf=5,N_Shore=4	GO:0006813,potassium ion transport|GO:0006814,sodium ion transport|GO:0006821,chloride transport|GO:0006936,muscle contraction|GO:0008016,regulation of heart contraction|GO:0010734,negative regulation of protein glutathionylation|GO:0034220,ion transmembrane transport|GO:0086036,regulation of cardiac muscle cell membrane potential|GO:1902476,chloride transmembrane transport|GO:1903278,positive re…	GO:0005254,chloride channel activity|GO:0017080,sodium channel regulator activity|GO:0017080,sodium channel regulator activity|GO:0044325,ion channel binding	GO:0005886,plasma membrane|GO:0005887,integral component of plasma membrane|GO:0005890,sodium:potassium-exchanging ATPase complex|GO:0005901,caveola|GO:0014704,intercalated disc|GO:0016324,apical plasma membrane|GO:0030315,T-tubule|GO:0042383,sarcolemma	hsa04024 cAMP signaling pathway - Homo sapiens (human)	0.0704498	0.0437519	0.0872985	0.062451	0.0864259	0.158349	0.149308	0.0856972	0.20245	0.21463	0.302718	0.495892	0.415379	0.000318419	0.0047053	0.042304
DMR_303	12	130821962	130822674	712	9	cg18319102,cg24229701,cg27630820,cg13861644,cg11931211,cg19424457,cg26677194,cg24838063,cg23887609	PIWIL1	TSS1500	Island=4,N_Shore=5	GO:0006417,regulation of translation|GO:0007275,multicellular organism development|GO:0007283,spermatogenesis|GO:0007286,spermatid development|GO:0007286,spermatid development|GO:0010529,negative regulation of transposition|GO:0031047,gene silencing by RNA|GO:0034587,piRNA metabolic process|GO:0035093,spermatogenesis, exchange of chromosomal proteins|GO:0051321,meiotic cell cycle|GO:0090502,RNA p…	GO:0003727,single-stranded RNA binding|GO:0003729,mRNA binding|GO:0004521,endoribonuclease activity|GO:0005515,protein binding|GO:0019901,protein kinase binding|GO:0034584,piRNA binding|GO:0046872,metal ion binding	GO:0005634,nucleus|GO:0005737,cytoplasm|GO:0005844,polysome|GO:0005845,mRNA cap binding complex|GO:0033391,chromatoid body|GO:0043186,P granule|GO:0097433,dense body	hsa04320 Dorso-ventral axis formation - Homo sapiens (human)	0.351535	0.500032	0.52698	0.351815	0.52252	0.622358	0.637283	0.673282	0.710383	0.784473	0.394191	0.849883	0.648224	0.000327025	0.00476991	0.0428849
DMR_304	11	47430776	47431593	817	8	cg13978690,cg14118690,cg12344459,cg05778943,cg12347781,cg26343633,cg19668951,cg18063878	SLC39A13	5'UTR	S_Shore=8	GO:0006882,cellular zinc ion homeostasis|GO:0006882,cellular zinc ion homeostasis|GO:0010043,response to zinc ion|GO:0061448,connective tissue development|GO:0071577,zinc II ion transmembrane transport|GO:0071577,zinc II ion transmembrane transport	GO:0005385,zinc ion transmembrane transporter activity|GO:0005385,zinc ion transmembrane transporter activity|GO:0005515,protein binding|GO:0042803,protein homodimerization activity	GO:0005783,endoplasmic reticulum|GO:0005794,Golgi apparatus|GO:0005794,Golgi apparatus|GO:0016021,integral component of membrane|GO:0030173,integral component of Golgi membrane|GO:0048471,perinuclear region of cytoplasm		0.0814897	0.0633243	0.100662	0.0816416	0.119614	0.145709	0.131754	0.0857015	0.210567	0.251213	0.255958	1.12425	0.470992	0.000361449	0.00513896	0.0462029
DMR_305	8	19459996	19460243	247	6	cg17470251,cg05800416,cg19895047,cg06386478,cg26286961,cg04066265	CSGALNACT1	TSS200	Island=3,S_Shore=3	GO:0001958,endochondral ossification|GO:0007399,nervous system development|GO:0008037,cell recognition|GO:0008283,cell proliferation|GO:0009653,anatomical structure morphogenesis|GO:0015014,heparan sulfate proteoglycan biosynthetic process, polysaccharide chain biosynthetic process|GO:0019276,UDP-N-acetylgalactosamine metabolic process|GO:0030166,proteoglycan biosynthetic process|GO:0030198,extra…	GO:0008376,acetylgalactosaminyltransferase activity|GO:0008376,acetylgalactosaminyltransferase activity|GO:0008955,peptidoglycan glycosyltransferase activity|GO:0015020,glucuronosyltransferase activity|GO:0046872,metal ion binding|GO:0047237,glucuronylgalactosylproteoglycan 4-beta-N-acetylgalactosaminyltransferase activity|GO:0047238,glucuronosyl-N-acetylgalactosaminyl-proteoglycan 4-beta-N-acety…	GO:0000139,Golgi membrane|GO:0005622,intracellular|GO:0030173,integral component of Golgi membrane|GO:0032580,Golgi cisterna membrane	hsa00532 Glycosaminoglycan biosynthesis - chondroitin sulfate / dermatan sulfate - Homo sapiens (human)|hsa01100 Metabolic pathways - Homo sapiens (human)	0.135358	0.0927635	0.151316	0.101421	0.136679	0.211994	0.242831	0.20826	0.272857	0.337157	0.290457	0.661926	0.466841	0.000395873	0.005473	0.0492062
DMR_306	22	41636917	41637354	437	5	cg11134054,cg19833679,cg11074301,cg22970173,cg16195245	CHADL	TSS1500	S_Shelf=5	GO:0032331,negative regulation of chondrocyte differentiation|GO:1904027,negative regulation of collagen fibril organization	GO:0005518,collagen binding|GO:0098633,collagen fibril binding	GO:0005578,proteinaceous extracellular matrix|GO:0031012,extracellular matrix|GO:0031012,extracellular matrix		0.231754	0.153933	0.256126	0.198525	0.25087	0.405411	0.363392	0.317131	0.468511	0.477793	0.312737	0.661745	0.497961	0.000413084	0.00564173	0.0507232
DMR_307	1	85527430	85527597	167	3	cg09755594,cg03604763,cg12062099	WDR63	TSS1500	opensea=3	GO:0007018,microtubule-based movement	GO:0008574,ATP-dependent microtubule motor activity, plus-end-directed|GO:0045503,dynein light chain binding|GO:0045504,dynein heavy chain binding	GO:0030286,dynein complex		0.279489	0.276273	0.299937	0.324431	0.419023	0.147472	0.128053	0.0961068	0.214338	0.256703	1.46483	2.48402	1.9588	0.00042169	0.00570738	0.0513134
DMR_308	11	64135650	64136263	613	12	cg04618331,cg12778580,cg22831978,cg02705752,cg27163061,cg13037081,cg04024822,cg02675260,cg22788485,cg25770702,cg20699960,cg14304022	RPS6KA4,MIR1237	TSS1500	Island=9,N_Shore=3	GO:0001818,negative regulation of cytokine production|GO:0006355,regulation of transcription, DNA-templated|GO:0006468,protein phosphorylation|GO:0006954,inflammatory response|GO:0016572,histone phosphorylation|GO:0032793,positive regulation of CREB transcription factor activity|GO:0033129,positive regulation of histone phosphorylation|GO:0035066,positive regulation of histone acetylation|GO:0035…	GO:0000287,magnesium ion binding|GO:0004674,protein serine/threonine kinase activity|GO:0004674,protein serine/threonine kinase activity|GO:0004711,ribosomal protein S6 kinase activity|GO:0005515,protein binding|GO:0005524,ATP binding,	GO:0005634,nucleus|GO:0005654,nucleoplasm|GO:0005737,cytoplasm|GO:0005829,cytosol,	hsa04010 MAPK signaling pathway - Homo sapiens (human)|hsa04668 TNF signaling pathway - Homo sapiens (human),	0.826171	0.781149	0.831388	0.789865	0.810371	0.901661	0.895375	0.896432	0.905364	0.894581	0.837365	0.990942	0.896983	0.000266784	0.00416053	0.0374062
DMR_309	1	205473048	205473677	629	9	cg18438591,cg26742436,cg18592026,cg07713493,cg06948937,cg16985301,cg07457613,cg03750111,cg17917542	CDK18	TSS1500	N_Shore=9	GO:0006468,protein phosphorylation	GO:0004693,cyclin-dependent protein serine/threonine kinase activity|GO:0005515,protein binding|GO:0005524,ATP binding	GO:0005575,cellular_component|GO:0005634,nucleus|GO:0005737,cytoplasm		0.288461	0.269916	0.318525	0.281085	0.34652	0.489113	0.395013	0.456206	0.489059	0.490215	0.266502	0.987601	0.677371	0.000344237	0.00495679	0.0445651
DMR_310	2	242448675	242449352	677	9	cg26679055,cg26570680,cg18997635,cg21144270,cg22119921,cg18256192,cg08129953,cg22068494,cg24655066	STK25	TSS1500	S_Shore=9	GO:0000165,MAPK cascade|GO:0000185,activation of MAPKKK activity|GO:0006468,protein phosphorylation|GO:0006979,response to oxidative stress|GO:0007163,establishment or maintenance of cell polarity|GO:0007165,signal transduction|GO:0007346,regulation of mitotic cell cycle|GO:0032874,positive regulation of stress-activated MAPK cascade|GO:0036481,intrinsic apoptotic signaling pathway in response to…	GO:0004672,protein kinase activity|GO:0005515,protein binding|GO:0005524,ATP binding|GO:0008349,MAP kinase kinase kinase kinase activity|GO:0042803,protein homodimerization activity|GO:0046872,metal ion binding	GO:0000139,Golgi membrane|GO:0005737,cytoplasm|GO:0005794,Golgi apparatus|GO:0070062,extracellular exosome		0.309141	0.305834	0.322304	0.321742	0.339112	0.441156	0.401757	0.420185	0.460495	0.491865	0.334501	1.00354	0.580134	0.000344237	0.00495679	0.0445651
DMR_311	1	103574204	103574619	415	6	cg03520644,cg06381931,cg16968885,cg00172849,cg05028472,cg26256793	COL11A1	TSS1500	opensea=6	GO:0001502,cartilage condensation|GO:0001503,ossification|GO:0002063,chondrocyte development|GO:0006029,proteoglycan metabolic process|GO:0007601,visual perception|GO:0007605,sensory perception of sound|GO:0030198,extracellular matrix organization|GO:0030199,collagen fibril organization|GO:0030574,collagen catabolic process|GO:0035987,endodermal cell differentiation|GO:0035989,tendon development|…	GO:0005201,extracellular matrix structural constituent|GO:0030674,protein binding, bridging|GO:0046872,metal ion binding|GO:0050840,extracellular matrix binding	GO:0005576,extracellular region|GO:0005592,collagen type XI trimer|GO:0005592,collagen type XI trimer|GO:0005615,extracellular space|GO:0005788,endoplasmic reticulum lumen	hsa04974 Protein digestion and absorption - Homo sapiens (human)	0.0326891	0.027446	0.0499362	0.0343234	0.0525326	0.101671	0.0875952	0.0498479	0.141937	0.158469	0.290513	0.631891	0.418361	0.00042169	0.00570738	0.0513134
DMR_312	6	32118204	32118457	253	12	cg08123207,cg00254681,cg19227031,cg22268510,cg05764839,cg11617964,cg15194163,cg13705391,cg12320039,cg05714552,cg21398794,cg25845985	PRRT1	Body	Island=12	GO:0009607,response to biotic stimulus		GO:0005886,plasma membrane|GO:0016020,membrane|GO:0016021,integral component of membrane|GO:0030054,cell junction|GO:0045202,synapse		0.168447	0.151795	0.17865	0.156779	0.191765	0.340826	0.295629	0.291263	0.314459	0.311269	0.336226	0.65311	0.51786	0.000283996	0.00436849	0.0392759
DMR_313	3	188664632	188665466	834	11	cg12307200,cg24376295,cg20116907,cg27396056,cg03176993,cg27409802,cg04252044,cg05134945,cg11675876,cg00084669,cg13548220	,TPRG1-AS1	TSS200	Island=5,N_Shore=6					0.0814376	0.0800038	0.0769052	0.0783039	0.0911703	0.112779	0.0893187	0.0861741	0.154924	0.146396	0.232165	1.39742	0.510606	0.000292601	0.00441055	0.039654
DMR_314	2	33359198	33359688	490	10	cg18213786,cg15877238,cg13652008,cg18850418,cg14102437,cg15135286,cg03906115,cg11918450,cg08357990,cg26795942	LTBP1	TSS1500	opensea=10	GO:0003281,ventricular septum development|GO:0007178,transmembrane receptor protein serine/threonine kinase signaling pathway|GO:0035583,sequestering of TGFbeta in extracellular matrix|GO:0035904,aorta development|GO:0043687,post-translational protein modification|GO:0044267,cellular protein metabolic process|GO:0060976,coronary vasculature development	GO:0005024,transforming growth factor beta-activated receptor activity|GO:0005509,calcium ion binding|GO:0005515,protein binding|GO:0050431,transforming growth factor beta binding|GO:0050436,microfibril binding	GO:0001527,microfibril|GO:0005576,extracellular region|GO:0005576,extracellular region|GO:0005578,proteinaceous extracellular matrix|GO:0005615,extracellular space|GO:0005788,endoplasmic reticulum lumen|GO:0031012,extracellular matrix|GO:0031012,extracellular matrix|GO:0043234,protein complex	hsa04350 TGF-beta signaling pathway - Homo sapiens (human)	0.0495541	0.0399622	0.0662026	0.0459892	0.0675934	0.140083	0.116673	0.0697253	0.165857	0.169759	0.213097	0.874689	0.42282	0.000327025	0.00476991	0.0428849
DMR_315	6	123100189	123100726	537	8	cg24123106,cg09395550,cg19429318,cg16018314,cg21020855,cg19097322,cg14805728,cg15042332	FABP7	TSS1500	opensea=8	GO:0006810,transport|GO:0007399,nervous system development|GO:0008285,negative regulation of cell proliferation|GO:0019433,triglyceride catabolic process|GO:0021846,cell proliferation in forebrain|GO:0022008,neurogenesis|GO:0050673,epithelial cell proliferation|GO:0060134,prepulse inhibition	GO:0005215,transporter activity|GO:0008289,lipid binding	GO:0005654,nucleoplasm|GO:0005829,cytosol|GO:0005829,cytosol|GO:0005911,cell-cell junction|GO:0042995,cell projection|GO:0043025,neuronal cell body|GO:0071944,cell periphery	hsa03320 PPAR signaling pathway - Homo sapiens (human)	0.190375	0.200554	0.213742	0.220098	0.247015	0.371086	0.327571	0.320727	0.420737	0.444592	0.337011	0.843034	0.511736	0.000387267	0.00540375	0.0485836
DMR_316	19	14196219	14196803	584	8	cg09379609,cg09425032,cg02484774,cg09796101,cg10584766,cg11352369,cg25937382,cg23259973	C19orf67,	TSS200	Island=4,N_Shore=1,S_Shore=3					0.284529	0.242836	0.296571	0.294676	0.33324	0.538391	0.472362	0.490429	0.518381	0.562332	0.360713	0.770093	0.544374	0.000404479	0.00554099	0.0498174
DMR_317	7	116594536	116595196	660	6	cg25605754,cg21273878,cg07240880,cg15394626,cg19801025,cg02436796	ST7,ST7-OT4	Body	S_Shore=6			GO:0016021,integral component of membrane,		0.173644	0.14512	0.162236	0.167349	0.183782	0.245719	0.230059	0.213738	0.263373	0.266485	0.315062	1.58878	0.81919	0.000430296	0.00578909	0.0520481
DMR_318	11	2160875	2161586	711	24	cg16415340,cg10659464,cg19371526,cg19002337,cg09694722,cg23905216,cg26517849,cg11915650,cg13756879,cg21667878,cg24917382,cg25163476,cg15393937,cg05859777,cg19443075,cg17434309,cg01667319,cg10037494,cg05452899,cg14188639,cg24366657,cg22287492,cg20339650,cg03760951	INS-IGF2	Body	Island=24	GO:0010469,regulation of receptor activity	GO:0005179,hormone activity	GO:0005576,extracellular region		0.139906	0.0877085	0.124264	0.105701	0.144153	0.0866565	0.0794052	0.0506604	0.0687228	0.07691	1.19315	2.38999	1.6564	0.00023236	0.00374017	0.0336268
DMR_319	5	112824497	112825266	769	10	cg25956344,cg18121164,cg13531667,cg12855547,cg18360579,cg19733633,cg21806985,cg08759041,cg24539599,cg08305057	MCC	TSS1500	S_Shore=10	GO:0007165,signal transduction|GO:0010633,negative regulation of epithelial cell migration|GO:0016055,Wnt signaling pathway|GO:0045184,establishment of protein localization|GO:0050680,negative regulation of epithelial cell proliferation|GO:0090090,negative regulation of canonical Wnt signaling pathway|GO:0090090,negative regulation of canonical Wnt signaling pathway	GO:0004872,receptor activity|GO:0005515,protein binding	GO:0005634,nucleus|GO:0005654,nucleoplasm|GO:0005737,cytoplasm|GO:0005829,cytosol|GO:0005886,plasma membrane|GO:0030027,lamellipodium		0.0517518	0.0406461	0.0646408	0.0420954	0.0579521	0.0885208	0.0691688	0.0525401	0.131183	0.128111	0.197105	1.47442	0.51513	0.000352843	0.00504845	0.0453892
DMR_320	5	2753746	2754322	576	10	cg02509058,cg04509074,cg26932441,cg18693345,cg27144115,cg12824782,cg10958362,cg18652721,cg12860686,cg13944468	C5orf38	Body	Island=10			GO:0005576,extracellular region		0.337104	0.126399	0.189802	0.344124	0.233401	0.467058	0.353083	0.448127	0.475727	0.407037	0.420916	0.687562	0.562212	0.000352843	0.00504845	0.0453892
DMR_321	7	116592956	116593113	157	4	cg15730857,cg10661163,cg14896463,cg04673912	ST7OT4	TSS1500	N_Shore=4					0.0384919	0.0317277	0.0505503	0.0368802	0.05215	0.149386	0.11978	0.0856717	0.133241	0.136446	0.230236	0.759244	0.462252	0.000481932	0.00631415	0.0567687
DMR_322	17	77924582	77924774	192	4	cg17295878,cg23651872,cg25798632,cg07618085	TBC1D16	TSS200	S_Shore=4	GO:0001919,regulation of receptor recycling|GO:0006886,intracellular protein transport|GO:0031338,regulation of vesicle fusion|GO:0090630,activation of GTPase activity|GO:1902017,regulation of cilium assembly	GO:0005096,GTPase activator activity|GO:0005515,protein binding|GO:0017137,Rab GTPase binding	GO:0005769,early endosome|GO:0005829,cytosol		0.59162	0.445975	0.580244	0.53534	0.584103	0.800047	0.69374	0.796495	0.784713	0.769377	0.615342	0.912443	0.702413	0.000481932	0.00631415	0.0567687
DMR_323	19	41119278	41119859	581	10	cg14229540,cg27645259,cg26029864,cg27129881,cg06732228,cg23143632,cg21944491,cg03309253,cg19597227,cg10178836	LTBP4	Body	Island=10	GO:0001558,regulation of cell growth|GO:0006457,protein folding|GO:0007179,transforming growth factor beta receptor signaling pathway|GO:0007275,multicellular organism development|GO:0017015,regulation of transforming growth factor beta receptor signaling pathway|GO:0030162,regulation of proteolysis|GO:0030252,growth hormone secretion|GO:0045595,regulation of cell differentiation	GO:0005024,transforming growth factor beta-activated receptor activity|GO:0005178,integrin binding|GO:0005509,calcium ion binding|GO:0005515,protein binding|GO:0005539,glycosaminoglycan binding|GO:0050431,transforming growth factor beta binding|GO:0050431,transforming growth factor beta binding	GO:0005576,extracellular region|GO:0005576,extracellular region|GO:0005578,proteinaceous extracellular matrix|GO:0005615,extracellular space|GO:0031012,extracellular matrix|GO:0031012,extracellular matrix|GO:0070062,extracellular exosome		0.0853191	0.052689	0.0663188	0.0765824	0.0733414	0.160996	0.172492	0.163762	0.132725	0.155223	0.280066	0.837107	0.471233	0.000378661	0.0053332	0.0479493
DMR_324	8	144120106	144120681	575	9	cg21015266,cg00002224,cg08795786,cg07770222,cg03029255,cg03058664,cg22829325,cg08540654,cg22915785	C8orf31	TSS1500	opensea=9					0.0619914	0.0606881	0.0817539	0.0667713	0.0871537	0.139228	0.132124	0.0794063	0.214215	0.220072	0.252421	0.70955	0.42449	0.000387267	0.00540375	0.0485836
DMR_325	1	20878361	20878811	450	7	cg04241844,cg10778636,cg15742063,cg26557658,cg15142222,cg19507093,cg04309384	FAM43B	TSS1500	N_Shore=7					0.0754371	0.073362	0.0952214	0.0881067	0.109181	0.187876	0.167315	0.151662	0.171844	0.203849	0.200639	0.917885	0.541019	0.00046472	0.00612425	0.0550614
DMR_326	6	134498979	134499419	440	6	cg09404376,cg02904344,cg24422188,cg14905466,cg26614943,cg03762694	SGK1	TSS1500	S_Shore=6	GO:0001558,regulation of cell growth|GO:0006468,protein phosphorylation|GO:0006814,sodium ion transport|GO:0006915,apoptotic process|GO:0006950,response to stress|GO:0006974,cellular response to DNA damage stimulus|GO:0007616,long-term memory|GO:0008217,regulation of blood pressure|GO:0018105,peptidyl-serine phosphorylation|GO:0030334,regulation of cell migration|GO:0032411,positive regulation of…	GO:0004674,protein serine/threonine kinase activity|GO:0004674,protein serine/threonine kinase activity|GO:0004712,protein serine/threonine/tyrosine kinase activity|GO:0005246,calcium channel regulator activity|GO:0005515,protein binding|GO:0005524,ATP binding|GO:0015459,potassium channel regulator activity|GO:0017080,sodium channel regulator activity|GO:0017081,chloride channel regulator activity	GO:0005634,nucleus|GO:0005737,cytoplasm|GO:0005739,mitochondrion|GO:0005789,endoplasmic reticulum membrane|GO:0005829,cytosol|GO:0005829,cytosol|GO:0005886,plasma membrane|GO:0016607,nuclear speck	hsa04068 FoxO signaling pathway - Homo sapiens (human)|hsa04150 mTOR signaling pathway - Homo sapiens (human)|hsa04151 PI3K-Akt signaling pathway - Homo sapiens (human)|hsa04960 Aldosterone-regulated sodium reabsorption - Homo sapiens (human)	0.199379	0.26555	0.241877	0.258749	0.344497	0.0833551	0.0727761	0.0552381	0.119541	0.158356	1.27441	4.36536	2.54207	0.000447508	0.00598492	0.0538087
DMR_327	4	38111373	38111786	413	6	cg04939244,cg27414132,cg16935947,cg05058787,cg06331663,cg17976489	TBC1D1	TSS1500	opensea=6	GO:0006886,intracellular protein transport|GO:0031338,regulation of vesicle fusion|GO:0032880,regulation of protein localization|GO:0061024,membrane organization|GO:0090630,activation of GTPase activity|GO:1902017,regulation of cilium assembly	GO:0005096,GTPase activator activity|GO:0005515,protein binding|GO:0017137,Rab GTPase binding	GO:0005622,intracellular|GO:0005634,nucleus|GO:0005829,cytosol|GO:0012505,endomembrane system	hsa04152 AMPK signaling pathway - Homo sapiens (human)	0.63944	0.678294	0.67391	0.589224	0.588785	0.767148	0.788899	0.804056	0.778899	0.767657	0.749366	0.971546	0.821331	0.00046472	0.00612425	0.0550614
DMR_328	7	123240919	123241407	488	4	cg13643794,cg12337416,cg20633716,cg07068054	NDUFA5	5'UTR	opensea=4	GO:0006120,mitochondrial electron transport, NADH to ubiquinone|GO:0006120,mitochondrial electron transport, NADH to ubiquinone|GO:0032981,mitochondrial respiratory chain complex I assembly|GO:0032981,mitochondrial respiratory chain complex I assembly	GO:0005515,protein binding|GO:0008137,NADH dehydrogenase (ubiquinone) activity	GO:0005743,mitochondrial inner membrane|GO:0005747,mitochondrial respiratory chain complex I|GO:0005747,mitochondrial respiratory chain complex I	hsa00190 Oxidative phosphorylation - Homo sapiens (human)|hsa01100 Metabolic pathways - Homo sapiens (human)|hsa04723 Retrograde endocannabinoid signaling - Homo sapiens (human)|hsa04932 Non-alcoholic fatty liver disease (NAFLD) - Homo sapiens (human)|hsa05010 Alzheimer's disease - Homo sapiens (human)|hsa05012 Parkinson's disease - Homo sapiens (human)|hsa05016 Huntington's disease - Homo sapien…	0.750659	0.778309	0.787513	0.806088	0.826929	0.77949	0.739408	0.73783	0.811155	0.846843	0.574728	1.17506	0.982784	0.000499144	0.00642754	0.0577882
DMR_329	2	201170198	201170426	228	4	cg06905367,cg05691004,cg25753595,cg17141237	SPATS2L	TSS1500	N_Shore=4		GO:0003723,RNA binding	GO:0005634,nucleus|GO:0005730,nucleolus|GO:0005829,cytosol|GO:0043234,protein complex		0.352999	0.415284	0.419764	0.455034	0.525078	0.786546	0.676481	0.626059	0.697516	0.707764	0.307572	0.85793	0.569079	0.00050775	0.00651974	0.0586171
DMR_330	18	19285336	19285674	338	3	cg03433155,cg19164487,cg03393602	ABHD3	TSS1500	S_Shore=3	GO:0006656,phosphatidylcholine biosynthetic process|GO:0046470,phosphatidylcholine metabolic process	GO:0004623,phospholipase A2 activity|GO:0008970,phosphatidylcholine 1-acylhydrolase activity|GO:0008970,phosphatidylcholine 1-acylhydrolase activity|GO:0052739,phosphatidylserine 1-acylhydrolase activity|GO:0052740,1-acyl-2-lysophosphatidylserine acylhydrolase activity|GO:0102567,phospholipase A2 activity (consuming 1,2-dipalmitoylphosphatidylcholine)|GO:0102568,phospholipase A2 activity consumin…	GO:0005575,cellular_component|GO:0005886,plasma membrane|GO:0016021,integral component of membrane		0.253785	0.275211	0.288584	0.299235	0.351464	0.414314	0.325781	0.341068	0.460899	0.467353	0.369268	1.36326	0.754522	0.000542173	0.00667644	0.0600259
DMR_331	7	18534294	18535499	1205	10	cg11321459,cg25620356,cg08146609,cg19585556,cg00332048,cg08488089,cg08285151,cg12081743,cg22466394,cg12082702	HDAC9	TSS1500	opensea=10	GO:0000122,negative regulation of transcription from RNA polymerase II promoter|GO:0001975,response to amphetamine|GO:0006351,transcription, DNA-templated|GO:0006954,inflammatory response|GO:0007507,heart development|GO:0016575,histone deacetylation|GO:0030182,neuron differentiation|GO:0030183,B cell differentiation|GO:0032869,cellular response to insulin stimulus|GO:0034983,peptidyl-lysine deace…	GO:0003714,transcription corepressor activity|GO:0004407,histone deacetylase activity|GO:0005080,protein kinase C binding|GO:0005515,protein binding|GO:0008134,transcription factor binding|GO:0008134,transcription factor binding|GO:0032041,NAD-dependent histone deacetylase activity (H3-K14 specific)|GO:0033558,protein deacetylase activity|GO:0042826,histone deacetylase binding|GO:0046872,metal io…	GO:0000118,histone deacetylase complex|GO:0005634,nucleus|GO:0005654,nucleoplasm|GO:0005667,transcription factor complex|GO:0005737,cytoplasm|GO:0005737,cytoplasm|GO:0035097,histone methyltransferase complex	hsa05034 Alcoholism - Homo sapiens (human)|hsa05203 Viral carcinogenesis - Homo sapiens (human)	0.365392	0.366198	0.344255	0.404352	0.393758	0.271898	0.262483	0.26177	0.307386	0.311217	0.555701	6.45127	2.72702	0.000387267	0.00540375	0.0485836
DMR_332	13	36050522	36051073	551	10	cg12029639,cg12573705,cg05093686,cg01952313,cg13446906,cg15259593,cg12178237,cg15561647,cg22855860,cg03014934	MIR548F5,MAB21L1	Body	N_Shore=9,S_Shore=1	,GO:0008284,positive regulation of cell proliferation|GO:0009653,anatomical structure morphogenesis|GO:0043010,camera-type eye development	,GO:0005515,protein binding|GO:0005524,ATP binding|GO:0005525,GTP binding|GO:0016779,nucleotidyltransferase activity|GO:0046872,metal ion binding	,GO:0005634,nucleus		0.419966	0.369728	0.454629	0.421533	0.499499	0.193938	0.173184	0.222892	0.298567	0.344135	1.48943	2.00443	1.77677	0.000395873	0.005473	0.0492062
DMR_333	7	73507241	73507610	369	7	cg12430981,cg00941595,cg21665288,cg18995667,cg12734267,cg23078220,cg02678243	LIMK1	TSS1500	opensea=7	GO:0006468,protein phosphorylation|GO:0006468,protein phosphorylation|GO:0007165,signal transduction|GO:0007266,Rho protein signal transduction|GO:0007399,nervous system development|GO:0030036,actin cytoskeleton organization|GO:0032233,positive regulation of actin filament bundle assembly|GO:0038096,Fc-gamma receptor signaling pathway involved in phagocytosis|GO:0045773,positive regulation of axo…	GO:0004672,protein kinase activity|GO:0004674,protein serine/threonine kinase activity|GO:0004674,protein serine/threonine kinase activity|GO:0004871,signal transducer activity|GO:0005515,protein binding|GO:0005524,ATP binding|GO:0031072,heat shock protein binding|GO:0046872,metal ion binding|GO:0046982,protein heterodimerization activity	GO:0005634,nucleus|GO:0005737,cytoplasm|GO:0005794,Golgi apparatus|GO:0005829,cytosol|GO:0005829,cytosol|GO:0005925,focal adhesion|GO:0016020,membrane|GO:0016607,nuclear speck|GO:0030027,lamellipodium|GO:0043005,neuron projection|GO:0043005,neuron projection	hsa04360 Axon guidance - Homo sapiens (human)|hsa04666 Fc gamma R-mediated phagocytosis - Homo sapiens (human)|hsa04810 Regulation of actin cytoskeleton - Homo sapiens (human)	0.430685	0.476969	0.458454	0.48744	0.55393	0.287402	0.231196	0.228082	0.305452	0.32666	1.44399	2.71176	1.91283	0.000490538	0.00635303	0.0571183
DMR_334	8	120685124	120686025	901	7	cg27648238,cg09313482,cg27310831,cg10519935,cg10799440,cg11933900,cg07651720		IGR	opensea=7					0.316839	0.271285	0.351481	0.298265	0.388697	0.496391	0.431623	0.441866	0.555447	0.595786	0.339829	0.937542	0.567354	0.000499144	0.00642754	0.0577882
DMR_335	1	39407387	39407851	464	6	cg02910281,cg23257461,cg25314315,cg10500653,cg20088882,cg08209422	RHBDL2	TSS1500	opensea=6	GO:0016485,protein processing	GO:0004252,serine-type endopeptidase activity	GO:0005886,plasma membrane|GO:0016021,integral component of membrane		0.147567	0.11117	0.177465	0.122575	0.151021	0.253117	0.265556	0.200219	0.328598	0.341071	0.316284	0.725973	0.453687	0.000490538	0.00635303	0.0571183
DMR_336	7	75624427	75624848	421	5	cg17367518,cg03214087,cg15507475,cg06293365,cg04610184	TMEM120A	TSS1500	S_Shore=5	GO:0045444,fat cell differentiation|GO:0051260,protein homooligomerization|GO:0051291,protein heterooligomerization	GO:0003674,molecular_function	GO:0005575,cellular_component|GO:0005637,nuclear inner membrane|GO:0016020,membrane|GO:0016021,integral component of membrane		0.25961	0.231263	0.269298	0.253295	0.273428	0.356465	0.346784	0.287055	0.433918	0.45978	0.252415	0.986701	0.470888	0.000490538	0.00635303	0.0571183
DMR_337	17	38084119	38084581	462	5	cg10444806,cg04308185,cg08932654,cg15942003,cg19511844	ORMDL3	TSS1500	S_Shore=5	GO:0006672,ceramide metabolic process|GO:0043312,neutrophil degranulation|GO:0090156,cellular sphingolipid homeostasis|GO:1900060,negative regulation of ceramide biosynthetic process	GO:0005515,protein binding	GO:0005783,endoplasmic reticulum|GO:0005886,plasma membrane|GO:0016021,integral component of membrane|GO:0030667,secretory granule membrane|GO:0035339,SPOTS complex|GO:0035579,specific granule membrane		0.0602316	0.0417308	0.0687293	0.047955	0.0625407	0.133041	0.142559	0.0933603	0.189911	0.194698	0.26741	0.6911	0.433922	0.000516356	0.00653592	0.0587625
DMR_338	17	46696848	46697700	852	5	cg23349301,cg17873048,cg27217474,cg19051015,cg11916219		IGR	Island=4,N_Shore=1					0.0805987	0.0606996	0.0985466	0.0715595	0.0878757	0.178839	0.167973	0.132827	0.230051	0.247371	0.332378	1.32958	0.577264	0.000524961	0.00653592	0.0587625
DMR_339	17	800717	800761	44	4	cg17646030,cg14235846,cg23749637,cg08190450	NXN	Body	opensea=4	GO:0016055,Wnt signaling pathway|GO:0030154,cell differentiation|GO:0030178,negative regulation of Wnt signaling pathway|GO:0031397,negative regulation of protein ubiquitination|GO:0045454,cell redox homeostasis|GO:0055114,oxidation-reduction process|GO:0072358,cardiovascular system development|GO:0098869,cellular oxidant detoxification	GO:0004791,thioredoxin-disulfide reductase activity|GO:0047134,protein-disulfide reductase activity	GO:0005634,nucleus|GO:0005737,cytoplasm|GO:0005829,cytosol		0.841013	0.861357	0.842632	0.86263	0.89747	0.787601	0.756237	0.79208	0.692708	0.752316	1.09603	1.23664	1.14355	0.000524961	0.00653592	0.0587625
DMR_340	5	65439309	65439580	271	3	cg02115294,cg00020405,cg23438810	SREK1,SFRS12	TSS1500	N_Shore=3	GO:0000381,regulation of alternative mRNA splicing, via spliceosome|GO:0006397,mRNA processing|GO:0008380,RNA splicing,	GO:0003723,RNA binding|GO:0005515,protein binding,	GO:0005654,nucleoplasm|GO:0005681,spliceosomal complex|GO:0016607,nuclear speck,		0.174102	0.17335	0.183246	0.179452	0.194654	0.31932	0.289196	0.290568	0.306288	0.297218	0.432349	0.618631	0.524918	0.000559385	0.00677728	0.0609326
DMR_341	12	47219626	47220197	571	13	cg18064171,cg07102229,cg14671384,cg15584813,cg21428710,cg11331445,cg11146691,cg04094478,cg17501823,cg04053798,cg07601320,cg26127231,cg11177839	SLC38A4	TSS1500	opensea=13	GO:0003333,amino acid transmembrane transport|GO:0006814,sodium ion transport|GO:0006865,amino acid transport	GO:0015171,amino acid transmembrane transporter activity|GO:0015171,amino acid transmembrane transporter activity|GO:0015293,symporter activity	GO:0005886,plasma membrane|GO:0005887,integral component of plasma membrane		0.481532	0.528238	0.511675	0.506597	0.584737	0.31503	0.398789	0.305315	0.356672	0.471882	1.02191	2.11785	1.60713	0.000309813	0.00463897	0.0417076
DMR_342	3	49459591	49460177	586	10	cg05924489,cg02251567,cg25021247,cg17877071,cg21926782,cg00032956,cg20191453,cg18410166,cg14184400,cg15246085	AMT	TSS200	opensea=10	GO:0006546,glycine catabolic process|GO:0019464,glycine decarboxylation via glycine cleavage system|GO:0032259,methylation	GO:0004047,aminomethyltransferase activity|GO:0004047,aminomethyltransferase activity|GO:0008483,transaminase activity	GO:0005654,nucleoplasm|GO:0005739,mitochondrion|GO:0005739,mitochondrion|GO:0005759,mitochondrial matrix	hsa00260 Glycine, serine and threonine metabolism - Homo sapiens (human)|hsa00630 Glyoxylate and dicarboxylate metabolism - Homo sapiens (human)|hsa00670 One carbon pool by folate - Homo sapiens (human)|hsa01100 Metabolic pathways - Homo sapiens (human)|hsa01200 Carbon metabolism - Homo sapiens (human)	0.20725	0.16121	0.202848	0.199707	0.218852	0.433498	0.352657	0.381913	0.361805	0.356248	0.354429	0.685118	0.50728	0.000430296	0.00578909	0.0520481
DMR_343	14	101122999	101123682	683	8	cg03659476,cg23528142,cg19741273,cg16381321,cg23525541,cg23954066,cg16391347,cg14109844	C14orf70,LINC00523	TSS1500	S_Shelf=5,S_Shore=3					0.891056	0.909027	0.904644	0.908066	0.928367	0.822909	0.797497	0.758827	0.830881	0.844328	1.00753	1.27453	1.12997	0.000490538	0.00635303	0.0571183
DMR_344	10	89418800	89419292	492	6	cg01868499,cg10377144,cg13926569,cg21542146,cg15575238,cg26477576	PAPSS2	TSS1500	N_Shore=6	GO:0000103,sulfate assimilation|GO:0000103,sulfate assimilation|GO:0001501,skeletal system development|GO:0007596,blood coagulation|GO:0016310,phosphorylation|GO:0050428,3'-phosphoadenosine 5'-phosphosulfate biosynthetic process|GO:0050428,3'-phosphoadenosine 5'-phosphosulfate biosynthetic process|GO:0060348,bone development	GO:0004020,adenylylsulfate kinase activity|GO:0004020,adenylylsulfate kinase activity|GO:0004781,sulfate adenylyltransferase (ATP) activity|GO:0004781,sulfate adenylyltransferase (ATP) activity|GO:0005524,ATP binding|GO:0016779,nucleotidyltransferase activity	GO:0005829,cytosol	hsa00230 Purine metabolism - Homo sapiens (human)|hsa00450 Selenocompound metabolism - Homo sapiens (human)|hsa00920 Sulfur metabolism - Homo sapiens (human)|hsa01100 Metabolic pathways - Homo sapiens (human)	0.141912	0.151178	0.179747	0.169937	0.236816	0.354504	0.293441	0.258836	0.372815	0.439977	0.205409	0.685773	0.412415	0.000516356	0.00653592	0.0587625
DMR_345	3	152017017	152017293	276	3	cg19078289,cg13702222,cg09219813	MBNL1	TSS200	opensea=3	GO:0001701,in utero embryonic development|GO:0006397,mRNA processing|GO:0007399,nervous system development|GO:0008380,RNA splicing|GO:0030326,embryonic limb morphogenesis|GO:0043484,regulation of RNA splicing|GO:0045445,myoblast differentiation	GO:0001069,regulatory region RNA binding|GO:0003723,RNA binding|GO:0003725,double-stranded RNA binding|GO:0005515,protein binding|GO:0046872,metal ion binding	GO:0005634,nucleus|GO:0005654,nucleoplasm|GO:0005737,cytoplasm|GO:0005813,centrosome|GO:0005829,cytosol|GO:0010494,cytoplasmic stress granule		0.0212129	0.0208696	0.0258478	0.0248308	0.0311529	0.0718026	0.0662322	0.0386546	0.0902673	0.0965573	0.282381	0.785583	0.452916	0.000585203	0.00695913	0.0625675
DMR_346	15	63795662	63796130	468	3	cg04352505,cg24679423,cg04245873	USP3	TSS1500	Island=1,N_Shore=2	GO:0000122,negative regulation of transcription from RNA polymerase II promoter|GO:0000278,mitotic cell cycle|GO:0006281,DNA repair|GO:0006355,regulation of transcription, DNA-templated|GO:0006511,ubiquitin-dependent protein catabolic process|GO:0016578,histone deubiquitination|GO:0016579,protein deubiquitination|GO:0031647,regulation of protein stability	GO:0001046,core promoter sequence-specific DNA binding|GO:0003682,chromatin binding|GO:0004843,thiol-dependent ubiquitin-specific protease activity|GO:0008270,zinc ion binding|GO:0036459,thiol-dependent ubiquitinyl hydrolase activity|GO:0042393,histone binding	GO:0000790,nuclear chromatin|GO:0005634,nucleus|GO:0005654,nucleoplasm|GO:0005654,nucleoplasm|GO:0090543,Flemming body		0.0590994	0.0820612	0.0749378	0.0898958	0.13447	0.0187199	0.0172252	0.0156124	0.0183461	0.0394442	0.74003	5.42003	3.29584	0.000602415	0.00701572	0.0630763
DMR_347	2	69001624	69002378	754	15	cg04905448,cg12093662,cg27278086,cg13339825,cg26238936,cg24204210,cg15361661,cg17661906,cg03654451,cg05395210,cg23801982,cg08991742,cg07780630,cg25070482,cg25039325	ARHGAP25	TSS1500	opensea=15	GO:0006911,phagocytosis, engulfment|GO:0007015,actin filament organization|GO:0007165,signal transduction|GO:0043547,positive regulation of GTPase activity|GO:0051056,regulation of small GTPase mediated signal transduction|GO:0051058,negative regulation of small GTPase mediated signal transduction	GO:0005096,GTPase activator activity	GO:0001891,phagocytic cup|GO:0005829,cytosol		0.747166	0.791569	0.742324	0.782414	0.779205	0.66791	0.634172	0.66057	0.624657	0.612224	1.06071	1.29494	1.20919	0.000266784	0.00416053	0.0374062
DMR_348	3	55517101	55518396	1295	11	cg20746482,cg17679453,cg03588998,cg12433302,cg02867696,cg08852968,cg01777121,cg04941246,cg18010752,cg27364162,cg24216596	WNT5A	Body	Island=3,N_Shore=8	GO:0000187,activation of MAPK activity|GO:0001736,establishment of planar polarity|GO:0001756,somitogenesis|GO:0001837,epithelial to mesenchymal transition|GO:0001938,positive regulation of endothelial cell proliferation|GO:0001947,heart looping|GO:0002053,positive regulation of mesenchymal cell proliferation|GO:0002088,lens development in camera-type eye|GO:0002741,positive regulation of cytokin…	GO:0003700,DNA binding transcription factor activity|GO:0005109,frizzled binding|GO:0005110,frizzled-2 binding|GO:0005115,receptor tyrosine kinase-like orphan receptor binding|GO:0005125,cytokine activity|GO:0005515,protein binding|GO:0019904,protein domain specific binding|GO:0044212,transcription regulatory region DNA binding|GO:0048018,receptor ligand activity|GO:1902379,chemoattractant activi…	GO:0005576,extracellular region|GO:0005578,proteinaceous extracellular matrix|GO:0005615,extracellular space|GO:0005788,endoplasmic reticulum lumen|GO:0005796,Golgi lumen|GO:0005886,plasma membrane|GO:0009986,cell surface|GO:0030665,clathrin-coated vesicle membrane|GO:0030666,endocytic vesicle membrane|GO:0030669,clathrin-coated endocytic vesicle membrane|GO:0070062,extracellular exosome	hsa04150 mTOR signaling pathway - Homo sapiens (human)|hsa04310 Wnt signaling pathway - Homo sapiens (human)|hsa04360 Axon guidance - Homo sapiens (human)|hsa04390 Hippo signaling pathway - Homo sapiens (human)|hsa04550 Signaling pathways regulating pluripotency of stem cells - Homo sapiens (human)|hsa04916 Melanogenesis - Homo sapiens (human)|hsa05166 HTLV-I infection - Homo sapiens (human)|hsa0…	0.568165	0.633743	0.609605	0.555779	0.57205	0.802092	0.742327	0.826828	0.747361	0.671925	0.641478	0.937007	0.769949	0.000370055	0.00522833	0.0470064
DMR_349	4	13538730	13539598	868	9	cg06346388,cg21581745,cg27488824,cg13842240,cg18083114,cg07628428,cg18629151,cg01106926,cg18609078		IGR	S_Shore=9					0.737137	0.790713	0.756065	0.728785	0.743316	0.613461	0.590004	0.669732	0.585868	0.571676	1.1218	1.34229	1.24377	0.00046472	0.00612425	0.0550614
DMR_350	11	2925439	2925847	408	8	cg06048910,cg06495763,cg24724917,cg14101500,cg22833478,cg02390725,cg26137286,cg20716202	SLC22A18	Body	S_Shelf=1,S_Shore=7	GO:0006855,drug transmembrane transport|GO:0007588,excretion|GO:0015695,organic cation transport|GO:0015893,drug transport|GO:0046618,drug export	GO:0015238,drug transmembrane transporter activity|GO:0015293,symporter activity|GO:0015307,drug:proton antiporter activity|GO:0031625,ubiquitin protein ligase binding	GO:0005635,nuclear envelope|GO:0005737,cytoplasm|GO:0005886,plasma membrane|GO:0016020,membrane|GO:0016021,integral component of membrane|GO:0016324,apical plasma membrane		0.22966	0.15004	0.196623	0.195272	0.229758	0.326235	0.306908	0.259226	0.355443	0.415385	0.300349	0.93652	0.532284	0.000516356	0.00653592	0.0587625
DMR_351	6	21666778	21667407	629	6	cg26158950,cg06341027,cg08233811,cg01334682,cg00641409,cg12347429	FLJ22536	Body	Island=2,S_Shore=4					0.199295	0.289085	0.216683	0.218462	0.223849	0.0786995	0.120465	0.0655822	0.0805999	0.0837591	1.20501	3.82446	2.39513	0.000524961	0.00653592	0.0587625
DMR_352	11	63828346	63828762	416	5	cg01566127,cg03103218,cg09908110,cg22796860,cg18403673	MACROD1	Body	opensea=5	GO:0006974,cellular response to DNA damage stimulus|GO:0042278,purine nucleoside metabolic process|GO:0051725,protein de-ADP-ribosylation	GO:0005515,protein binding|GO:0016798,hydrolase activity, acting on glycosyl bonds|GO:0019213,deacetylase activity	GO:0005634,nucleus|GO:0005654,nucleoplasm|GO:0005739,mitochondrion		0.0480152	0.0441755	0.0794764	0.0439659	0.119232	0.253026	0.0917927	0.15054	0.158141	0.157037	0.350539	0.545094	0.441609	0.000559385	0.00677728	0.0609326
DMR_353	3	114103067	114103345	278	3	cg05678155,cg25906096,cg13792714	ZBTB20	TSS1500	opensea=3	GO:0000122,negative regulation of transcription from RNA polymerase II promoter|GO:0006351,transcription, DNA-templated|GO:0032728,positive regulation of interferon-beta production|GO:0032755,positive regulation of interleukin-6 production|GO:0032760,positive regulation of tumor necrosis factor production	GO:0001078,transcriptional repressor activity, RNA polymerase II proximal promoter sequence-specific DNA binding|GO:0003677,DNA binding|GO:0046872,metal ion binding	GO:0005634,nucleus		0.0404193	0.0220623	0.0477522	0.0354896	0.0552613	0.0817964	0.0789411	0.051172	0.144006	0.190268	0.291296	0.451032	0.359838	0.000628233	0.00718641	0.0646109
DMR_354	3	128712555	128712882	327	3	cg24301690,cg13740709,cg04740599	KIAA1257	5'UTR	Island=3					0.0358499	0.0278494	0.0377112	0.0306235	0.0386482	0.0746126	0.0674989	0.051193	0.10682	0.115149	0.273335	0.87092	0.483631	0.000628233	0.00718641	0.0646109
DMR_355	6	33161107	33161849	742	11	cg22320183,cg17560929,cg02266086,cg16634404,cg26357820,cg10143146,cg22190028,cg21232625,cg08481075,cg03949284,cg09708959	COL11A2,RXRB	TSS1500	Island=5,S_Shore=6	GO:0001501,skeletal system development|GO:0001501,skeletal system development|GO:0007605,sensory perception of sound|GO:0030199,collagen fibril organization|GO:0030574,collagen catabolic process|GO:0051216,cartilage development|GO:0060021,palate development|GO:0060023,soft palate development,GO:0006367,transcription initiation from RNA polymerase II promoter|GO:0043401,steroid hormone mediated si…	GO:0005515,protein binding|GO:0030020,extracellular matrix structural constituent conferring tensile strength|GO:0030674,protein binding, bridging|GO:0046872,metal ion binding,GO:0000977,RNA polymerase II regulatory region sequence-specific DNA binding|GO:0001228,transcriptional activator activity, RNA polymerase II transcription regulatory region sequence-specific DNA binding|GO:0003700,DNA bind…	GO:0005576,extracellular region|GO:0005592,collagen type XI trimer|GO:0005788,endoplasmic reticulum lumen,GO:0005634,nucleus|GO:0005654,nucleoplasm	hsa04974 Protein digestion and absorption - Homo sapiens (human),hsa03320 PPAR signaling pathway - Homo sapiens (human)|hsa04659 Th17 cell differentiation - Homo sapiens (human)|hsa04919 Thyroid hormone signaling pathway - Homo sapiens (human)|hsa04920 Adipocytokine signaling pathway - Homo sapiens (human)|hsa05200 Pathways in cancer - Homo sapiens (human)|hsa05202 Transcriptional misregulation i…	0.0483788	0.0384464	0.0571169	0.05152	0.055262	0.128613	0.110917	0.0905495	0.149455	0.152122	0.289966	1.02572	0.500314	0.000404479	0.00554099	0.0498174
DMR_356	5	102201102	102201890	788	11	cg15999165,cg20131596,cg07380906,cg23021168,cg11636629,cg10640944,cg05587118,cg24531022,cg03939618,cg21596317,cg04227789	PAM	TSS1500	Island=4,N_Shore=7	GO:0001519,peptide amidation|GO:0001666,response to hypoxia|GO:0001676,long-chain fatty acid metabolic process|GO:0006357,regulation of transcription from RNA polymerase II promoter|GO:0007417,central nervous system development|GO:0007507,heart development|GO:0007595,lactation|GO:0009268,response to pH|GO:0009404,toxin metabolic process|GO:0018032,protein amidation|GO:0022602,ovulation cycle proc…	GO:0004504,peptidylglycine monooxygenase activity|GO:0004598,peptidylamidoglycolate lyase activity|GO:0005507,copper ion binding|GO:0005509,calcium ion binding|GO:0005515,protein binding|GO:0008270,zinc ion binding|GO:0019901,protein kinase binding|GO:0031418,L-ascorbic acid binding	GO:0005802,trans-Golgi network|GO:0005886,plasma membrane|GO:0009986,cell surface|GO:0016020,membrane|GO:0016021,integral component of membrane|GO:0030667,secretory granule membrane|GO:0043005,neuron projection|GO:0043204,perikaryon|GO:0048471,perinuclear region of cytoplasm|GO:0070062,extracellular exosome		0.140612	0.136011	0.143979	0.147362	0.164882	0.0619798	0.0567115	0.0452262	0.0862081	0.0889022	0.991901	4.17522	2.30696	0.000404479	0.00554099	0.0498174
DMR_357	7	12610689	12611236	547	7	cg11040906,cg24785074,cg20580524,cg04948346,cg20728105,cg03604367,cg26566660	SCIN	Body	Island=3,S_Shore=4	GO:0008285,negative regulation of cell proliferation|GO:0017156,calcium ion regulated exocytosis|GO:0032330,regulation of chondrocyte differentiation|GO:0042989,sequestering of actin monomers|GO:0043065,positive regulation of apoptotic process|GO:0045010,actin nucleation|GO:0045654,positive regulation of megakaryocyte differentiation|GO:0051014,actin filament severing|GO:0051047,positive regulati…	GO:0001786,phosphatidylserine binding|GO:0003779,actin binding|GO:0003779,actin binding|GO:0005509,calcium ion binding|GO:0005509,calcium ion binding|GO:0005545,1-phosphatidylinositol binding|GO:0005546,phosphatidylinositol-4,5-bisphosphate binding|GO:0051015,actin filament binding	GO:0002102,podosome|GO:0005737,cytoplasm|GO:0005903,brush border|GO:0005938,cell cortex|GO:0030054,cell junction|GO:0042995,cell projection|GO:0070062,extracellular exosome	hsa04666 Fc gamma R-mediated phagocytosis - Homo sapiens (human)|hsa04810 Regulation of actin cytoskeleton - Homo sapiens (human)|hsa05203 Viral carcinogenesis - Homo sapiens (human)	0.0689319	0.062356	0.169423	0.0974656	0.176078	0.308825	0.191337	0.104062	0.351368	0.346576	0.368953	0.724352	0.530583	0.000550779	0.00674555	0.0606473
DMR_358	1	1182226	1182228	2	2	cg06136878,cg25594899	FAM132A	TSS200	Island=2					0.0204632	0.0188518	0.0225889	0.0171886	0.0220341	0.0265911	0.0199013	0.0257503	0.0150936	0.0210518	0.749594	1.32482	1.03721	0.000249572	0.00398872	0.0358615
DMR_359	12	7023195	7023352	157	5	cg09692396,cg04604946,cg19056004,cg14834260,cg12119858	LRRC23,ENO2	TSS1500	Island=4,N_Shore=1	GO:0008150,biological_process,GO:0006094,gluconeogenesis|GO:0006096,glycolytic process|GO:0061621,canonical glycolysis	GO:0003674,molecular_function,GO:0000287,magnesium ion binding|GO:0004634,phosphopyruvate hydratase activity|GO:0004634,phosphopyruvate hydratase activity|GO:0005515,protein binding	GO:0005575,cellular_component,GO:0000015,phosphopyruvate hydratase complex|GO:0005615,extracellular space|GO:0005829,cytosol|GO:0005886,plasma membrane|GO:0016020,membrane|GO:0070062,extracellular exosome	,hsa00010 Glycolysis / Gluconeogenesis - Homo sapiens (human)|hsa01100 Metabolic pathways - Homo sapiens (human)|hsa01200 Carbon metabolism - Homo sapiens (human)|hsa01230 Biosynthesis of amino acids - Homo sapiens (human)|hsa03018 RNA degradation - Homo sapiens (human)|hsa04066 HIF-1 signaling pathway - Homo sapiens (human)	0.0447139	0.0430755	0.0619072	0.0501987	0.0617294	0.130362	0.0970309	0.0761463	0.19722	0.171026	0.291803	0.562148	0.377071	0.000567991	0.00684475	0.0615392
DMR_360	4	154125535	154125720	185	5	cg17852507,cg02616418,cg12793610,cg17371020,cg23820816	TRIM2	TSS200	opensea=5	GO:0016567,protein ubiquitination|GO:0043523,regulation of neuron apoptotic process	GO:0004842,ubiquitin-protein transferase activity|GO:0005515,protein binding|GO:0008270,zinc ion binding	GO:0005737,cytoplasm		0.185194	0.181567	0.249479	0.223583	0.287075	0.449637	0.385085	0.3631	0.429504	0.501808	0.452023	0.614082	0.538921	0.000567991	0.00684475	0.0615392
DMR_361	5	115152712	115152938	226	4	cg04676799,cg16198692,cg07644368,cg21377673	CDO1	TSS1500	Island=1,S_Shore=3	GO:0000097,sulfur amino acid biosynthetic process|GO:0006534,cysteine metabolic process|GO:0006954,inflammatory response|GO:0007595,lactation|GO:0019448,L-cysteine catabolic process|GO:0033762,response to glucagon|GO:0042412,taurine biosynthetic process|GO:0042412,taurine biosynthetic process|GO:0043200,response to amino acid|GO:0045471,response to ethanol|GO:0051384,response to glucocorticoid|GO…	GO:0008198,ferrous iron binding|GO:0017172,cysteine dioxygenase activity|GO:0017172,cysteine dioxygenase activity	GO:0005829,cytosol	hsa00270 Cysteine and methionine metabolism - Homo sapiens (human)|hsa00430 Taurine and hypotaurine metabolism - Homo sapiens (human)|hsa01100 Metabolic pathways - Homo sapiens (human)	0.066177	0.0447416	0.0703057	0.0611376	0.0729615	0.141342	0.147133	0.093411	0.190087	0.18811	0.269135	0.990267	0.539672	0.000602415	0.00701572	0.0630763
DMR_362	10	46090686	46090807	121	4	cg20326425,cg26476156,cg03467088,cg18980469	MARCH8	TSS1500	S_Shore=4	GO:0000209,protein polyubiquitination|GO:0002250,adaptive immune response	GO:0004842,ubiquitin-protein transferase activity|GO:0008270,zinc ion binding	GO:0005764,lysosome|GO:0005765,lysosomal membrane|GO:0005768,endosome|GO:0016021,integral component of membrane|GO:0030659,cytoplasmic vesicle membrane|GO:0031901,early endosome membrane		0.0291525	0.0174489	0.0352451	0.0268539	0.0351594	0.0712279	0.0743961	0.0404114	0.122602	0.147051	0.201886	0.688496	0.396142	0.000611021	0.00707936	0.0636485
DMR_363	6	32134854	32135396	542	20	cg26687830,cg10262770,cg08472222,cg16468631,cg17208278,cg12508392,cg16681436,cg12619728,cg02769614,cg00359087,cg11108115,cg07608094,cg16006963,cg07754347,cg03488588,cg06024540,cg05850971,cg16793249,cg17527814,cg24328676	EGFL8	Body	Island=11,S_Shore=9	GO:0001701,in utero embryonic development	GO:0005509,calcium ion binding	GO:0005576,extracellular region		0.660674	0.677971	0.685716	0.679693	0.695381	0.764812	0.751926	0.752867	0.768547	0.777399	0.625306	1.06393	0.888132	0.000327025	0.00476991	0.0428849
DMR_364	16	75150456	75150880	424	8	cg04906242,cg16540789,cg03991512,cg09899215,cg24429836,cg03085549,cg03743982,cg07320140	LDHD	TSS1500	S_Shelf=1,S_Shore=7	GO:0055114,oxidation-reduction process	GO:0004458,D-lactate dehydrogenase (cytochrome) activity|GO:0005515,protein binding|GO:0050660,flavin adenine dinucleotide binding	GO:0005739,mitochondrion|GO:0005743,mitochondrial inner membrane	hsa00620 Pyruvate metabolism - Homo sapiens (human)	0.0397081	0.0267191	0.0434906	0.0378193	0.051626	0.0651697	0.0791557	0.0474812	0.111486	0.171219	0.204359	0.617886	0.396385	0.000550779	0.00674555	0.0606473
DMR_365	10	729204	729956	752	7	cg05450336,cg16936421,cg12014181,cg18503829,cg01022670,cg26873457,cg10064922	DIP2C	Body	opensea=7	GO:0008150,biological_process|GO:0008152,metabolic process	GO:0003674,molecular_function|GO:0003824,catalytic activity	GO:0005575,cellular_component		0.07508	0.0471484	0.0943664	0.0658515	0.100615	0.15792	0.157415	0.0887214	0.242759	0.274095	0.231528	0.558856	0.386373	0.000593809	0.00700601	0.0629891
DMR_366	8	27347861	27348347	486	6	cg07331053,cg07766743,cg14010279,cg15420071,cg25399743,cg21608792	EPHX2	TSS1500	N_Shore=6	GO:0006805,xenobiotic metabolic process|GO:0006874,cellular calcium ion homeostasis|GO:0006954,inflammatory response|GO:0008217,regulation of blood pressure|GO:0009636,response to toxic substance|GO:0010628,positive regulation of gene expression|GO:0016311,dephosphorylation|GO:0017144,drug metabolic process|GO:0019373,epoxygenase P450 pathway|GO:0042632,cholesterol homeostasis|GO:0046272,stilbene…	GO:0000287,magnesium ion binding|GO:0004301,epoxide hydrolase activity|GO:0004301,epoxide hydrolase activity|GO:0005102,receptor binding|GO:0015643,toxic substance binding|GO:0016791,phosphatase activity|GO:0033885,10-hydroxy-9-(phosphonooxy)octadecanoate phosphatase activity|GO:0042577,lipid phosphatase activity|GO:0042803,protein homodimerization activity|GO:0042803,protein homodimerization act…	GO:0005777,peroxisome|GO:0005829,cytosol|GO:0005829,cytosol|GO:0005829,cytosol|GO:0070062,extracellular exosome	hsa00590 Arachidonic acid metabolism - Homo sapiens (human)|hsa01100 Metabolic pathways - Homo sapiens (human)|hsa04146 Peroxisome - Homo sapiens (human)	0.0938401	0.0910988	0.109725	0.0964121	0.122249	0.108639	0.104472	0.0867447	0.179293	0.199658	0.215954	1.62898	0.660996	0.000585203	0.00695913	0.0625675
DMR_367	8	27850423	27850772	349	5	cg22272888,cg01180684,cg03871354,cg23597425,cg24861124	SCARA5	TSS1500	opensea=5	GO:0006879,cellular iron ion homeostasis|GO:0006897,endocytosis|GO:0006898,receptor-mediated endocytosis|GO:0010468,regulation of gene expression|GO:0030193,regulation of blood coagulation|GO:0034605,cellular response to heat|GO:0034755,iron ion transmembrane transport|GO:0070207,protein homotrimerization	GO:0005044,scavenger receptor activity|GO:0070287,ferritin receptor activity	GO:0005887,integral component of plasma membrane|GO:0009986,cell surface		0.0468264	0.0361543	0.051942	0.045347	0.0558604	0.103327	0.0872028	0.0762568	0.131441	0.154274	0.238641	0.666396	0.456045	0.000602415	0.00701572	0.0630763
DMR_368	8	143859399	143860090	691	11	cg22861548,cg23180489,cg08090164,cg19021188,cg00399059,cg23894907,cg03735656,cg25483741,cg15511327,cg10555383,cg05569086	LYNX1	TSS1500	Island=2,S_Shore=9	GO:0099601,regulation of neurotransmitter receptor activity	GO:0030548,acetylcholine receptor regulator activity|GO:0033130,acetylcholine receptor binding	GO:0005783,endoplasmic reticulum|GO:0005886,plasma membrane|GO:0030425,dendrite|GO:0031225,anchored component of membrane		0.221789	0.223011	0.257476	0.292131	0.335897	0.496357	0.357078	0.354987	0.498662	0.470664	0.262215	0.861977	0.589802	0.000438902	0.0058873	0.052931
DMR_369	16	2260770	2261069	299	5	cg26873644,cg25665528,cg16892623,cg07032866,cg11648456	C16orf79,BRICD5	TSS200	N_Shelf=5	,GO:0042127,regulation of cell proliferation	,GO:0005515,protein binding	,GO:0005615,extracellular space|GO:0016021,integral component of membrane		0.483182	0.463484	0.481438	0.452007	0.531667	0.636748	0.638306	0.604909	0.664344	0.702294	0.596455	0.942579	0.737411	0.000628233	0.00718641	0.0646109
DMR_370	7	87936598	87936923	325	4	cg26619035,cg25143609,cg08268559,cg05340059	STEAP4	TSS1500	opensea=4	GO:0015677,copper ion import|GO:0045444,fat cell differentiation|GO:0055072,iron ion homeostasis|GO:0055114,oxidation-reduction process|GO:0098706,ferric iron import across plasma membrane	GO:0008823,cupric reductase activity|GO:0046872,metal ion binding|GO:0052851,ferric-chelate reductase (NADPH) activity	GO:0000139,Golgi membrane|GO:0005768,endosome|GO:0005794,Golgi apparatus|GO:0005886,plasma membrane|GO:0005887,integral component of plasma membrane|GO:0031901,early endosome membrane|GO:0070062,extracellular exosome		0.878847	0.913879	0.906496	0.870655	0.916145	0.712489	0.768486	0.73493	0.735714	0.827676	1.00951	1.66973	1.257	0.000662656	0.00732008	0.0658127
DMR_371	22	24128528	24128854	326	4	cg07897734,cg01912455,cg05107507,cg21738476	SMARCB1	TSS1500	N_Shore=4	GO:0006281,DNA repair|GO:0006337,nucleosome disassembly|GO:0006338,chromatin remodeling|GO:0006338,chromatin remodeling|GO:0006351,transcription, DNA-templated|GO:0006357,regulation of transcription from RNA polymerase II promoter|GO:0007049,cell cycle|GO:0007399,nervous system development|GO:0008285,negative regulation of cell proliferation|GO:0015074,DNA integration|GO:0016569,covalent chromati…	GO:0000978,RNA polymerase II proximal promoter sequence-specific DNA binding|GO:0000980,RNA polymerase II distal enhancer sequence-specific DNA binding|GO:0001164,RNA polymerase I CORE element sequence-specific DNA binding|GO:0002039,p53 binding|GO:0003677,DNA binding|GO:0003713,transcription coactivator activity|GO:0003713,transcription coactivator activity|GO:0005515,protein binding|GO:0030957,…	GO:0000790,nuclear chromatin|GO:0001650,fibrillar center|GO:0005634,nucleus|GO:0005654,nucleoplasm|GO:0005654,nucleoplasm|GO:0005730,nucleolus|GO:0016514,SWI/SNF complex|GO:0043231,intracellular membrane-bounded organelle|GO:0043234,protein complex|GO:0071564,npBAF complex|GO:0071565,nBAF complex		0.0627364	0.0359029	0.0762117	0.0515815	0.076056	0.179847	0.144889	0.120198	0.220549	0.257475	0.221965	0.467216	0.335921	0.000688474	0.00749505	0.0673859
DMR_372	12	123752628	123753272	644	9	cg20181887,cg10289269,cg05760918,cg24203169,cg25326086,cg17158827,cg01247747,cg01660796,cg25630910	CDK2AP1	5'UTR	N_Shore=9	GO:0001934,positive regulation of protein phosphorylation|GO:0006261,DNA-dependent DNA replication|GO:0007049,cell cycle	GO:0005515,protein binding|GO:0070182,DNA polymerase binding	GO:0005634,nucleus|GO:0005654,nucleoplasm|GO:0005829,cytosol|GO:0048471,perinuclear region of cytoplasm		0.0518597	0.0475843	0.0576018	0.0529682	0.0727406	0.150396	0.102489	0.0902553	0.145344	0.130913	0.321058	0.647847	0.480127	0.000533567	0.00660656	0.0593977
DMR_373	3	52868982	52869808	826	9	cg21547371,cg25584187,cg12426525,cg24205871,cg18741586,cg09354317,cg23815702,cg12941836,cg25775751	MUSTN1	TSS1500	opensea=9	GO:0002062,chondrocyte differentiation|GO:0035988,chondrocyte proliferation|GO:0042246,tissue regeneration		GO:0005634,nucleus		0.388728	0.398469	0.416398	0.394862	0.393027	0.643074	0.586946	0.632334	0.587073	0.585335	0.413948	0.742417	0.646448	0.000533567	0.00660656	0.0593977
DMR_374	3	122640625	122641316	691	8	cg24925929,cg25439655,cg19389001,cg00729894,cg19141448,cg18073906,cg07297832,cg10783060	SEMA5B	Body	Island=7,N_Shore=1	GO:0048675,axon extension|GO:0050908,detection of light stimulus involved in visual perception|GO:0050919,negative chemotaxis|GO:0097485,neuron projection guidance	GO:0038191,neuropilin binding	GO:0005615,extracellular space|GO:0016021,integral component of membrane	hsa04360 Axon guidance - Homo sapiens (human)	0.07774	0.0809037	0.0734061	0.100444	0.0932182	0.197432	0.126891	0.176786	0.222983	0.184896	0.19351	0.685063	0.469061	0.00065405	0.00729655	0.0656012
DMR_375	12	130502003	130502586	583	8	cg22912997,cg13654797,cg02506248,cg12417603,cg23858650,cg09003509,cg06214997,cg20901959		IGR	opensea=8					0.476772	0.516233	0.517047	0.510387	0.536997	0.302014	0.274334	0.263248	0.383049	0.377168	1.3509	2.27272	1.61741	0.00065405	0.00729655	0.0656012
DMR_376	8	52721802	52722539	737	8	cg20480642,cg24946253,cg22653915,cg13492337,cg25164777,cg21514857,cg22859585,cg10126372	PXDNL	TSS1500	opensea=8	GO:0006979,response to oxidative stress|GO:0042744,hydrogen peroxide catabolic process|GO:0055114,oxidation-reduction process|GO:0090305,nucleic acid phosphodiester bond hydrolysis|GO:0098869,cellular oxidant detoxification	GO:0004519,endonuclease activity|GO:0004601,peroxidase activity|GO:0004601,peroxidase activity|GO:0020037,heme binding|GO:0046872,metal ion binding	GO:0005615,extracellular space|GO:0005615,extracellular space|GO:0005737,cytoplasm		0.159109	0.145062	0.178732	0.163843	0.196496	0.249154	0.233984	0.173634	0.337366	0.360863	0.306847	0.84849	0.540833	0.00065405	0.00729655	0.0656012
DMR_377	19	46282571	46283080	509	8	cg08332594,cg18449189,cg06710981,cg02205611,cg26298722,cg18511790,cg18213911,cg05160664	DMPK	TSS200	Island=8	GO:0002028,regulation of sodium ion transport|GO:0006468,protein phosphorylation|GO:0006874,cellular calcium ion homeostasis|GO:0006874,cellular calcium ion homeostasis|GO:0006998,nuclear envelope organization|GO:0008016,regulation of heart contraction|GO:0010657,muscle cell apoptotic process|GO:0010830,regulation of myotube differentiation|GO:0014722,regulation of skeletal muscle contraction by …	GO:0004674,protein serine/threonine kinase activity|GO:0004674,protein serine/threonine kinase activity|GO:0005515,protein binding|GO:0005524,ATP binding|GO:0017020,myosin phosphatase regulator activity|GO:0031072,heat shock protein binding|GO:0046872,metal ion binding	GO:0005640,nuclear outer membrane|GO:0005789,endoplasmic reticulum membrane|GO:0005829,cytosol|GO:0005886,plasma membrane|GO:0005886,plasma membrane|GO:0031307,integral component of mitochondrial outer membrane|GO:0031965,nuclear membrane|GO:0031965,nuclear membrane|GO:0033017,sarcoplasmic reticulum membrane|GO:0033017,sarcoplasmic reticulum membrane|GO:0033017,sarcoplasmic reticulum membrane		0.127316	0.10696	0.120553	0.107945	0.11368	0.214579	0.194475	0.230368	0.177162	0.173008	0.351626	1.02439	0.579523	0.00065405	0.00729655	0.0656012
DMR_378	17	7253189	7253720	531	8	cg06721232,cg25900902,cg20217592,cg02448825,cg15713546,cg07925670,cg02676175,cg08324090	ACAP1,KCTD11	TSS1500	Island=7,N_Shore=1	GO:0015031,protein transport|GO:0043547,positive regulation of GTPase activity,GO:0007049,cell cycle|GO:0007406,negative regulation of neuroblast proliferation|GO:0016567,protein ubiquitination|GO:0040008,regulation of growth|GO:0045666,positive regulation of neuron differentiation|GO:0045879,negative regulation of smoothened signaling pathway|GO:0051260,protein homooligomerization	GO:0005096,GTPase activator activity|GO:0005515,protein binding|GO:0046872,metal ion binding,GO:0016740,transferase activity|GO:0042802,identical protein binding	GO:0016020,membrane|GO:0043231,intracellular membrane-bounded organelle|GO:0055038,recycling endosome membrane,GO:0005737,cytoplasm	hsa04144 Endocytosis - Homo sapiens (human),	0.064624	0.044111	0.0886996	0.0456211	0.0759138	0.11994	0.145951	0.072859	0.196823	0.221654	0.306352	0.779573	0.432621	0.00065405	0.00729655	0.0656012
DMR_379	7	157808983	157809596	613	7	cg22676516,cg17714807,cg23455837,cg26320504,cg00280858,cg00239915,cg15948324	PTPRN2	Body	opensea=7	GO:0006470,protein dephosphorylation|GO:0006629,lipid metabolic process|GO:0007269,neurotransmitter secretion|GO:0034260,negative regulation of GTPase activity|GO:0035335,peptidyl-tyrosine dephosphorylation|GO:0035773,insulin secretion involved in cellular response to glucose stimulus|GO:0043312,neutrophil degranulation	GO:0005001,transmembrane receptor protein tyrosine phosphatase activity	GO:0005788,endoplasmic reticulum lumen|GO:0005886,plasma membrane|GO:0005887,integral component of plasma membrane|GO:0030054,cell junction|GO:0030667,secretory granule membrane|GO:0030672,synaptic vesicle membrane|GO:0043195,terminal bouton|GO:0043235,receptor complex|GO:0101003,ficolin-1-rich granule membrane	hsa04940 Type I diabetes mellitus - Homo sapiens (human)	0.089634	0.0735497	0.0985961	0.0832386	0.0991064	0.147089	0.135778	0.113612	0.220198	0.231813	0.256707	0.841187	0.405745	0.000645444	0.00729077	0.0655492
DMR_380	12	106978920	106979482	562	7	cg14415816,cg17851046,cg00450784,cg00379648,cg09774007,cg21961487,cg10040329	RFX4	Body	Island=3,N_Shore=4	GO:0006366,transcription from RNA polymerase II promoter|GO:0021516,dorsal spinal cord development|GO:0021537,telencephalon development|GO:0021696,cerebellar cortex morphogenesis|GO:0021914,negative regulation of smoothened signaling pathway involved in ventral spinal cord patterning|GO:0030901,midbrain development|GO:0045944,positive regulation of transcription from RNA polymerase II promoter|GO…	GO:0000978,RNA polymerase II proximal promoter sequence-specific DNA binding|GO:0001077,transcriptional activator activity, RNA polymerase II proximal promoter sequence-specific DNA binding|GO:0003682,chromatin binding|GO:0005515,protein binding	GO:0005634,nucleus		0.326993	0.601715	0.436519	0.388817	0.449208	0.255997	0.370087	0.188299	0.18453	0.216924	1.43627	2.12651	1.79495	0.000645444	0.00729077	0.0655492
DMR_381	21	42733729	42733894	165	6	cg06752054,cg05656374,cg02949186,cg26596712,cg15281283,cg21390801	MX2	TSS1500	opensea=6	GO:0000266,mitochondrial fission|GO:0003374,dynamin family protein polymerization involved in mitochondrial fission|GO:0006952,defense response|GO:0009615,response to virus|GO:0015031,protein transport|GO:0035455,response to interferon-alpha|GO:0045087,innate immune response|GO:0046822,regulation of nucleocytoplasmic transport|GO:0051028,mRNA transport|GO:0051607,defense response to virus|GO:0051…	GO:0003924,GTPase activity|GO:0005515,protein binding|GO:0005525,GTP binding|GO:0008017,microtubule binding	GO:0005634,nucleus|GO:0005643,nuclear pore|GO:0005737,cytoplasm|GO:0005829,cytosol|GO:0031966,mitochondrial membrane		0.624658	0.670585	0.619829	0.665209	0.673613	0.457012	0.454139	0.398946	0.418575	0.426536	1.28787	2.00532	1.55786	0.000645444	0.00729077	0.0655492
DMR_382	3	42694783	42695307	524	6	cg06399164,cg02316506,cg22027689,cg22304662,cg08743580,cg01802713	ZBTB47	TSS1500	N_Shore=6	GO:0006351,transcription, DNA-templated|GO:0006355,regulation of transcription, DNA-templated	GO:0003677,DNA binding|GO:0046872,metal ion binding	GO:0005634,nucleus		0.112541	0.11	0.116796	0.113567	0.127827	0.136207	0.130867	0.108013	0.194424	0.207298	0.327788	1.22864	0.532282	0.000679868	0.00745539	0.0670293
DMR_383	6	43027930	43028296	366	3	cg17347628,cg16297435,cg07099407	KLC4	TSS1500	S_Shore=3		GO:0003777,microtubule motor activity|GO:0005515,protein binding	GO:0005737,cytoplasm|GO:0005871,kinesin complex|GO:0005874,microtubule	hsa05132 Salmonella infection - Homo sapiens (human)	0.0400914	0.025024	0.0537286	0.0355849	0.0478548	0.115658	0.119098	0.0594703	0.137936	0.15454	0.296298	0.534774	0.414368	0.00069708	0.00753415	0.0677374
DMR_384	4	114900050	114900431	381	3	cg18378811,cg12214451,cg05601456	ARSJ	1stExon	Island=1,N_Shore=2	GO:0006687,glycosphingolipid metabolic process|GO:0043687,post-translational protein modification	GO:0004065,arylsulfatase activity|GO:0046872,metal ion binding	GO:0005576,extracellular region|GO:0005788,endoplasmic reticulum lumen		0.0345066	0.0216271	0.0478708	0.0270376	0.0400599	0.0931694	0.0739055	0.0530316	0.141131	0.13882	0.271115	0.53961	0.415959	0.00069708	0.00753415	0.0677374
DMR_385	6	152128328	152129036	708	15	cg21950534,cg00655307,cg19411146,cg27316393,cg21614759,cg23009221,cg24900983,cg21969073,cg05171584,cg15980539,cg11251858,cg01777019,cg11813455,cg20627916,cg23467008	ESR1	TSS1500	Island=3,N_Shore=12	GO:0000122,negative regulation of transcription from RNA polymerase II promoter|GO:0001547,antral ovarian follicle growth|GO:0002064,epithelial cell development|GO:0006338,chromatin remodeling|GO:0006351,transcription, DNA-templated|GO:0006355,regulation of transcription, DNA-templated|GO:0006357,regulation of transcription from RNA polymerase II promoter|GO:0006366,transcription from RNA polymer…	GO:0000978,RNA polymerase II proximal promoter sequence-specific DNA binding|GO:0001046,core promoter sequence-specific DNA binding|GO:0001077,transcriptional activator activity, RNA polymerase II proximal promoter sequence-specific DNA binding|GO:0001093,TFIIB-class transcription factor binding|GO:0001223,transcription coactivator binding|GO:0003682,chromatin binding|GO:0003700,DNA binding trans…	GO:0000790,nuclear chromatin|GO:0005634,nucleus|GO:0005654,nucleoplasm|GO:0005737,cytoplasm|GO:0005794,Golgi apparatus|GO:0005886,plasma membrane|GO:0016020,membrane|GO:0016021,integral component of membrane|GO:0035327,transcriptionally active chromatin|GO:0043234,protein complex|GO:0097550,transcriptional preinitiation complex	hsa01522 Endocrine resistance - Homo sapiens (human)|hsa04915 Estrogen signaling pathway - Homo sapiens (human)|hsa04917 Prolactin signaling pathway - Homo sapiens (human)|hsa04919 Thyroid hormone signaling pathway - Homo sapiens (human)|hsa04961 Endocrine and other factor-regulated calcium reabsorption - Homo sapiens (human)|hsa05205 Proteoglycans in cancer - Homo sapiens (human)|hsa05224 Breast…	0.103294	0.124796	0.107963	0.0916797	0.141633	0.0639957	0.0548132	0.0576853	0.0595927	0.0632399	1.47162	3.45024	1.95308	0.000361449	0.00513896	0.0462029
DMR_386	19	1355910	1356444	534	10	cg23674169,cg26282762,cg02413187,cg13646005,cg07737135,cg08149682,cg08643131,cg04604656,cg23057220,cg10716163	MUM1	TSS200	S_Shore=10	GO:0006281,DNA repair|GO:0006325,chromatin organization	GO:0005515,protein binding|GO:0031491,nucleosome binding	GO:0005634,nucleus|GO:0005829,cytosol		0.0608108	0.0608855	0.0779469	0.0625944	0.0810183	0.144398	0.135249	0.0999023	0.177614	0.201059	0.236412	0.756164	0.468072	0.000524961	0.00653592	0.0587625
DMR_387	16	89006020	89006455	435	9	cg24732734,cg12168623,cg16686594,cg04468133,cg27543201,cg05702747,cg12829360,cg11004836,cg24341579	LOC100129697,CBFA2T3	TSS1500	Island=4,N_Shore=5	,GO:0001666,response to hypoxia|GO:0006351,transcription, DNA-templated|GO:0008283,cell proliferation|GO:0008285,negative regulation of cell proliferation|GO:0030851,granulocyte differentiation|GO:0032436,positive regulation of proteasomal ubiquitin-dependent protein catabolic process|GO:0045820,negative regulation of glycolytic process|GO:0045892,negative regulation of transcription, DNA-templat…	,GO:0003700,DNA binding transcription factor activity|GO:0003714,transcription corepressor activity|GO:0005515,protein binding|GO:0046872,metal ion binding	,GO:0000139,Golgi membrane|GO:0005634,nucleus|GO:0005654,nucleoplasm|GO:0005730,nucleolus		0.275728	0.283821	0.24582	0.289051	0.307402	0.092546	0.150472	0.0743412	0.145403	0.184426	1.35492	3.99092	2.21424	0.000576597	0.00689316	0.0619745
DMR_388	16	967680	968265	585	8	cg09664373,cg02200944,cg00849267,cg00263700,cg09379737,cg00931124,cg01778190,cg07702526	LMF1	Body	S_Shore=8	GO:0006641,triglyceride metabolic process|GO:0006888,ER to Golgi vesicle-mediated transport|GO:0009306,protein secretion|GO:0033578,protein glycosylation in Golgi|GO:0034382,chylomicron remnant clearance|GO:0051004,regulation of lipoprotein lipase activity|GO:0051006,positive regulation of lipoprotein lipase activity|GO:0051604,protein maturation|GO:0090181,regulation of cholesterol metabolic pro…		GO:0005789,endoplasmic reticulum membrane|GO:0005789,endoplasmic reticulum membrane|GO:0005794,Golgi apparatus|GO:0016021,integral component of membrane		0.479685	0.456627	0.504753	0.432028	0.548588	0.71964	0.66828	0.666593	0.659279	0.683864	0.421396	0.919134	0.672563	0.000662656	0.00732008	0.0658127
DMR_389	12	3309264	3310269	1005	8	cg26107333,cg02815776,cg00591932,cg16924822,cg23065927,cg20162381,cg21303763,cg07987843	TSPAN9	5'UTR	Island=8	GO:0007166,cell surface receptor signaling pathway|GO:0008150,biological_process	GO:0003674,molecular_function	GO:0005886,plasma membrane|GO:0005887,integral component of plasma membrane|GO:0005925,focal adhesion|GO:0097197,tetraspanin-enriched microdomain		0.0440014	0.0352781	0.0493537	0.03748	0.0465105	0.145233	0.105364	0.077496	0.128041	0.0926435	0.254865	0.708359	0.435869	0.000662656	0.00732008	0.0658127
DMR_390	17	46679135	46679813	678	5	cg14509967,cg02566861,cg11207533,cg09983216,cg07796575	LOC404266,HOXB-AS3	Body	opensea=2,S_Shelf=3					0.0343784	0.0329515	0.0469186	0.0341812	0.0483326	0.0887608	0.0944646	0.0521376	0.138581	0.154804	0.241795	0.779494	0.425989	0.000748716	0.00792127	0.0712179
DMR_391	3	21792195	21792543	348	4	cg17024919,cg02920129,cg18267381,cg18503679	ZNF385D	Body	opensea=4	GO:0072332,intrinsic apoptotic signaling pathway by p53 class mediator	GO:0002039,p53 binding|GO:0003723,RNA binding|GO:0008270,zinc ion binding	GO:0005634,nucleus		0.0161529	0.01736	0.019213	0.0196109	0.0216301	0.0332655	0.0389951	0.0201006	0.0830624	0.0818936	0.20208	0.747626	0.412466	0.000774533	0.00798815	0.0718192
DMR_392	2	214149425	214149735	310	3	cg07965640,cg03691573,cg01372071	SPAG16,LOC100130451	TSS1500	Island=1,S_Shore=2	GO:0007288,sperm axoneme assembly|GO:0035082,axoneme assembly|GO:0051012,microtubule sliding|GO:0060271,cilium assembly|GO:0060294,cilium movement involved in cell motility|GO:0097231,cell motility in response to calcium ion,		GO:0005634,nucleus|GO:0005737,cytoplasm|GO:0005930,axoneme|GO:0031514,motile cilium|GO:1990716,axonemal central apparatus,		0.0224176	0.0200766	0.0338559	0.0226936	0.0346956	0.0702778	0.0646428	0.044654	0.0993257	0.125797	0.270552	0.633795	0.415142	0.000705686	0.00759076	0.0682463
DMR_393	8	19539991	19540809	818	12	cg14854503,cg18325192,cg02694058,cg05026214,cg24423468,cg11505841,cg14818701,cg15379858,cg11095122,cg20450123,cg11155735,cg23328404	CSGALNACT1	TSS1500	opensea=12	GO:0001958,endochondral ossification|GO:0007399,nervous system development|GO:0008037,cell recognition|GO:0008283,cell proliferation|GO:0009653,anatomical structure morphogenesis|GO:0015014,heparan sulfate proteoglycan biosynthetic process, polysaccharide chain biosynthetic process|GO:0019276,UDP-N-acetylgalactosamine metabolic process|GO:0030166,proteoglycan biosynthetic process|GO:0030198,extra…	GO:0008376,acetylgalactosaminyltransferase activity|GO:0008376,acetylgalactosaminyltransferase activity|GO:0008955,peptidoglycan glycosyltransferase activity|GO:0015020,glucuronosyltransferase activity|GO:0046872,metal ion binding|GO:0047237,glucuronylgalactosylproteoglycan 4-beta-N-acetylgalactosaminyltransferase activity|GO:0047238,glucuronosyl-N-acetylgalactosaminyl-proteoglycan 4-beta-N-acety…	GO:0000139,Golgi membrane|GO:0005622,intracellular|GO:0030173,integral component of Golgi membrane|GO:0032580,Golgi cisterna membrane	hsa00532 Glycosaminoglycan biosynthesis - chondroitin sulfate / dermatan sulfate - Homo sapiens (human)|hsa01100 Metabolic pathways - Homo sapiens (human)	0.656336	0.730979	0.69674	0.673934	0.719498	0.529068	0.545799	0.489346	0.576836	0.587216	0.906177	3.17202	1.55823	0.00046472	0.00612425	0.0550614
DMR_394	2	11679584	11680144	560	9	cg03877767,cg17208060,cg10899175,cg13808071,cg00031568,cg14653284,cg11534680,cg01384111,cg25380722	GREB1	TSS1500	opensea=9			GO:0016021,integral component of membrane|GO:0070062,extracellular exosome		0.449154	0.421632	0.43536	0.44259	0.437474	0.601978	0.612785	0.61906	0.649136	0.656014	0.423373	0.953946	0.653464	0.000593809	0.00700601	0.0629891
DMR_395	6	164506581	164507247	666	9	cg21306949,cg08319974,cg18108276,cg23054456,cg25815177,cg02740007,cg24400656,cg00048370,cg25694032		IGR	opensea=9					0.0694798	0.0702446	0.106387	0.0733801	0.120491	0.148063	0.121597	0.0804959	0.20542	0.221912	0.225789	0.852507	0.451803	0.000593809	0.00700601	0.0629891
DMR_396	17	48041891	48043063	1172	9	cg10336764,cg09611064,cg05882680,cg17833265,cg08278108,cg26736812,cg15557036,cg21342910,cg22778178		IGR	Island=9					0.229063	0.198092	0.289827	0.236521	0.264331	0.50009	0.366339	0.42241	0.463179	0.411433	0.456041	0.63877	0.550614	0.000602415	0.00701572	0.0630763
DMR_397	9	123631283	123632192	909	8	cg04055158,cg05834805,cg03699700,cg03808351,cg14543508,cg26821987,cg04000075,cg14425045	PHF19	TSS1500	Island=5,S_Shore=3	GO:0006351,transcription, DNA-templated|GO:0006355,regulation of transcription, DNA-templated|GO:0016569,covalent chromatin modification|GO:0045814,negative regulation of gene expression, epigenetic|GO:0061087,positive regulation of histone H3-K27 methylation	GO:0005515,protein binding|GO:0035064,methylated histone binding|GO:0046872,metal ion binding	GO:0005654,nucleoplasm|GO:0035098,ESC/E(Z) complex		0.246239	0.241289	0.234649	0.25468	0.262352	0.343076	0.27162	0.357133	0.345491	0.322459	0.225608	1.03959	0.527669	0.000679868	0.00745539	0.0670293
DMR_398	16	14402939	14403425	486	8	cg06916001,cg02533339,cg22550658,cg00928596,cg00160388,cg22388260,cg02886263,cg16484042	MIR365-1,MIR365A,	TSS1500	opensea=8					0.0905665	0.0868488	0.118105	0.093821	0.127037	0.176241	0.144481	0.115213	0.199738	0.21821	0.282624	0.965259	0.449777	0.000688474	0.00749505	0.0673859
DMR_399	1	180922629	180923683	1054	7	cg17237951,cg03069202,cg27473416,cg00579423,cg03058232,cg22776392,cg14027288		IGR	Island=5,N_Shore=2					0.0806258	0.0445606	0.0770282	0.0835738	0.138534	0.162893	0.172591	0.0729444	0.22797	0.303369	0.276491	0.619576	0.446215	0.00074011	0.00788575	0.0708986
DMR_400	2	43327937	43328657	720	7	cg14706297,cg24601559,cg00881696,cg04981619,cg05672223,cg00909401,cg03125400		IGR	Island=5,S_Shore=2					0.254418	0.205705	0.297293	0.2122	0.275524	0.419657	0.327436	0.360031	0.480204	0.44768	0.298347	0.868261	0.524275	0.000765927	0.00797237	0.0716773
DMR_401	8	49984655	49985021	366	6	cg10851715,cg24118251,cg12997242,cg11219614,cg12137156,cg06782231	C8orf22	TSS1500	opensea=6					0.0796766	0.0477267	0.0858038	0.0671972	0.0662694	0.126086	0.128248	0.0908266	0.214065	0.219748	0.301855	0.70268	0.421952	0.000748716	0.00792127	0.0712179
DMR_402	1	65467980	65468273	293	6	cg15208832,cg06748470,cg09774749,cg00600454,cg01340542,cg05522023	,LINC01359	TSS200	Island=1,N_Shore=5					0.0534237	0.0340801	0.0609035	0.0431852	0.0548296	0.132623	0.109717	0.11417	0.152207	0.185382	0.234976	1.1898	0.54882	0.000765927	0.00797237	0.0716773
DMR_403	6	33140396	33141305	909	10	cg18384402,cg13106156,cg00920162,cg20974826,cg00350615,cg21696987,cg14441262,cg18651026,cg21974506,cg00115458	COL11A2	Body	opensea=10	GO:0001501,skeletal system development|GO:0001501,skeletal system development|GO:0007605,sensory perception of sound|GO:0030199,collagen fibril organization|GO:0030574,collagen catabolic process|GO:0051216,cartilage development|GO:0060021,palate development|GO:0060023,soft palate development	GO:0005515,protein binding|GO:0030020,extracellular matrix structural constituent conferring tensile strength|GO:0030674,protein binding, bridging|GO:0046872,metal ion binding	GO:0005576,extracellular region|GO:0005592,collagen type XI trimer|GO:0005788,endoplasmic reticulum lumen	hsa04974 Protein digestion and absorption - Homo sapiens (human)	0.519506	0.438446	0.539314	0.473641	0.515481	0.723431	0.663665	0.709905	0.691542	0.680137	0.534046	0.899526	0.709	0.000602415	0.00701572	0.0630763
DMR_404	14	23290798	23291485	687	4	cg16341690,cg00818899,cg08319417,cg10845380		IGR	Island=2,N_Shore=2					0.766186	0.737185	0.772582	0.69955	0.722122	0.894033	0.885445	0.910311	0.894082	0.867084	0.745388	0.98384	0.823923	0.00088641	0.0088191	0.07929
DMR_405	14	64319089	64319306	217	4	cg20648149,cg16503753,cg10771480,cg23609375	SYNE2	TSS1500	N_Shore=4	GO:0006998,nuclear envelope organization|GO:0007097,nuclear migration|GO:0007163,establishment or maintenance of cell polarity|GO:0010761,fibroblast migration|GO:0021817,nucleokinesis involved in cell motility in cerebral cortex radial glia guided migration|GO:0030335,positive regulation of cell migration|GO:0031022,nuclear migration along microfilament|GO:0034504,protein localization to nucleus|…	GO:0003779,actin binding|GO:0005515,protein binding|GO:0051015,actin filament binding	GO:0005634,nucleus|GO:0005635,nuclear envelope|GO:0005640,nuclear outer membrane|GO:0005654,nucleoplasm|GO:0005737,cytoplasm|GO:0005739,mitochondrion|GO:0005925,focal adhesion|GO:0016021,integral component of membrane|GO:0016235,aggresome|GO:0016529,sarcoplasmic reticulum|GO:0030018,Z disc|GO:0031258,lamellipodium membrane|GO:0031527,filopodium membrane|GO:0031965,nuclear membrane|GO:0031981,nucl…		0.105994	0.0842015	0.0988274	0.0941802	0.122956	0.246798	0.190762	0.191729	0.238634	0.208313	0.373455	0.707837	0.506163	0.000903622	0.00895083	0.0804743
DMR_406	17	48912327	48912952	625	13	cg00003625,cg20889395,cg19085402,cg03905005,cg10690919,cg00463502,cg07168556,cg13655803,cg22842797,cg10408284,cg17203352,cg22469388,cg06827038	WFIKKN2	TSS1500	opensea=13	GO:0001501,skeletal system development|GO:0007179,transforming growth factor beta receptor signaling pathway|GO:0010951,negative regulation of endopeptidase activity|GO:0030512,negative regulation of transforming growth factor beta receptor signaling pathway|GO:0032091,negative regulation of protein binding|GO:0043392,negative regulation of DNA binding|GO:0048747,muscle fiber development|GO:00600…	GO:0004867,serine-type endopeptidase inhibitor activity|GO:0005515,protein binding|GO:0008191,metalloendopeptidase inhibitor activity|GO:0048019,receptor antagonist activity|GO:0050431,transforming growth factor beta binding|GO:0050431,transforming growth factor beta binding	GO:0005615,extracellular space		0.11563	0.0808273	0.144473	0.101365	0.156528	0.230904	0.196997	0.147674	0.298552	0.320604	0.321631	0.900686	0.489945	0.000395873	0.005473	0.0492062
DMR_407	17	74049600	74050288	688	9	cg14031100,cg20907091,cg13789737,cg17650909,cg18223639,cg24759044,cg16655469,cg25802006,cg22853665	SRP68	TSS1500	opensea=9	GO:0006614,SRP-dependent cotranslational protein targeting to membrane|GO:0042493,response to drug|GO:0045047,protein targeting to ER	GO:0003723,RNA binding|GO:0005047,signal recognition particle binding|GO:0005515,protein binding|GO:0008312,7S RNA binding|GO:0019904,protein domain specific binding|GO:0030942,endoplasmic reticulum signal peptide binding|GO:0043022,ribosome binding	GO:0005730,nucleolus|GO:0005783,endoplasmic reticulum|GO:0005786,signal recognition particle, endoplasmic reticulum targeting|GO:0005829,cytosol|GO:0005829,cytosol|GO:0005840,ribosome|GO:0005925,focal adhesion|GO:0048500,signal recognition particle	hsa03060 Protein export - Homo sapiens (human)	0.528761	0.576745	0.615886	0.587077	0.736612	0.417006	0.415549	0.318424	0.450175	0.630121	1.02394	1.84477	1.40912	0.000645444	0.00729077	0.0655492
DMR_408	17	7283578	7284255	677	9	cg12021221,cg06942159,cg06228200,cg17307912,cg18632631,cg05495344,cg18054943,cg02503376,cg21860689	TNK1	TSS1500	Island=1,N_Shore=8	GO:0006468,protein phosphorylation|GO:0007169,transmembrane receptor protein tyrosine kinase signaling pathway|GO:0016477,cell migration|GO:0030154,cell differentiation|GO:0030308,negative regulation of cell growth|GO:0038083,peptidyl-tyrosine autophosphorylation|GO:0042127,regulation of cell proliferation|GO:0045087,innate immune response|GO:0046580,negative regulation of Ras protein signal tran…	GO:0004713,protein tyrosine kinase activity|GO:0004715,non-membrane spanning protein tyrosine kinase activity|GO:0004715,non-membrane spanning protein tyrosine kinase activity|GO:0004871,signal transducer activity|GO:0005102,receptor binding|GO:0005515,protein binding|GO:0005524,ATP binding	GO:0005737,cytoplasm|GO:0005829,cytosol|GO:0016020,membrane|GO:0031234,extrinsic component of cytoplasmic side of plasma membrane		0.122308	0.118482	0.132774	0.120492	0.133249	0.179408	0.176383	0.157258	0.217928	0.234464	0.269342	0.928455	0.445221	0.000645444	0.00729077	0.0655492
DMR_409	13	113424938	113425756	818	7	cg17411031,cg27096043,cg21163969,cg03356537,cg02699898,cg21513610,cg00902895	ATP11A	Body	Island=1,S_Shore=6	GO:0043312,neutrophil degranulation|GO:0045332,phospholipid translocation	GO:0000287,magnesium ion binding|GO:0004012,phospholipid-translocating ATPase activity|GO:0005515,protein binding|GO:0005524,ATP binding	GO:0005765,lysosomal membrane|GO:0005769,early endosome|GO:0005783,endoplasmic reticulum|GO:0005886,plasma membrane|GO:0005886,plasma membrane|GO:0016020,membrane|GO:0016021,integral component of membrane|GO:0035579,specific granule membrane|GO:0043231,intracellular membrane-bounded organelle|GO:0055037,recycling endosome|GO:0070821,tertiary granule membrane		0.761007	0.75084	0.783022	0.740309	0.792955	0.895332	0.855299	0.89391	0.894552	0.886705	0.67112	0.965558	0.859016	0.000808957	0.0082675	0.0743308
DMR_410	7	1126903	1127767	864	6	cg03037850,cg07904865,cg08390352,cg03595161,cg11697111,cg07012460	GPER1,GPER	TSS1500	Island=1,S_Shore=5	GO:0001934,positive regulation of protein phosphorylation|GO:0001934,positive regulation of protein phosphorylation|GO:0001956,positive regulation of neurotransmitter secretion|GO:0002695,negative regulation of leukocyte activation|GO:0006954,inflammatory response|GO:0007049,cell cycle|GO:0007186,G-protein coupled receptor signaling pathway|GO:0007186,G-protein coupled receptor signaling pathway|…	GO:0003682,chromatin binding|GO:0004930,G-protein coupled receptor activity|GO:0005496,steroid binding|GO:0005515,protein binding|GO:0017082,mineralocorticoid receptor activity|GO:0030284,estrogen receptor activity|GO:1990239,steroid hormone binding,	GO:0000139,Golgi membrane|GO:0005622,intracellular|GO:0005634,nucleus|GO:0005635,nuclear envelope|GO:0005737,cytoplasm|GO:0005769,early endosome|GO:0005783,endoplasmic reticulum|GO:0005789,endoplasmic reticulum membrane|GO:0005794,Golgi apparatus|GO:0005802,trans-Golgi network|GO:0005886,plasma membrane|GO:0005886,plasma membrane|GO:0005886,plasma membrane|GO:0005887,integral component of plasma …	hsa01522 Endocrine resistance - Homo sapiens (human)|hsa04915 Estrogen signaling pathway - Homo sapiens (human),	0.03732	0.0402038	0.0502716	0.0401349	0.0552452	0.0939864	0.0949413	0.0606872	0.149302	0.178568	0.183955	0.702512	0.410546	0.000791745	0.00810999	0.0729146
DMR_411	22	41215824	41216528	704	6	cg23558213,cg00229225,cg15275890,cg17541408,cg00433579,cg26356892	SLC25A17	TSS1500	S_Shore=6	GO:0001561,fatty acid alpha-oxidation|GO:0006635,fatty acid beta-oxidation|GO:0006839,mitochondrial transport|GO:0015866,ADP transport|GO:0015867,ATP transport|GO:0015908,fatty acid transport|GO:0035349,coenzyme A transmembrane transport|GO:0035350,FAD transmembrane transport|GO:0043132,NAD transport|GO:0080121,AMP transport	GO:0000295,adenine nucleotide transmembrane transporter activity|GO:0005347,ATP transmembrane transporter activity|GO:0005515,protein binding|GO:0015217,ADP transmembrane transporter activity|GO:0015228,coenzyme A transmembrane transporter activity|GO:0015230,FAD transmembrane transporter activity|GO:0044610,FMN transmembrane transporter activity|GO:0051087,chaperone binding|GO:0051724,NAD transm…	GO:0005743,mitochondrial inner membrane|GO:0005777,peroxisome|GO:0005778,peroxisomal membrane|GO:0005778,peroxisomal membrane|GO:0005779,integral component of peroxisomal membrane|GO:0016020,membrane	hsa04146 Peroxisome - Homo sapiens (human)	0.569301	0.566225	0.561579	0.598145	0.604241	0.457015	0.44923	0.432443	0.476334	0.490175	0.860587	4.95054	1.84642	0.000826169	0.00836751	0.0752299
DMR_412	8	65490613	65491318	705	6	cg11382529,cg07923686,cg23897749,cg00924004,cg00405554,cg22884051	LOC401463,BHLHE22	TSS1500	Island=2,N_Shore=4	,GO:0006351,transcription, DNA-templated|GO:0006357,regulation of transcription from RNA polymerase II promoter|GO:0022008,neurogenesis	,GO:0000981,RNA polymerase II transcription factor activity, sequence-specific DNA binding|GO:0046983,protein dimerization activity	,GO:0005634,nucleus		0.166583	0.157885	0.167174	0.151768	0.194251	0.381178	0.299347	0.36188	0.298192	0.288471	0.307863	0.678298	0.445837	0.000877804	0.00877221	0.0788684
DMR_413	14	50864006	50864415	409	9	cg04455015,cg16408805,cg10853746,cg16671138,cg03752765,cg22794405,cg18941817,cg20467181,cg24455639	CDKL1	TSS1500	S_Shore=9	GO:0006468,protein phosphorylation|GO:0007507,heart development|GO:0051726,regulation of cell cycle	GO:0004693,cyclin-dependent protein serine/threonine kinase activity|GO:0005524,ATP binding	GO:0005634,nucleus|GO:0005654,nucleoplasm|GO:0005737,cytoplasm|GO:0043231,intracellular membrane-bounded organelle|GO:0070062,extracellular exosome		0.0226674	0.0183644	0.027215	0.0224922	0.0306282	0.0549594	0.0471207	0.0311155	0.0941004	0.0923401	0.282804	0.620633	0.415975	0.000662656	0.00732008	0.0658127
DMR_414	11	63655895	63656342	447	6	cg10345222,cg05041783,cg06204948,cg19328711,cg17998964,cg12613618	MARK2	Body	opensea=6	GO:0000226,microtubule cytoskeleton organization|GO:0000422,autophagy of mitochondrion|GO:0001764,neuron migration|GO:0006468,protein phosphorylation|GO:0006468,protein phosphorylation|GO:0010976,positive regulation of neuron projection development|GO:0016055,Wnt signaling pathway|GO:0018107,peptidyl-threonine phosphorylation|GO:0030010,establishment of cell polarity|GO:0030010,establishment of c…	GO:0000287,magnesium ion binding|GO:0003723,RNA binding|GO:0004674,protein serine/threonine kinase activity|GO:0004674,protein serine/threonine kinase activity|GO:0004674,protein serine/threonine kinase activity|GO:0005515,protein binding|GO:0005524,ATP binding|GO:0008289,lipid binding|GO:0030295,protein kinase activator activity|GO:0045296,cadherin binding|GO:0050321,tau-protein kinase activity	GO:0005654,nucleoplasm|GO:0005739,mitochondrion|GO:0005884,actin filament|GO:0005886,plasma membrane|GO:0016020,membrane|GO:0016328,lateral plasma membrane|GO:0097427,microtubule bundle		0.0225566	0.0196629	0.0280209	0.0273065	0.0332962	0.0776942	0.0532389	0.0412684	0.0906889	0.0871994	0.233203	0.718255	0.45753	0.000946652	0.00917984	0.0825333
DMR_415	1	215178601	215179070	469	6	cg13107973,cg22821560,cg05857773,cg02166981,cg11346522,cg13201279	KCNK2	TSS1500	opensea=6	GO:0003231,cardiac ventricle development|GO:0007186,G-protein coupled receptor signaling pathway|GO:0007613,memory|GO:0009612,response to mechanical stimulus|GO:0010942,positive regulation of cell death|GO:0030322,stabilization of membrane potential|GO:0048678,response to axon injury|GO:0060044,negative regulation of cardiac muscle cell proliferation|GO:0071456,cellular response to hypoxia|GO:007…	GO:0015271,outward rectifier potassium channel activity|GO:0015271,outward rectifier potassium channel activity|GO:0022841,potassium ion leak channel activity|GO:0022841,potassium ion leak channel activity	GO:0005634,nucleus|GO:0005789,endoplasmic reticulum membrane|GO:0005886,plasma membrane|GO:0005887,integral component of plasma membrane|GO:0008076,voltage-gated potassium channel complex|GO:0009986,cell surface|GO:0016324,apical plasma membrane|GO:0030424,axon|GO:0043025,neuronal cell body|GO:0044305,calyx of Held|GO:0097449,astrocyte projection	hsa04971 Gastric acid secretion - Homo sapiens (human)	0.709904	0.743534	0.745912	0.736791	0.796677	0.554016	0.613021	0.461138	0.624421	0.70411	1.17034	1.37512	1.25398	0.000946652	0.00917984	0.0825333
DMR_416	11	68611260	68611806	546	5	cg14073497,cg20562447,cg00941258,cg12778395,cg16296442		IGR	Island=5					0.152034	0.126717	0.170224	0.161523	0.197642	0.434738	0.26976	0.371087	0.354649	0.312437	0.244961	0.548002	0.449481	0.000981076	0.0093285	0.0838698
DMR_417	13	30881938	30882273	335	4	cg05482394,cg17045389,cg08215982,cg20236877	KATNAL1	TSS1500	Island=1,S_Shore=3	GO:0051013,microtubule severing	GO:0005515,protein binding|GO:0005524,ATP binding|GO:0008017,microtubule binding|GO:0008568,microtubule-severing ATPase activity|GO:0016887,ATPase activity|GO:0042802,identical protein binding	GO:0000922,spindle pole|GO:0005634,nucleus|GO:0005737,cytoplasm|GO:0005874,microtubule		0.176891	0.156345	0.195489	0.176192	0.216151	0.276449	0.233618	0.250499	0.281755	0.279422	0.33729	0.921103	0.621678	0.000946652	0.00917984	0.0825333
DMR_418	12	46663694	46664096	402	4	cg16312655,cg17090968,cg23031196,cg15306126	SLC38A1	TSS1500	S_Shore=4	GO:0001504,neurotransmitter uptake|GO:0003333,amino acid transmembrane transport|GO:0006814,sodium ion transport|GO:0006865,amino acid transport|GO:0015804,neutral amino acid transport|GO:1902475,L-alpha-amino acid transmembrane transport	GO:0005283,sodium:amino acid symporter activity|GO:0005515,protein binding|GO:0015171,amino acid transmembrane transporter activity|GO:0015171,amino acid transmembrane transporter activity|GO:0015175,neutral amino acid transmembrane transporter activity|GO:0015179,L-amino acid transmembrane transporter activity	GO:0005886,plasma membrane|GO:0005887,integral component of plasma membrane|GO:0016021,integral component of membrane|GO:0070062,extracellular exosome	hsa04724 Glutamatergic synapse - Homo sapiens (human)|hsa04727 GABAergic synapse - Homo sapiens (human)	0.350674	0.413916	0.389774	0.391792	0.442391	0.706642	0.599694	0.683675	0.613521	0.583822	0.560833	0.706994	0.618729	0.000946652	0.00917984	0.0825333
DMR_419	11	111847316	111847892	576	4	cg05291374,cg24601030,cg13983299,cg15925695	DIXDC1	TSS1500	N_Shore=4	GO:0007049,cell cycle|GO:0021799,cerebral cortex radially oriented cell migration|GO:0021869,forebrain ventricular zone progenitor cell division|GO:0032956,regulation of actin cytoskeleton organization|GO:0045665,negative regulation of neuron differentiation|GO:0060070,canonical Wnt signaling pathway|GO:0070507,regulation of microtubule cytoskeleton organization|GO:0090263,positive regulation of …	GO:0003779,actin binding|GO:0005515,protein binding|GO:0019904,protein domain specific binding|GO:0043015,gamma-tubulin binding	GO:0005829,cytosol|GO:0005925,focal adhesion		0.0543852	0.0450758	0.081727	0.0501339	0.0879343	0.142146	0.139945	0.0711296	0.196333	0.235454	0.182145	1.07921	0.534108	0.000989681	0.00935114	0.0840734
DMR_420	15	71145490	71145762	272	4	cg12870827,cg02943148,cg08023333,cg10898922	LARP6	Body	N_Shore=4	GO:0006396,RNA processing|GO:0006417,regulation of translation|GO:1902416,positive regulation of mRNA binding	GO:0005515,protein binding|GO:0048027,mRNA 5'-UTR binding|GO:1990825,sequence-specific mRNA binding	GO:0005634,nucleus|GO:0005737,cytoplasm|GO:0005844,polysome|GO:0030529,intracellular ribonucleoprotein complex		0.0489013	0.0386662	0.0656219	0.0523042	0.0808414	0.138312	0.137353	0.0632492	0.203843	0.241012	0.252271	0.526951	0.365489	0.000989681	0.00935114	0.0840734
DMR_421	11	89956675	89957167	492	8	cg26834418,cg26138821,cg22332266,cg05067963,cg09488196,cg07449543,cg04351018,cg22650867	CHORDC1	TSS1500	S_Shore=8	GO:0010824,regulation of centrosome duplication|GO:0061077,chaperone-mediated protein folding|GO:1900034,regulation of cellular response to heat|GO:2000299,negative regulation of Rho-dependent protein serine/threonine kinase activity	GO:0005515,protein binding|GO:0005524,ATP binding|GO:0008270,zinc ion binding|GO:0043531,ADP binding|GO:0051879,Hsp90 protein binding	GO:0005575,cellular_component		0.0425291	0.0885246	0.0368638	0.048224	0.0656102	0.124836	0.168041	0.112977	0.147578	0.133995	0.181425	0.650901	0.406659	0.000903622	0.00895083	0.0804743
DMR_422	11	47598986	47599466	480	7	cg18197277,cg00886996,cg03766495,cg16703737,cg20334675,cg24988264,cg17001627	KBTBD4,NDUFS3	TSS1500	N_Shore=7	GO:0030162,regulation of proteolysis|GO:0042787,protein ubiquitination involved in ubiquitin-dependent protein catabolic process|GO:0043161,proteasome-mediated ubiquitin-dependent protein catabolic process,GO:0006120,mitochondrial electron transport, NADH to ubiquinone|GO:0006120,mitochondrial electron transport, NADH to ubiquinone|GO:0021762,substantia nigra development|GO:0030308,negative regul…	GO:0031625,ubiquitin protein ligase binding,GO:0003954,NADH dehydrogenase activity|GO:0005515,protein binding|GO:0008137,NADH dehydrogenase (ubiquinone) activity|GO:0008137,NADH dehydrogenase (ubiquinone) activity|GO:0009055,electron transfer activity	GO:0005634,nucleus|GO:0005737,cytoplasm|GO:0019005,SCF ubiquitin ligase complex,GO:0005739,mitochondrion|GO:0005739,mitochondrion|GO:0005747,mitochondrial respiratory chain complex I|GO:0005747,mitochondrial respiratory chain complex I|GO:0005759,mitochondrial matrix|GO:0016604,nuclear body|GO:0031966,mitochondrial membrane|GO:0043209,myelin sheath	,hsa00190 Oxidative phosphorylation - Homo sapiens (human)|hsa01100 Metabolic pathways - Homo sapiens (human)|hsa04723 Retrograde endocannabinoid signaling - Homo sapiens (human)|hsa04932 Non-alcoholic fatty liver disease (NAFLD) - Homo sapiens (human)|hsa05010 Alzheimer's disease - Homo sapiens (human)|hsa05012 Parkinson's disease - Homo sapiens (human)|hsa05016 Huntington's disease - Homo sapie…	0.206028	0.167426	0.226591	0.191265	0.279889	0.357744	0.301834	0.297512	0.387669	0.463491	0.249433	0.764965	0.517151	0.000963864	0.00920367	0.0827476
DMR_423	12	54409207	54409491	284	7	cg18040878,cg04105511,cg15660418,cg16937769,cg04704531,cg26019295,cg22621272	HOXC4	TSS1500	S_Shore=7	GO:0006366,transcription from RNA polymerase II promoter|GO:0009952,anterior/posterior pattern specification|GO:0045944,positive regulation of transcription from RNA polymerase II promoter|GO:0048562,embryonic organ morphogenesis|GO:0051216,cartilage development	GO:0000980,RNA polymerase II distal enhancer sequence-specific DNA binding|GO:0001205,transcriptional activator activity, RNA polymerase II distal enhancer sequence-specific DNA binding|GO:0005515,protein binding|GO:0071837,HMG box domain binding	GO:0005634,nucleus		0.890904	0.907108	0.87774	0.901254	0.90967	0.817793	0.795636	0.852996	0.726084	0.740348	1.10501	1.22704	1.14215	0.00100689	0.00945431	0.085001
DMR_424	12	12223989	12224457	468	5	cg01175610,cg09379489,cg08382137,cg24921858,cg20481287	BCL2L14	5'UTR	opensea=5	GO:0006915,apoptotic process|GO:0042981,regulation of apoptotic process	GO:0005515,protein binding|GO:0019901,protein kinase binding	GO:0005829,cytosol|GO:0005829,cytosol|GO:0012505,endomembrane system|GO:0016020,membrane|GO:0043229,intracellular organelle		0.65121	0.705435	0.68707	0.705013	0.718812	0.533151	0.52068	0.508238	0.551567	0.581607	1.09631	1.70782	1.32576	0.00104992	0.00975671	0.0877198
DMR_425	18	11909294	11909634	340	3	cg14599440,cg21983255,cg21407700	MPPE1	TSS1500	S_Shore=3	GO:0006506,GPI anchor biosynthetic process|GO:0006506,GPI anchor biosynthetic process|GO:0006888,ER to Golgi vesicle-mediated transport|GO:0006888,ER to Golgi vesicle-mediated transport	GO:0005515,protein binding|GO:0008081,phosphoric diester hydrolase activity|GO:0030145,manganese ion binding|GO:0034235,GPI anchor binding	GO:0005654,nucleoplasm|GO:0005783,endoplasmic reticulum|GO:0005793,endoplasmic reticulum-Golgi intermediate compartment|GO:0005794,Golgi apparatus|GO:0005801,cis-Golgi network|GO:0016021,integral component of membrane|GO:0033116,endoplasmic reticulum-Golgi intermediate compartment membrane|GO:0070971,endoplasmic reticulum exit site		0.170436	0.205491	0.197521	0.214783	0.276913	0.0866192	0.0703706	0.0597433	0.154116	0.165243	0.163092	2.89701	1.51891	0.000955258	0.00917984	0.0825333
DMR_426	1	155179117	155179254	137	3	cg03762404,cg07161239,cg17038416	MTX1	Body	S_Shore=3	GO:0006626,protein targeting to mitochondrion		GO:0005741,mitochondrial outer membrane|GO:0016021,integral component of membrane		0.0837757	0.0773272	0.0754132	0.0655308	0.11042	0.0399012	0.0276407	0.0273449	0.0312821	0.0321831	2.1966	3.06006	2.72007	0.000955258	0.00917984	0.0825333
DMR_427	3	49170498	49170794	296	5	cg04885759,cg14099457,cg02954987,cg05654765,cg08234664	LAMB2	TSS200	opensea=5	GO:0007155,cell adhesion|GO:0007411,axon guidance|GO:0007528,neuromuscular junction development|GO:0007601,visual perception|GO:0014002,astrocyte development|GO:0014044,Schwann cell development|GO:0030198,extracellular matrix organization|GO:0043687,post-translational protein modification|GO:0044267,cellular protein metabolic process|GO:0048677,axon extension involved in regeneration|GO:0060041,r…	GO:0005178,integrin binding|GO:0005198,structural molecule activity	GO:0005576,extracellular region|GO:0005604,basement membrane|GO:0005605,basal lamina|GO:0005608,laminin-3 complex|GO:0005788,endoplasmic reticulum lumen|GO:0031012,extracellular matrix|GO:0031012,extracellular matrix|GO:0031012,extracellular matrix|GO:0043083,synaptic cleft|GO:0043260,laminin-11 complex|GO:0070062,extracellular exosome	hsa04151 PI3K-Akt signaling pathway - Homo sapiens (human)|hsa04510 Focal adhesion - Homo sapiens (human)|hsa04512 ECM-receptor interaction - Homo sapiens (human)|hsa05145 Toxoplasmosis - Homo sapiens (human)|hsa05146 Amoebiasis - Homo sapiens (human)|hsa05200 Pathways in cancer - Homo sapiens (human)|hsa05222 Small cell lung cancer - Homo sapiens (human)	0.0581341	0.0762144	0.0672236	0.083387	0.075438	0.105936	0.0834465	0.0925941	0.115162	0.141527	0.314823	1.02698	0.509628	0.00108435	0.00991308	0.0891257
DMR_428	7	129007902	129008407	505	4	cg15664152,cg11961845,cg17827670,cg22584802	AHCYL2	Body	opensea=4	GO:0006730,one-carbon metabolic process|GO:0033353,S-adenosylmethionine cycle	GO:0004013,adenosylhomocysteinase activity|GO:0005515,protein binding	GO:0005783,endoplasmic reticulum|GO:0005829,cytosol|GO:0043005,neuron projection	hsa00270 Cysteine and methionine metabolism - Homo sapiens (human)|hsa01100 Metabolic pathways - Homo sapiens (human)	0.0791414	0.0623629	0.0839431	0.0935134	0.0992496	0.253772	0.172377	0.186124	0.211898	0.187355	0.379375	0.543084	0.462825	0.0011618	0.0102827	0.0924487
DMR_429	21	30502731	30502808	77	4	cg02416873,cg15433195,cg15251010,cg16999170	MAP3K7CL	TSS200	opensea=4	GO:0000165,MAPK cascade|GO:0000186,activation of MAPKK activity	GO:0004709,MAP kinase kinase kinase activity|GO:0005515,protein binding	GO:0005634,nucleus|GO:0005829,cytosol		0.435438	0.576309	0.519795	0.532584	0.534131	0.227121	0.292252	0.205491	0.41396	0.47242	1.43515	1.84993	1.60988	0.00121344	0.0105987	0.0952903
DMR_430	13	110802517	110802645	128	3	cg15258722,cg12081643,cg07075061	COL4A1	3'UTR	opensea=3	GO:0001569,branching involved in blood vessel morphogenesis|GO:0007420,brain development|GO:0007528,neuromuscular junction development|GO:0030198,extracellular matrix organization|GO:0030574,collagen catabolic process|GO:0030855,epithelial cell differentiation|GO:0038063,collagen-activated tyrosine kinase receptor signaling pathway|GO:0048514,blood vessel morphogenesis|GO:0061304,retinal blood ve…	GO:0005201,extracellular matrix structural constituent|GO:0005515,protein binding|GO:0030023,extracellular matrix constituent conferring elasticity|GO:0048407,platelet-derived growth factor binding	GO:0005576,extracellular region|GO:0005576,extracellular region|GO:0005587,collagen type IV trimer|GO:0005604,basement membrane|GO:0005615,extracellular space|GO:0005788,endoplasmic reticulum lumen|GO:0031012,extracellular matrix|GO:0031012,extracellular matrix	hsa04151 PI3K-Akt signaling pathway - Homo sapiens (human)|hsa04510 Focal adhesion - Homo sapiens (human)|hsa04512 ECM-receptor interaction - Homo sapiens (human)|hsa04933 AGE-RAGE signaling pathway in diabetic complications - Homo sapiens (human)|hsa04974 Protein digestion and absorption - Homo sapiens (human)|hsa05146 Amoebiasis - Homo sapiens (human)|hsa05200 Pathways in cancer - Homo sapiens …	0.958446	0.965709	0.963388	0.957111	0.96168	0.926737	0.923286	0.939317	0.908429	0.906346	0.99291	1.12051	1.04807	0.000989681	0.00935114	0.0840734
DMR_431	10	21463485	21463858	373	3	cg24625388,cg18192417,cg23565942	NEBL	TSS1500	Island=2,S_Shore=1	GO:0071691,cardiac muscle thin filament assembly	GO:0005515,protein binding|GO:0005523,tropomyosin binding|GO:0008092,cytoskeletal protein binding|GO:0008092,cytoskeletal protein binding|GO:0008307,structural constituent of muscle|GO:0031005,filamin binding|GO:0051015,actin filament binding	GO:0001725,stress fiber|GO:0030018,Z disc|GO:0031674,I band|GO:0070062,extracellular exosome		0.056178	0.0511512	0.0661944	0.0502243	0.0635903	0.176402	0.133263	0.144448	0.152399	0.128984	0.280611	0.538763	0.406062	0.00102411	0.00955619	0.085917
DMR_432	19	46916520	46917255	735	10	cg11715966,cg18653451,cg25987744,cg20071868,cg20265803,cg03576469,cg15984661,cg11125714,cg06747432,cg02512703	CCDC8	TSS1500	Island=2,N_Shore=1,S_Shore=7	GO:0000226,microtubule cytoskeleton organization|GO:0007088,regulation of mitotic nuclear division|GO:0010923,negative regulation of phosphatase activity|GO:0043687,post-translational protein modification	GO:0005515,protein binding	GO:0005634,nucleus|GO:0005737,cytoplasm|GO:0005813,centrosome|GO:0005829,cytosol|GO:0005829,cytosol|GO:0005886,plasma membrane|GO:1990393,3M complex		0.0437124	0.0507267	0.0502026	0.0560585	0.0538172	0.0954718	0.0805341	0.103436	0.113419	0.122068	0.228912	0.7848	0.485221	0.000688474	0.00749505	0.0673859
DMR_433	12	117626777	117627478	701	9	cg26470309,cg12414070,cg19256813,cg09257011,cg06283304,cg01817067,cg08857351,cg21737773,cg02486646	FBXO21	Body	N_Shore=9	GO:0000209,protein polyubiquitination|GO:0006511,ubiquitin-dependent protein catabolic process|GO:0043687,post-translational protein modification	GO:0003677,DNA binding|GO:0004842,ubiquitin-protein transferase activity|GO:0004842,ubiquitin-protein transferase activity|GO:0004842,ubiquitin-protein transferase activity	GO:0000151,ubiquitin ligase complex|GO:0005829,cytosol		0.107287	0.0887207	0.132999	0.087754	0.110469	0.172539	0.194466	0.130338	0.239031	0.253085	0.220086	0.992838	0.528936	0.00069708	0.00753415	0.0677374
DMR_434	16	59788728	59789485	757	8	cg17890255,cg08177968,cg03581422,cg13027458,cg02947418,cg02782052,cg06612122,cg04946709	APOOP5,LOC644649	TSS1500	Island=5,N_Shore=1,S_Shore=2					0.843714	0.877868	0.862007	0.900532	0.894107	0.74952	0.754162	0.704017	0.834325	0.847083	1.01753	1.34959	1.1392	0.000920834	0.00906157	0.08147
DMR_435	17	30814814	30815228	414	4	cg18473137,cg03898962,cg22075970,cg19634527	CDK5R1	Body	Island=4	GO:0000079,regulation of cyclin-dependent protein serine/threonine kinase activity|GO:0001764,neuron migration|GO:0007158,neuron cell-cell adhesion|GO:0007213,G-protein coupled acetylcholine receptor signaling pathway|GO:0007411,axon guidance|GO:0007413,axonal fasciculation|GO:0007420,brain development|GO:0007420,brain development|GO:0008283,cell proliferation|GO:0009790,embryo development|GO:001…	GO:0004672,protein kinase activity|GO:0005509,calcium ion binding|GO:0005515,protein binding|GO:0016301,kinase activity|GO:0016534,cyclin-dependent protein kinase 5 activator activity|GO:0019901,protein kinase binding|GO:0043539,protein serine/threonine kinase activator activity|GO:0043539,protein serine/threonine kinase activator activity|GO:0045296,cadherin binding|GO:0046875,ephrin receptor bi…	GO:0005634,nucleus|GO:0005654,nucleoplasm|GO:0005654,nucleoplasm|GO:0005737,cytoplasm|GO:0005829,cytosol|GO:0005886,plasma membrane|GO:0014069,postsynaptic density|GO:0016020,membrane|GO:0016533,cyclin-dependent protein kinase 5 holoenzyme complex|GO:0030424,axon|GO:0030425,dendrite|GO:0030426,growth cone|GO:0031594,neuromuscular junction|GO:0043025,neuronal cell body|GO:0043197,dendritic spine|G…	hsa05010 Alzheimer's disease - Homo sapiens (human)|hsa05030 Cocaine addiction - Homo sapiens (human)	0.266761	0.244239	0.290513	0.2494	0.297869	0.450775	0.395081	0.431344	0.482544	0.494945	0.36274	0.782891	0.564826	0.00126507	0.0107986	0.0970874
DMR_436	4	57547347	57548290	943	9	cg25456368,cg05155922,cg02193015,cg16975863,cg04085076,cg20627541,cg00493422,cg06771126,cg02305203	HOPX	TSS1500	opensea=9	GO:0001829,trophectodermal cell differentiation|GO:0006351,transcription, DNA-templated|GO:0006357,regulation of transcription from RNA polymerase II promoter|GO:0045596,negative regulation of cell differentiation|GO:0051131,chaperone-mediated protein complex assembly	GO:0003677,DNA binding|GO:0005515,protein binding	GO:0005634,nucleus|GO:0005737,cytoplasm		0.1419	0.154488	0.167504	0.16364	0.19068	0.299502	0.269934	0.247673	0.344142	0.364318	0.326537	0.75994	0.493967	0.00074011	0.00788575	0.0708986
DMR_437	5	150284416	150284634	218	9	cg14974262,cg02343823,cg18237551,cg04675542,cg26486466,cg11291313,cg04032578,cg12777992,cg08580836	ZNF300	TSS1500	Island=9	GO:0006355,regulation of transcription, DNA-templated|GO:0006366,transcription from RNA polymerase II promoter|GO:0045944,positive regulation of transcription from RNA polymerase II promoter	GO:0001228,transcriptional activator activity, RNA polymerase II transcription regulatory region sequence-specific DNA binding|GO:0003700,DNA binding transcription factor activity|GO:0005515,protein binding|GO:0043565,sequence-specific DNA binding|GO:0046872,metal ion binding	GO:0005634,nucleus|GO:0005730,nucleolus		0.0528872	0.0404248	0.0512475	0.0442825	0.0507212	0.0961162	0.0849447	0.112124	0.132353	0.146508	0.3089	0.592666	0.437862	0.000757321	0.00797237	0.0716773
DMR_438	17	40337513	40337892	379	9	cg03032532,cg15182955,cg13337307,cg20372821,cg19057309,cg05159732,cg06753606,cg27105465,cg13045482	HCRT	TSS1500	S_Shore=9	GO:0001659,temperature homeostasis|GO:0007186,G-protein coupled receptor signaling pathway|GO:0007200,phospholipase C-activating G-protein coupled receptor signaling pathway|GO:0007204,positive regulation of cytosolic calcium ion concentration|GO:0007205,protein kinase C-activating G-protein coupled receptor signaling pathway|GO:0007218,neuropeptide signaling pathway|GO:0007268,chemical synaptic …	GO:0005184,neuropeptide hormone activity|GO:0031771,type 1 hypocretin receptor binding|GO:0031772,type 2 hypocretin receptor binding	GO:0005576,extracellular region|GO:0005791,rough endoplasmic reticulum|GO:0008021,synaptic vesicle|GO:0030054,cell junction|GO:0030141,secretory granule|GO:0048471,perinuclear region of cytoplasm|GO:0098794,postsynapse		0.415147	0.429545	0.462832	0.417052	0.465853	0.661349	0.590449	0.623979	0.648588	0.631445	0.486489	0.85943	0.681209	0.000765927	0.00797237	0.0716773
DMR_439	10	125650957	125651621	664	9	cg09619146,cg12164321,cg14676407,cg27003782,cg08615567,cg05801246,cg13702196,cg16197717,cg03630088	CPXM2	TSS200	Island=4,S_Shore=5	GO:0006518,peptide metabolic process|GO:0016485,protein processing	GO:0004181,metallocarboxypeptidase activity|GO:0004185,serine-type carboxypeptidase activity|GO:0008270,zinc ion binding	GO:0005615,extracellular space|GO:0031012,extracellular matrix		0.180324	0.183399	0.178808	0.164614	0.203147	0.348148	0.27468	0.338052	0.294992	0.299989	0.195915	0.847589	0.553669	0.000774533	0.00798815	0.0718192
DMR_440	3	39850057	39850505	448	9	cg06679261,cg14261008,cg07322925,cg07669891,cg27308746,cg07251589,cg27549834,cg06991263,cg18409406	MYRIP	TSS1500	N_Shore=9	GO:0006886,intracellular protein transport|GO:0030050,vesicle transport along actin filament|GO:0032024,positive regulation of insulin secretion	GO:0003779,actin binding|GO:0005515,protein binding|GO:0008270,zinc ion binding|GO:0017022,myosin binding|GO:0017137,Rab GTPase binding|GO:0051018,protein kinase A binding	GO:0000145,exocyst|GO:0001750,photoreceptor outer segment|GO:0030133,transport vesicle|GO:0030864,cortical actin cytoskeleton|GO:0031045,dense core granule|GO:0042470,melanosome|GO:0045202,synapse|GO:0048471,perinuclear region of cytoplasm		0.0899778	0.0801475	0.115534	0.0761458	0.098706	0.219616	0.199971	0.183238	0.168481	0.181016	0.328345	0.793337	0.545256	0.000791745	0.00810999	0.0729146
DMR_441	19	45737483	45738115	632	9	cg01565314,cg08882547,cg02006647,cg12009516,cg09450024,cg00449767,cg14876077,cg14184817,cg21631754	EXOC3L2	TSS1500	Island=9	GO:0006887,exocytosis|GO:0008150,biological_process|GO:0051601,exocyst localization	GO:0000149,SNARE binding|GO:0003674,molecular_function	GO:0000145,exocyst|GO:0005575,cellular_component		0.239088	0.160713	0.275882	0.17298	0.218283	0.369139	0.346324	0.364258	0.42573	0.435926	0.397133	0.790964	0.520882	0.000817563	0.00833655	0.0749516
DMR_442	17	75471105	75471491	386	7	cg10997810,cg14773822,cg16398747,cg16293484,cg19948701,cg15229994,cg20030711	SEPT9	TSS1500	opensea=7	GO:0007049,cell cycle|GO:0051291,protein heterooligomerization|GO:0051301,cell division|GO:1902857,positive regulation of non-motile cilium assembly	GO:0003924,GTPase activity|GO:0005515,protein binding|GO:0005525,GTP binding|GO:0045296,cadherin binding	GO:0001725,stress fiber|GO:0005737,cytoplasm|GO:0005874,microtubule|GO:0005930,axoneme|GO:0015629,actin cytoskeleton|GO:0031105,septin complex|GO:0048471,perinuclear region of cytoplasm|GO:0097730,non-motile cilium		0.563589	0.705906	0.640955	0.659863	0.782303	0.461726	0.362995	0.323019	0.523175	0.562405	1.28385	1.97568	1.53424	0.00106713	0.00981546	0.088248
DMR_443	15	39871808	39872186	378	7	cg08433504,cg08293324,cg10078511,cg23849826,cg25503381,cg25499543,cg23116540	THBS1	TSS1500	N_Shore=7	GO:0000187,activation of MAPK activity|GO:0001666,response to hypoxia|GO:0001937,negative regulation of endothelial cell proliferation|GO:0001937,negative regulation of endothelial cell proliferation|GO:0001953,negative regulation of cell-matrix adhesion|GO:0002040,sprouting angiogenesis|GO:0002544,chronic inflammatory response|GO:0002576,platelet degranulation|GO:0002581,negative regulation of a…	GO:0001786,phosphatidylserine binding|GO:0001968,fibronectin binding|GO:0005178,integrin binding|GO:0005509,calcium ion binding|GO:0005515,protein binding|GO:0008201,heparin binding|GO:0017134,fibroblast growth factor binding|GO:0030169,low-density lipoprotein particle binding|GO:0042802,identical protein binding|GO:0043236,laminin binding|GO:0043394,proteoglycan binding|GO:0050431,transforming g…	GO:0005576,extracellular region|GO:0005576,extracellular region|GO:0005577,fibrinogen complex|GO:0005615,extracellular space|GO:0005783,endoplasmic reticulum|GO:0005788,endoplasmic reticulum lumen|GO:0009897,external side of plasma membrane|GO:0009986,cell surface|GO:0016529,sarcoplasmic reticulum|GO:0030141,secretory granule|GO:0031012,extracellular matrix|GO:0031012,extracellular matrix|GO:0031…	hsa04015 Rap1 signaling pathway - Homo sapiens (human)|hsa04115 p53 signaling pathway - Homo sapiens (human)|hsa04145 Phagosome - Homo sapiens (human)|hsa04151 PI3K-Akt signaling pathway - Homo sapiens (human)|hsa04350 TGF-beta signaling pathway - Homo sapiens (human)|hsa04510 Focal adhesion - Homo sapiens (human)|hsa04512 ECM-receptor interaction - Homo sapiens (human)|hsa05144 Malaria - Homo sa…	0.060799	0.0435709	0.0808017	0.0623397	0.0922155	0.136887	0.129375	0.0776587	0.213303	0.253351	0.205291	0.816131	0.407348	0.00108435	0.00991308	0.0891257
DMR_444	14	37135101	37135435	334	3	cg09814975,cg17365391,cg04994761	PAX9	Body	N_Shore=3	GO:0006366,transcription from RNA polymerase II promoter|GO:0007492,endoderm development|GO:0042476,odontogenesis|GO:0042481,regulation of odontogenesis|GO:0045892,negative regulation of transcription, DNA-templated|GO:0045944,positive regulation of transcription from RNA polymerase II promoter|GO:0060325,face morphogenesis|GO:0071363,cellular response to growth factor stimulus	GO:0000977,RNA polymerase II regulatory region sequence-specific DNA binding|GO:0001228,transcriptional activator activity, RNA polymerase II transcription regulatory region sequence-specific DNA binding|GO:0005515,protein binding	GO:0005634,nucleus		0.832768	0.858211	0.8463	0.846426	0.860342	0.719502	0.638872	0.772874	0.72702	0.706674	1.16051	1.22266	1.18913	0.00106713	0.00981546	0.088248
DMR_445	2	62422633	62422808	175	3	cg11194220,cg02602480,cg05730283	B3GNT2	TSS1500	Island=3	GO:0007411,axon guidance|GO:0007608,sensory perception of smell|GO:0016266,O-glycan processing|GO:0018146,keratan sulfate biosynthetic process|GO:0030311,poly-N-acetyllactosamine biosynthetic process|GO:1990830,cellular response to leukemia inhibitory factor	GO:0008499,UDP-galactose:beta-N-acetylglucosamine beta-1,3-galactosyltransferase activity|GO:0008532,N-acetyllactosaminide beta-1,3-N-acetylglucosaminyltransferase activity|GO:0008532,N-acetyllactosaminide beta-1,3-N-acetylglucosaminyltransferase activity	GO:0000139,Golgi membrane|GO:0016021,integral component of membrane|GO:0070062,extracellular exosome	hsa00533 Glycosaminoglycan biosynthesis - keratan sulfate - Homo sapiens (human)|hsa00601 Glycosphingolipid biosynthesis - lacto and neolacto series - Homo sapiens (human)|hsa01100 Metabolic pathways - Homo sapiens (human)	0.0754755	0.0664101	0.0750581	0.0740345	0.111308	0.0331375	0.0298489	0.0186949	0.0317242	0.0403072	0.986948	3.46979	2.23186	0.00106713	0.00981546	0.088248
DMR_446	6	31894555	31895598	1043	10	cg27297326,cg14301635,cg19176285,cg20371401,cg24654874,cg00588517,cg08227896,cg06491405,cg04498679,cg21895450	C2	TSS1500	opensea=10	GO:0006508,proteolysis|GO:0006956,complement activation|GO:0006956,complement activation|GO:0006958,complement activation, classical pathway|GO:0007584,response to nutrient|GO:0030449,regulation of complement activation|GO:0045087,innate immune response|GO:2000427,positive regulation of apoptotic cell clearance	GO:0004252,serine-type endopeptidase activity|GO:0005515,protein binding|GO:0046872,metal ion binding	GO:0005576,extracellular region|GO:0005615,extracellular space|GO:0070062,extracellular exosome	hsa04610 Complement and coagulation cascades - Homo sapiens (human)|hsa05133 Pertussis - Homo sapiens (human)|hsa05150 Staphylococcus aureus infection - Homo sapiens (human)|hsa05322 Systemic lupus erythematosus - Homo sapiens (human)	0.536182	0.55528	0.561649	0.579112	0.622109	0.319375	0.345383	0.321335	0.418904	0.494106	1.13213	2.10791	1.56482	0.000765927	0.00797237	0.0716773
DMR_447	17	202348	203087	739	10	cg25255204,cg19131699,cg02908707,cg02671171,cg00959309,cg13702144,cg25216634,cg04892570,cg25170091,cg13175778	RPH3AL	TSS1500	N_Shelf=10	GO:0006886,intracellular protein transport|GO:0006887,exocytosis|GO:0017158,regulation of calcium ion-dependent exocytosis|GO:0042493,response to drug|GO:0042593,glucose homeostasis|GO:0045744,negative regulation of G-protein coupled receptor protein signaling pathway|GO:0050714,positive regulation of protein secretion	GO:0005509,calcium ion binding|GO:0005515,protein binding|GO:0005544,calcium-dependent phospholipid binding|GO:0008092,cytoskeletal protein binding|GO:0017137,Rab GTPase binding|GO:0030274,LIM domain binding	GO:0005737,cytoplasm|GO:0005886,plasma membrane|GO:0030658,transport vesicle membrane|GO:0030667,secretory granule membrane		0.0574798	0.047769	0.0788105	0.086909	0.117316	0.176644	0.120561	0.0747839	0.183771	0.210858	0.284449	1.07117	0.532454	0.000765927	0.00797237	0.0716773
DMR_448	6	30698706	30698987	281	10	cg16646298,cg19448318,cg17988780,cg18760837,cg02684104,cg16254746,cg10513302,cg05681859,cg04353171,cg19110902	FLOT1	Body	opensea=10	GO:0001765,membrane raft assembly|GO:0001819,positive regulation of cytokine production|GO:0001934,positive regulation of protein phosphorylation|GO:0002090,regulation of receptor internalization|GO:0007409,axonogenesis|GO:0022617,extracellular matrix disassembly|GO:0032092,positive regulation of protein binding|GO:0032226,positive regulation of synaptic transmission, dopaminergic|GO:0032728,posi…	GO:0002020,protease binding|GO:0005515,protein binding|GO:0035255,ionotropic glutamate receptor binding|GO:0046982,protein heterodimerization activity	GO:0001931,uropod|GO:0005765,lysosomal membrane|GO:0005768,endosome|GO:0005769,early endosome|GO:0005815,microtubule organizing center|GO:0005886,plasma membrane|GO:0005886,plasma membrane|GO:0005901,caveola|GO:0005911,cell-cell junction|GO:0005913,cell-cell adherens junction|GO:0005925,focal adhesion|GO:0008180,COP9 signalosome|GO:0016020,membrane|GO:0016021,integral component of membrane|GO:001…	hsa04910 Insulin signaling pathway - Homo sapiens (human)	0.332528	0.351171	0.3368	0.327846	0.325063	0.592438	0.54331	0.607603	0.512318	0.467948	0.39588	0.850785	0.595515	0.000826169	0.00836751	0.0752299
DMR_449	1	154127462	154128041	579	8	cg19437677,cg11718162,cg19757176,cg17383186,cg17167920,cg03352427,cg16274678,cg00006626	TPM3,NUP210L	TSS200	opensea=8	GO:0006928,movement of cell or subcellular component|GO:0006936,muscle contraction|GO:0006936,muscle contraction|GO:0007015,actin filament organization|GO:0030049,muscle filament sliding,GO:0007286,spermatid development|GO:0060009,Sertoli cell development	GO:0003674,molecular_function|GO:0005515,protein binding|GO:0008307,structural constituent of muscle|GO:0051015,actin filament binding,	GO:0001725,stress fiber|GO:0005829,cytosol|GO:0005829,cytosol|GO:0005856,cytoskeleton|GO:0005856,cytoskeleton|GO:0005862,muscle thin filament tropomyosin|GO:0005884,actin filament|GO:0015629,actin cytoskeleton|GO:0070062,extracellular exosome,GO:0016021,integral component of membrane	hsa04260 Cardiac muscle contraction - Homo sapiens (human)|hsa04261 Adrenergic signaling in cardiomyocytes - Homo sapiens (human)|hsa05200 Pathways in cancer - Homo sapiens (human)|hsa05216 Thyroid cancer - Homo sapiens (human)|hsa05410 Hypertrophic cardiomyopathy (HCM) - Homo sapiens (human)|hsa05414 Dilated cardiomyopathy - Homo sapiens (human),hsa03013 RNA transport - Homo sapiens (human)	0.225826	0.133592	0.20076	0.190922	0.224079	0.286477	0.263738	0.307929	0.333786	0.38287	0.207633	0.776342	0.497098	0.000955258	0.00917984	0.0825333
DMR_450	12	116996359	116996931	572	5	cg11185549,cg19554257,cg26812615,cg18630390,cg23368778	MAP1LC3B2	TSS1500	opensea=5	GO:0000045,autophagosome assembly|GO:0000422,autophagy of mitochondrion|GO:0006995,cellular response to nitrogen starvation		GO:0000421,autophagosome membrane|GO:0005829,cytosol|GO:0005874,microtubule|GO:0012505,endomembrane system|GO:0031410,cytoplasmic vesicle		0.722708	0.726132	0.713778	0.745084	0.760122	0.539213	0.543667	0.523572	0.545319	0.581703	1.02614	2.53697	1.69347	0.00122204	0.0106327	0.0955956
DMR_451	2	26401598	26401878	280	5	cg04944784,cg26314531,cg22920501,cg08470875,cg04902443	FAM59B,GAREML	Body	Island=3,N_Shore=2					0.107223	0.0833655	0.128725	0.154274	0.203994	0.0712874	0.0692238	0.0430527	0.0569632	0.109625	1.40469	3.29962	2.29678	0.00122204	0.0106327	0.0955956
DMR_452	8	49647579	49648436	857	11	cg16571825,cg11469098,cg04740211,cg05751110,cg25342894,cg25457832,cg11868900,cg22836229,cg18041435,cg08258526,cg15397374	EFCAB1	TSS1500	Island=5,N_Shore=1,S_Shore=5		GO:0005509,calcium ion binding			0.0929863	0.0978115	0.105531	0.0993485	0.109308	0.175755	0.162354	0.16309	0.179231	0.180902	0.276076	0.700117	0.494531	0.000628233	0.00718641	0.0646109
DMR_453	20	19866743	19867145	402	8	cg09110922,cg23501964,cg11267810,cg13396318,cg09219364,cg20918393,cg25291653,cg24737324		IGR	opensea=8					0.481574	0.470116	0.546951	0.502038	0.576288	0.32698	0.306032	0.253477	0.343099	0.404444	1.23888	2.12834	1.63737	0.00100689	0.00945431	0.085001
DMR_454	17	19651631	19652056	425	8	cg15175179,cg25848064,cg15726326,cg25145360,cg01614658,cg00855466,cg00516966,cg08974518	ALDH3A1	TSS1500	S_Shelf=8	GO:0001666,response to hypoxia|GO:0006081,cellular aldehyde metabolic process|GO:0006805,xenobiotic metabolic process|GO:0007568,aging|GO:0007584,response to nutrient|GO:0008284,positive regulation of cell proliferation|GO:0042493,response to drug|GO:0051384,response to glucocorticoid|GO:0051591,response to cAMP|GO:0055114,oxidation-reduction process	GO:0004028,3-chloroallyl aldehyde dehydrogenase activity|GO:0004029,aldehyde dehydrogenase (NAD) activity|GO:0004030,aldehyde dehydrogenase [NAD(P)+] activity|GO:0005515,protein binding|GO:0008106,alcohol dehydrogenase (NADP+) activity|GO:0018479,benzaldehyde dehydrogenase (NAD+) activity	GO:0005615,extracellular space|GO:0005783,endoplasmic reticulum|GO:0005829,cytosol|GO:0005829,cytosol|GO:0005829,cytosol|GO:0005886,plasma membrane|GO:0016021,integral component of membrane	hsa00010 Glycolysis / Gluconeogenesis - Homo sapiens (human)|hsa00340 Histidine metabolism - Homo sapiens (human)|hsa00350 Tyrosine metabolism - Homo sapiens (human)|hsa00360 Phenylalanine metabolism - Homo sapiens (human)|hsa00410 beta-Alanine metabolism - Homo sapiens (human)|hsa00980 Metabolism of xenobiotics by cytochrome P450 - Homo sapiens (human)|hsa00982 Drug metabolism - cytochrome P450 …	0.0677368	0.0603073	0.105025	0.0780892	0.102368	0.197968	0.15777	0.126696	0.25232	0.280015	0.208455	0.593995	0.386752	0.0010155	0.00949555	0.0853718
DMR_455	9	34381386	34381797	411	4	cg23248377,cg12554569,cg10268241,cg15295766	C9orf24	TSS200	S_Shore=4	GO:0007283,spermatogenesis|GO:0030154,cell differentiation|GO:0043623,cellular protein complex assembly	GO:0005515,protein binding|GO:0043014,alpha-tubulin binding	GO:0002177,manchette|GO:0005634,nucleus|GO:0048471,perinuclear region of cytoplasm		0.325534	0.250396	0.313452	0.300003	0.295229	0.487042	0.449708	0.447026	0.504097	0.466601	0.345783	0.785771	0.558885	0.00131671	0.0110923	0.099728
DMR_456	15	99790878	99791109	231	4	cg02467858,cg00826495,cg23600866,cg11635359	TTC23	TSS1500	N_Shore=4		GO:0005515,protein binding			0.0290296	0.0235238	0.0332434	0.0310464	0.0342954	0.0429066	0.034577	0.0359148	0.0755869	0.0773568	0.279983	1.21705	0.589552	0.00134252	0.0112259	0.100929
DMR_457	5	60458778	60458894	116	3	cg10338475,cg09645336,cg13028113	SMIM15,C5orf43	TSS1500	S_Shore=3			GO:0016021,integral component of membrane,		0.0322722	0.0280177	0.0507083	0.034696	0.0668625	0.140825	0.106509	0.0796543	0.179514	0.22912	0.199543	0.439414	0.313746	0.00108435	0.00991308	0.0891257
DMR_458	3	137834755	137835011	256	3	cg15655868,cg24168516,cg21459229	DZIP1L	TSS1500	S_Shore=3	GO:0032880,regulation of protein localization|GO:0060271,cilium assembly	GO:0003676,nucleic acid binding|GO:0005515,protein binding|GO:0046872,metal ion binding	GO:0005814,centriole|GO:0005814,centriole|GO:0036064,ciliary basal body		0.0585762	0.0334618	0.0566581	0.0550611	0.0638266	0.132992	0.118487	0.0930403	0.161578	0.203155	0.317152	0.928878	0.529134	0.00109295	0.00997153	0.0896512
DMR_459	1	91870389	91870713	324	3	cg09737265,cg09077757,cg27594756	HFM1	TSS1500	Island=1,S_Shore=2	GO:0000712,resolution of meiotic recombination intermediates|GO:0010501,RNA secondary structure unwinding	GO:0003676,nucleic acid binding|GO:0004004,ATP-dependent RNA helicase activity|GO:0005524,ATP binding	GO:0005730,nucleolus|GO:0005737,cytoplasm		0.123052	0.0948116	0.111303	0.113574	0.129746	0.328922	0.297501	0.259247	0.273283	0.234323	0.208548	0.67854	0.446016	0.00115319	0.0102716	0.0923493
DMR_460	11	102826382	102827000	618	9	cg19710916,cg10085326,cg17092532,cg14995062,cg19620758,cg02498544,cg22658979,cg03067994,cg18830224	MMP13	TSS1500	opensea=9	GO:0001958,endochondral ossification|GO:0003417,growth plate cartilage development|GO:0006508,proteolysis|GO:0022617,extracellular matrix disassembly|GO:0022617,extracellular matrix disassembly|GO:0030282,bone mineralization|GO:0030574,collagen catabolic process|GO:0030574,collagen catabolic process|GO:0044267,cellular protein metabolic process|GO:0060349,bone morphogenesis	GO:0004222,metalloendopeptidase activity|GO:0004222,metalloendopeptidase activity|GO:0004252,serine-type endopeptidase activity|GO:0005509,calcium ion binding|GO:0005518,collagen binding|GO:0008270,zinc ion binding	GO:0005576,extracellular region|GO:0005578,proteinaceous extracellular matrix|GO:0005615,extracellular space	hsa04657 IL-17 signaling pathway - Homo sapiens (human)	0.767392	0.783185	0.803804	0.817465	0.870612	0.596027	0.547609	0.554289	0.726018	0.768968	1.00468	2.26304	1.44108	0.000851987	0.00857121	0.0770613
DMR_461	4	183061830	183062729	899	9	cg09795809,cg18304448,cg23370946,cg02353258,cg08985979,cg07493858,cg03867465,cg15590989,cg11393122	MGC45800	Body	Island=2,N_Shore=7					0.732362	0.817027	0.773633	0.702015	0.742383	0.566825	0.608401	0.679538	0.585881	0.597076	1.15127	1.51522	1.26157	0.000851987	0.00857121	0.0770613
DMR_462	22	45704550	45705265	715	9	cg24477255,cg06575572,cg15477144,cg00643333,cg22160612,cg17795059,cg12262698,cg06315390,cg01404067	FAM118A	TSS1500	N_Shore=9		GO:0005515,protein binding|GO:0042802,identical protein binding	GO:0016021,integral component of membrane		0.367961	0.398932	0.36999	0.391295	0.406059	0.542149	0.528723	0.557029	0.504736	0.526278	0.279318	0.943595	0.624599	0.000851987	0.00857121	0.0770613
DMR_463	7	56160528	56161020	492	8	cg15307593,cg19759064,cg05724065,cg21940640,cg26422861,cg17603988,cg15666071,cg09872392	PHKG1	TSS1500	opensea=8	GO:0005975,carbohydrate metabolic process|GO:0005977,glycogen metabolic process|GO:0005978,glycogen biosynthetic process|GO:0005980,glycogen catabolic process|GO:0018105,peptidyl-serine phosphorylation|GO:0018107,peptidyl-threonine phosphorylation|GO:0035556,intracellular signal transduction	GO:0004689,phosphorylase kinase activity|GO:0005516,calmodulin binding|GO:0005524,ATP binding|GO:0019899,enzyme binding|GO:0050321,tau-protein kinase activity	GO:0005829,cytosol|GO:0005964,phosphorylase kinase complex	hsa04020 Calcium signaling pathway - Homo sapiens (human)|hsa04910 Insulin signaling pathway - Homo sapiens (human)|hsa04922 Glucagon signaling pathway - Homo sapiens (human)	0.0623294	0.0638297	0.0898606	0.0716451	0.0855175	0.110119	0.106814	0.0689403	0.182073	0.201005	0.231657	1.15318	0.437766	0.00112738	0.010203	0.0917321
DMR_464	6	158437966	158438419	453	8	cg13161113,cg01000602,cg08414108,cg08033719,cg11540979,cg15085633,cg02689008,cg19331059	SYNJ2	TSS200	opensea=8	GO:0006661,phosphatidylinositol biosynthetic process|GO:0036092,phosphatidylinositol-3-phosphate biosynthetic process|GO:0046856,phosphatidylinositol dephosphorylation|GO:0061024,membrane organization	GO:0003723,RNA binding|GO:0004438,phosphatidylinositol-3-phosphatase activity|GO:0004439,phosphatidylinositol-4,5-bisphosphate 5-phosphatase activity|GO:0005515,protein binding|GO:0034596,phosphatidylinositol phosphate 4-phosphatase activity|GO:0043813,phosphatidylinositol-3,5-bisphosphate 5-phosphatase activity|GO:0052629,phosphatidylinositol-3,5-bisphosphate 3-phosphatase activity	GO:0005829,cytosol|GO:0005856,cytoskeleton|GO:0005886,plasma membrane|GO:0030424,axon|GO:0045121,membrane raft	hsa00562 Inositol phosphate metabolism - Homo sapiens (human)|hsa01100 Metabolic pathways - Homo sapiens (human)|hsa04070 Phosphatidylinositol signaling system - Homo sapiens (human)	0.863675	0.88768	0.892734	0.882157	0.897231	0.755783	0.772431	0.723532	0.789681	0.809812	1.00108	1.31959	1.15966	0.00112738	0.010203	0.0917321
DMR_465	7	25898206	25898770	564	7	cg22727965,cg26053480,cg21852117,cg04939026,cg25121513,cg17774672,cg03190219		IGR	Island=6,N_Shore=1					0.77002	0.824939	0.804108	0.781651	0.779389	0.632009	0.64719	0.61792	0.679344	0.612447	1.09791	1.7436	1.29098	0.00111016	0.0101081	0.0908791
DMR_466	12	56545428	56545810	382	5	cg03407567,cg15769920,cg17467079,cg25012219,cg22958248	MYL6B	TSS1500	N_Shore=5	GO:0006936,muscle contraction|GO:0007519,skeletal muscle tissue development|GO:0030049,muscle filament sliding	GO:0003774,motor activity|GO:0005509,calcium ion binding|GO:0005515,protein binding|GO:0008307,structural constituent of muscle	GO:0005829,cytosol|GO:0005859,muscle myosin complex|GO:0016459,myosin complex|GO:0016461,unconventional myosin complex|GO:0070062,extracellular exosome	hsa04270 Vascular smooth muscle contraction - Homo sapiens (human)|hsa04530 Tight junction - Homo sapiens (human)|hsa04921 Oxytocin signaling pathway - Homo sapiens (human)	0.112311	0.120135	0.12447	0.122171	0.135626	0.158104	0.138283	0.140981	0.157155	0.168316	0.332907	0.984938	0.599553	0.00123925	0.0107204	0.0963838
DMR_467	21	34774627	34774726	99	2	cg17356733,cg17009165	IFNGR2	TSS1500	N_Shore=2	GO:0007166,cell surface receptor signaling pathway|GO:0009615,response to virus|GO:0060333,interferon-gamma-mediated signaling pathway|GO:0060334,regulation of interferon-gamma-mediated signaling pathway	GO:0004906,interferon-gamma receptor activity|GO:0004920,interleukin-10 receptor activity	GO:0000139,Golgi membrane|GO:0005783,endoplasmic reticulum|GO:0005789,endoplasmic reticulum membrane|GO:0005886,plasma membrane|GO:0005886,plasma membrane|GO:0005887,integral component of plasma membrane|GO:0030659,cytoplasmic vesicle membrane	hsa04060 Cytokine-cytokine receptor interaction - Homo sapiens (human)|hsa04066 HIF-1 signaling pathway - Homo sapiens (human)|hsa04380 Osteoclast differentiation - Homo sapiens (human)|hsa04630 Jak-STAT signaling pathway - Homo sapiens (human)|hsa04650 Natural killer cell mediated cytotoxicity - Homo sapiens (human)|hsa04658 Th1 and Th2 cell differentiation - Homo sapiens (human)|hsa04659 Th17 c…	0.660263	0.60142	0.63137	0.684626	0.714966	0.419817	0.394756	0.380125	0.419288	0.425675	1.24793	7.86802	4.55798	0.00042169	0.00570738	0.0513134
DMR_468	1	3162104	3163985	1881	13	cg16694785,cg10201191,cg19704073,cg17104202,cg12800122,cg16710099,cg10952596,cg19825974,cg22440573,cg27229529,cg13427179,cg24629455,cg00849570	PRDM16	Body	Island=2,N_Shore=11	GO:0000122,negative regulation of transcription from RNA polymerase II promoter|GO:0006351,transcription, DNA-templated|GO:0022008,neurogenesis|GO:0030512,negative regulation of transforming growth factor beta receptor signaling pathway|GO:0030512,negative regulation of transforming growth factor beta receptor signaling pathway|GO:0034968,histone lysine methylation|GO:0035019,somatic stem cell po…	GO:0003713,transcription coactivator activity|GO:0005515,protein binding|GO:0018024,histone-lysine N-methyltransferase activity|GO:0033613,activating transcription factor binding|GO:0043565,sequence-specific DNA binding|GO:0046332,SMAD binding|GO:0046872,metal ion binding	GO:0005634,nucleus|GO:0005654,nucleoplasm|GO:0005829,cytosol|GO:0005829,cytosol|GO:0016235,aggresome|GO:0017053,transcriptional repressor complex		0.871388	0.899563	0.872023	0.899005	0.905212	0.787618	0.815434	0.791617	0.777408	0.83492	0.978034	1.33395	1.11641	0.000516356	0.00653592	0.0587625
DMR_469	16	67218787	67219218	431	7	cg16548780,cg01126407,cg07545278,cg15321396,cg06361057,cg11238564,cg09758204	KIAA0895L	TSS1500	Island=7					0.147971	0.135373	0.145876	0.14713	0.157257	0.252673	0.230505	0.215277	0.284045	0.29192	0.279218	0.952108	0.519219	0.00112738	0.010203	0.0917321
DMR_470	2	201980467	201980854	387	7	cg18119407,cg23804054,cg03974286,cg13068048,cg13311930,cg15922088,cg25051278	CFLAR	TSS1500	N_Shore=7	GO:0006508,proteolysis|GO:0006915,apoptotic process|GO:0007519,skeletal muscle tissue development|GO:0010667,negative regulation of cardiac muscle cell apoptotic process|GO:0010976,positive regulation of neuron projection development|GO:0014732,skeletal muscle atrophy|GO:0014842,regulation of skeletal muscle satellite cell proliferation|GO:0014866,skeletal myofibril assembly|GO:0016032,viral proc…	GO:0002020,protease binding|GO:0005123,death receptor binding|GO:0005515,protein binding|GO:0008047,enzyme activator activity|GO:0032403,protein complex binding|GO:0097200,cysteine-type endopeptidase activity involved in execution phase of apoptosis	GO:0005737,cytoplasm|GO:0005829,cytosol|GO:0031264,death-inducing signaling complex|GO:0031265,CD95 death-inducing signaling complex|GO:0045121,membrane raft|GO:0097342,ripoptosome	hsa04064 NF-kappa B signaling pathway - Homo sapiens (human)|hsa04140 Autophagy - animal - Homo sapiens (human)|hsa04210 Apoptosis - Homo sapiens (human)|hsa04668 TNF signaling pathway - Homo sapiens (human)|hsa05142 Chagas disease (American trypanosomiasis) - Homo sapiens (human)	0.337312	0.339014	0.333494	0.361124	0.36638	0.21944	0.214707	0.187261	0.206081	0.246327	1.29452	2.39623	1.56106	0.00113598	0.0102152	0.0918416
DMR_471	1	155177561	155178215	654	7	cg16416987,cg04357256,cg11778548,cg27613645,cg24155444,cg11211259,cg02516288	THBS3,MTX1	TSS1500	N_Shore=7	GO:0003417,growth plate cartilage development|GO:0007160,cell-matrix adhesion|GO:0043931,ossification involved in bone maturation|GO:0060346,bone trabecula formation,GO:0006626,protein targeting to mitochondrion	GO:0005509,calcium ion binding|GO:0008201,heparin binding,	GO:0005576,extracellular region|GO:0048471,perinuclear region of cytoplasm,GO:0005741,mitochondrial outer membrane|GO:0016021,integral component of membrane	hsa04145 Phagosome - Homo sapiens (human)|hsa04151 PI3K-Akt signaling pathway - Homo sapiens (human)|hsa04510 Focal adhesion - Homo sapiens (human)|hsa04512 ECM-receptor interaction - Homo sapiens (human)|hsa05144 Malaria - Homo sapiens (human),	0.0356157	0.0305126	0.0352308	0.0341394	0.038341	0.0807882	0.0664675	0.0506641	0.129733	0.102757	0.230833	0.854837	0.446032	0.00114459	0.0102152	0.0918416
DMR_472	2	206628625	206628773	148	6	cg25715429,cg14157435,cg10126788,cg20351668,cg10807027,cg05348875	NRP2	Body	opensea=6	GO:0001525,angiogenesis|GO:0001938,positive regulation of endothelial cell proliferation|GO:0003148,outflow tract septum morphogenesis|GO:0007155,cell adhesion|GO:0007411,axon guidance|GO:0010595,positive regulation of endothelial cell migration|GO:0021675,nerve development|GO:0038084,vascular endothelial growth factor signaling pathway|GO:0048010,vascular endothelial growth factor receptor signa…	GO:0004872,receptor activity|GO:0005021,vascular endothelial growth factor-activated receptor activity|GO:0005515,protein binding|GO:0008201,heparin binding|GO:0017154,semaphorin receptor activity|GO:0019838,growth factor binding|GO:0019955,cytokine binding|GO:0046872,metal ion binding	GO:0002116,semaphorin receptor complex|GO:0005576,extracellular region|GO:0005886,plasma membrane|GO:0016020,membrane|GO:0016021,integral component of membrane		0.568994	0.561411	0.581542	0.590544	0.683118	0.410058	0.325206	0.36143	0.433267	0.496213	1.18442	1.76181	1.49952	0.0011618	0.0102827	0.0924487
DMR_473	1	115829419	115829893	474	5	cg04237618,cg12647496,cg13845149,cg04208291,cg00967809	NGF	5'UTR	opensea=5	GO:0000186,activation of MAPKK activity|GO:0006919,activation of cysteine-type endopeptidase activity involved in apoptotic process|GO:0007018,microtubule-based movement|GO:0007169,transmembrane receptor protein tyrosine kinase signaling pathway|GO:0007267,cell-cell signaling|GO:0008625,extrinsic apoptotic signaling pathway via death domain receptors|GO:0010469,regulation of receptor activity|GO:…	GO:0005163,nerve growth factor receptor binding|GO:0005515,protein binding|GO:0008083,growth factor activity|GO:0008191,metalloendopeptidase inhibitor activity	GO:0005576,extracellular region|GO:0005576,extracellular region|GO:0005768,endosome|GO:0005796,Golgi lumen|GO:0031410,cytoplasmic vesicle	hsa04010 MAPK signaling pathway - Homo sapiens (human)|hsa04014 Ras signaling pathway - Homo sapiens (human)|hsa04015 Rap1 signaling pathway - Homo sapiens (human)|hsa04151 PI3K-Akt signaling pathway - Homo sapiens (human)|hsa04210 Apoptosis - Homo sapiens (human)|hsa04722 Neurotrophin signaling pathway - Homo sapiens (human)|hsa04750 Inflammatory mediator regulation of TRP channels - Homo sapien…	0.862511	0.8826	0.885132	0.877459	0.891512	0.753007	0.765463	0.68023	0.789175	0.786798	0.998545	1.55463	1.20651	0.00124786	0.010733	0.0964975
DMR_474	9	82188393	82188754	361	3	cg17349081,cg14241138,cg06453019	TLE4	5'UTR	Island=2,S_Shore=1	GO:0000122,negative regulation of transcription from RNA polymerase II promoter|GO:0006351,transcription, DNA-templated|GO:0008150,biological_process|GO:0016055,Wnt signaling pathway|GO:1904837,beta-catenin-TCF complex assembly|GO:1990830,cellular response to leukemia inhibitory factor	GO:0003674,molecular_function|GO:0003682,chromatin binding|GO:0003705,transcription factor activity, RNA polymerase II distal enhancer sequence-specific binding|GO:0003714,transcription corepressor activity|GO:0005515,protein binding|GO:0070491,repressing transcription factor binding	GO:0005634,nucleus|GO:0005634,nucleus|GO:0005654,nucleoplasm		0.203365	0.209123	0.230963	0.278676	0.352558	0.11002	0.0589102	0.0699985	0.137004	0.165135	1.51259	4.00693	2.46617	0.00131671	0.0110923	0.099728
DMR_475	1	2099891	2100435	544	5	cg16644344,cg25727019,cg17156349,cg09225489,cg10313879	PRKCZ	Body	opensea=5	GO:0000226,microtubule cytoskeleton organization|GO:0001954,positive regulation of cell-matrix adhesion|GO:0006468,protein phosphorylation|GO:0006954,inflammatory response|GO:0007165,signal transduction|GO:0007179,transforming growth factor beta receptor signaling pathway|GO:0007616,long-term memory|GO:0008284,positive regulation of cell proliferation|GO:0008286,insulin receptor signaling pathway…	GO:0004672,protein kinase activity|GO:0004674,protein serine/threonine kinase activity|GO:0004674,protein serine/threonine kinase activity|GO:0004697,protein kinase C activity|GO:0005515,protein binding|GO:0005524,ATP binding|GO:0015459,potassium channel regulator activity|GO:0019901,protein kinase binding|GO:0019904,protein domain specific binding|GO:0043274,phospholipase binding|GO:0043560,insu…	GO:0005635,nuclear envelope|GO:0005737,cytoplasm|GO:0005768,endosome|GO:0005815,microtubule organizing center|GO:0005829,cytosol|GO:0005829,cytosol|GO:0005886,plasma membrane|GO:0005911,cell-cell junction|GO:0005923,bicellular tight junction|GO:0016020,membrane|GO:0016324,apical plasma membrane|GO:0016363,nuclear matrix|GO:0030054,cell junction|GO:0031252,cell leading edge|GO:0031941,filamentous …	hsa04015 Rap1 signaling pathway - Homo sapiens (human)|hsa04062 Chemokine signaling pathway - Homo sapiens (human)|hsa04071 Sphingolipid signaling pathway - Homo sapiens (human)|hsa04144 Endocytosis - Homo sapiens (human)|hsa04360 Axon guidance - Homo sapiens (human)|hsa04390 Hippo signaling pathway - Homo sapiens (human)|hsa04530 Tight junction - Homo sapiens (human)|hsa04611 Platelet activation…	0.516447	0.403684	0.532101	0.543528	0.625906	0.745363	0.630852	0.638497	0.729697	0.793691	0.397889	0.986037	0.695378	0.00127368	0.0108515	0.0975631
[truncated: 753 more rows]

## Sheet: Supplement file 3b
Supplement file 3b. GO pathway enrichment analysis of DMRs-related gene (Top 10 pathways)
ID	Description	pvalue	Type	geneID
GO:0048705	skeletal system morphogenesis	1.08303e-12	BP	ANKRD11/ARID5B/CDX1/CHAD/COL11A1/COL1A1/COL6A3/COL7A1/COMP/CSGALNACT1/DLX2/DLX5/DSCAML1/EYA1/FBN2/FGFR2/FMN1/GLI3/GRHL2/HHIP/HOXA3/HOXA4/HOXA5/HOXA6/HOXA7/HOXB1/HOXB2/HOXB3/HOXC4/HOXC8/HOXC9/HOXD10/HOXD4/HOXD9/HYAL2/LTF/MATN1/MATN4/MMP13/MMP2/MSX1/RARA/SATB2/SFRP2/SHOX2/SIX1/SLC39A1/SMAD3/TBX15/TGFBR2/THBS3/TRPV4/TWIST1/ZEB1
[truncated: 29 more rows]

## Sheet: Supplement file 3c
Supplement file 3c. KEGG pathway enrichment analysis of DMRs-related gene (Top 10 pathways)
ID	Description	GeneRatio	pvalue	geneSymbol
[truncated: 10 more rows]
